# Supplementary material for: Transcriptomic Analysis Reveals the Protective Effects of Empagliflozin on Lipid Metabolism in Nonalcoholic Fatty Liver Disease
Source: Front Pharmacol. 2021 Dec 21;12:793586. doi: 10.3389/fphar.2021.793586 (PMC8724565; doi:10.3389/fphar.2021.793586)
Supplement: Supplementary file 2 [file Table1.XLSX]

## Sheet: HFDvsCT
SYMBOL	logFC	AveExpr	t	P.Value	adj.P.Val	B
Tmem28	6.21346	1.20254	13.7475	1.93091e-09	3.56445e-05	10.9924
Aatk	3.07569	3.22906	12.5371	6.30314e-09	5.8178e-05	10.1012
Cyp2c69	-2.43377	2.69299	-10.9566	3.44856e-08	0.000196664	8.74823
Cyp2c40	-2.32012	4.41531	-10.7374	4.43435e-08	0.000196664	8.54135
Clstn3	3.05873	4.72599	10.4471	6.22576e-08	0.000196664	8.2596
Zfp979	4.98892	0.757481	10.2622	7.75752e-08	0.000196664	8.07541
Hapln1	-2.57244	-3.5211	-10.2322	8.04194e-08	0.000196664	8.04515
Ces2a	-1.27186	7.55231	-10.1839	8.52283e-08	0.000196664	7.99627
Gnai1	3.02983	1.34467	9.35342	2.39746e-07	0.000491746	7.11268
Acss2	-1.37567	6.5795	-9.08259	3.40978e-07	0.000629445	6.80635
Hr	2.8537	-0.0333889	8.95171	4.05379e-07	0.000680299	6.65494
Pmm1	1.54892	2.10009	8.67142	5.90851e-07	0.000908925	6.32315
Mtnr1a	1.88586	1.88756	8.31554	9.65445e-07	0.00135362	5.8866
Serpine2	2.26459	3.39344	8.27177	1.02658e-06	0.00135362	5.8317
Zfp992	2.58859	3.25748	8.16066	1.20093e-06	0.00141864	5.69112
Nsdhl	-2.01583	4.70875	-8.13446	1.24644e-06	0.00141864	5.65773
Gm40923	4.5022	-1.65822	8.10144	1.30644e-06	0.00141864	5.61548
H1f2	1.54992	5.25159	8.01435	1.47978e-06	0.00146477	5.50334
Itih5	-1.35306	3.48446	-7.9646	1.5896e-06	0.00146477	5.43879
Fam131c	1.48254	2.05484	7.95761	1.60569e-06	0.00146477	5.42969
Proca1	1.42164	2.35861	7.93195	1.66632e-06	0.00146477	5.39623
Rdh11	-1.24579	4.35728	-7.83454	1.91944e-06	0.00161058	5.26834
Cacng7	1.54986	0.484577	7.80139	2.01459e-06	0.00161693	5.22451
Syt11	1.31762	1.24091	7.7368	2.21465e-06	0.00164355	5.13862
Cyp2c68	-1.10907	7.63947	-7.73338	2.22583e-06	0.00164355	5.13405
Zfp981	3.13494	-1.93137	7.60171	2.70415e-06	0.00189384	4.95701
Pla1a	-0.822207	5.27385	-7.55907	2.88146e-06	0.00189384	4.89912
Acmsd	-2.05289	3.19032	-7.54194	2.95609e-06	0.00189384	4.87579
Gm5424	-1.42223	8.78242	-7.53764	2.97515e-06	0.00189384	4.86993
Pmvk	-1.27306	4.49443	-7.49579	3.16755e-06	0.0019491	4.81271
Ar	1.44033	2.82747	7.35004	3.94693e-06	0.00235033	4.61139
Hdc	-1.71576	4.19194	-7.32484	4.10109e-06	0.00236582	4.57626
Gm32468	3.61275	1.72392	7.26682	4.48066e-06	0.00250646	4.495
Ass1	-1.42553	10.6725	-7.21705	4.83584e-06	0.00262557	4.42488
Sema5b	2.42345	2.74159	7.09331	5.85395e-06	0.00307324	4.24889
Cps1	-1.38412	11.1361	-7.07816	5.99333e-06	0.00307324	4.22718
Gm33543	-2.41203	3.40519	-7.03257	6.43422e-06	0.00321015	4.16165
Gpc1	2.59375	3.80313	6.98703	6.90889e-06	0.00335627	4.09586
Fitm1	1.99846	4.70438	6.92111	7.66261e-06	0.00353881	4.00005
Zfp600	2.38542	-1.25558	6.90421	7.86945e-06	0.00353881	3.97538
Parp3	0.744791	5.09902	6.89943	7.92895e-06	0.00353881	3.9684
Kcnk10	2.16989	-0.124629	6.88972	8.05147e-06	0.00353881	3.95419
Nfil3	1.27739	5.01595	6.80839	9.15886e-06	0.00393192	3.83466
Blnk	1.23514	0.428616	6.78967	9.43588e-06	0.00395878	3.80699
Mir1948	-1.25622	-3.6813	-6.67827	1.1277e-05	0.00462608	3.64125
Gm2a	-0.668712	6.4474	-6.60081	1.27778e-05	0.00505673	3.52485
Trio	-0.635975	4.50205	-6.59614	1.28747e-05	0.00505673	3.5178
Dcaf6	-0.757399	5.46545	-6.55007	1.38738e-05	0.00530302	3.44808
Idi1	-2.17594	4.92381	-6.53316	1.42604e-05	0.00530302	3.42241
Orm3	3.21021	1.4004	6.52874	1.43636e-05	0.00530302	3.41568
Snx32	0.753736	2.33788	6.50061	1.50375e-05	0.00544297	3.37286
Taf1c	1.11041	1.23253	6.41898	1.71879e-05	0.00610172	3.24787
Adcy1	-1.90178	-1.28372	-6.38814	1.80825e-05	0.00613678	3.20037
Rpl3	-0.591972	7.65858	-6.38639	1.81346e-05	0.00613678	3.19768
Fmn1	-2.38516	1.19614	-6.38141	1.8284e-05	0.00613678	3.19
Ldlrad4	-0.752764	2.69072	-6.34347	1.94658e-05	0.00641676	3.13132
Ifi27l2b	1.98918	3.4608	6.31005	2.05736e-05	0.00655557	3.07943
Zfp618	-1.65415	0.463443	-6.30936	2.05971e-05	0.00655557	3.07836
Sowahc	0.8249	2.6176	6.25611	2.25027e-05	0.00701639	2.99533
Htra3	1.63452	0.950177	6.2481	2.28052e-05	0.00701639	2.9828
Slc35f2	2.32168	0.543397	6.21319	2.41737e-05	0.00714924	2.92807
Zfp982	1.97232	1.90145	6.21082	2.42695e-05	0.00714924	2.92435
Nfx1	-0.586257	5.63936	-6.19967	2.47265e-05	0.00714924	2.90682
Mogat1	3.24798	0.923017	6.19823	2.47861e-05	0.00714924	2.90456
Srrm2	-0.64381	7.52247	-6.16256	2.63128e-05	0.00737463	2.84837
Fdps	-1.54725	5.24668	-6.16086	2.63883e-05	0.00737463	2.84568
Cyp51	-1.8058	5.67076	-6.14422	2.71361e-05	0.00737463	2.81939
Mup17	5.78876	8.36021	6.14358	2.71655e-05	0.00737463	2.81838
A730081D07Rik	-1.20806	-1.26092	-6.05078	3.17709e-05	0.00849987	2.67095
Cep135	-0.781821	1.88188	-6.0384	3.24445e-05	0.00855607	2.65118
Lrp3	0.677957	4.39365	6.00849	3.41351e-05	0.00887512	2.6033
Gcat	-0.835358	5.65917	-5.97576	3.60903e-05	0.00925316	2.55077
Rad51b	2.06101	2.75598	5.95504	3.73889e-05	0.00945479	2.51741
Tbc1d24	-0.692174	4.096	-5.93076	3.89731e-05	0.00972222	2.47824
Arg1	-0.780342	10.0272	-5.89759	4.12519e-05	0.0101535	2.42458
Wnt5a	1.80823	0.31299	5.86797	4.34041e-05	0.0105426	2.37653
Six5	0.870799	2.20564	5.79198	4.94823e-05	0.0117729	2.2526
Cth	-1.02864	8.04125	-5.78356	5.02087e-05	0.0117729	2.23881
Cd59b	1.20278	2.28331	5.78157	5.03823e-05	0.0117729	2.23555
Simc1	-0.980709	3.61362	-5.76421	5.19207e-05	0.011901	2.20708
Sox9	1.43746	2.26329	5.7609	5.22199e-05	0.011901	2.20164
Egln1	0.68235	4.74191	5.73978	5.41688e-05	0.0120323	2.16695
Slc13a3	1.33555	4.43752	5.73468	5.46512e-05	0.0120323	2.15855
Id3	1.39948	5.89973	5.72841	5.525e-05	0.0120323	2.14823
Ahsg	-0.779379	12.1807	-5.72379	5.56961e-05	0.0120323	2.14062
H4c1	1.35585	-3.72729	5.7201	5.60552e-05	0.0120323	2.13453
Themis	4.21563	1.27793	5.68969	5.91046e-05	0.012541	2.08435
Slc35g1	-1.13943	4.80411	-5.67569	6.05657e-05	0.0126548	2.0612
Rap2a	0.651925	4.66667	5.67149	6.10117e-05	0.0126548	2.05425
Cdkn2d	0.882008	0.950572	5.64244	6.41909e-05	0.0131663	2.00609
Lrp11	1.35383	1.10993	5.61499	6.73547e-05	0.0136634	1.96046
Eid2b	0.752125	1.54155	5.56052	7.41237e-05	0.0148731	1.86959
Uck1	0.979519	5.46819	5.55208	7.52348e-05	0.0149337	1.85546
Ppm1m	0.678462	4.16543	5.53759	7.71835e-05	0.0151575	1.83118
Srrm4	-1.5874	2.60421	-5.53125	7.80519e-05	0.0151667	1.82056
Chrna4	-3.97471	-0.484256	-5.51347	8.05426e-05	0.0154877	1.79072
1700113A16Rik	0.661313	1.36373	5.50116	8.23169e-05	0.0156657	1.77002
Zfp423	1.95742	-0.376784	5.47408	8.63631e-05	0.016268	1.72442
Tm7sf2	-1.2562	5.53862	-5.46268	8.81276e-05	0.0164327	1.7052
Aldh1a1	0.981144	10.7538	5.45176	8.98535e-05	0.0164833	1.68676
Hmgcr	-1.31965	4.78655	-5.44969	9.01852e-05	0.0164833	1.68326
Jak3	0.742724	3.72851	5.43406	9.27259e-05	0.0165468	1.65684
Nckap5	-1.50784	-0.977463	-5.43155	9.31408e-05	0.0165468	1.6526
Ttbk1	2.43259	0.655901	5.43107	9.32215e-05	0.0165468	1.65178
Stat5a	0.861817	4.24368	5.4117	9.64934e-05	0.0168674	1.61897
Tpm2	1.95343	4.01417	5.40631	9.74246e-05	0.0168674	1.60983
Ccl9	-1.0933	5.03392	-5.40433	9.77691e-05	0.0168674	1.60648
Trhde	3.05478	-0.616062	5.37473	0.000103075	0.0172897	1.5562
Hspb1	2.12824	4.60484	5.37126	0.000103715	0.0172897	1.5503
Ybey	0.534854	1.8155	5.37119	0.000103728	0.0172897	1.55018
Mup9	4.54699	6.0453	5.36993	0.000103963	0.0172897	1.54803
Smc5	-0.731338	3.97957	-5.36092	0.000105652	0.0174137	1.5327
Hsd17b7	-1.1441	5.0292	-5.32848	0.000111973	0.0181708	1.47738
Fkbp5	-1.35382	5.06291	-5.3228	0.00011312	0.0181708	1.46768
Cav1	1.88194	1.9892	5.32241	0.000113198	0.0181708	1.46702
Dipk2a	0.50389	5.10648	5.30471	0.000116854	0.018523	1.43676
Slc38a3	-0.721986	9.76959	-5.30212	0.000117399	0.018523	1.43232
C4a	1.29792	6.27936	5.29596	0.000118707	0.0185706	1.42177
Scpep1	-0.492618	5.01571	-5.27952	0.000122271	0.0189674	1.3936
Igf2bp2	1.05478	1.26243	5.26228	0.000126125	0.0194023	1.36402
Etnppl	-1.54813	6.89439	-5.2546	0.000127885	0.0195104	1.35082
Vnn1	1.44778	7.07363	5.22317	0.000135353	0.020203	1.29674
Pknox2	1.34652	1.17996	5.22077	0.00013594	0.020203	1.29261
9030619P08Rik	2.44972	2.43481	5.21235	0.000138026	0.020203	1.27809
Serpinc1	-0.469682	10.7395	-5.20226	0.000140571	0.020203	1.26067
Psmb9	0.830885	3.58001	5.20058	0.000140999	0.020203	1.25777
Lcn2	2.74093	4.03449	5.19786	0.000141693	0.020203	1.25309
Slc25a32	-0.674355	4.83831	-5.19577	0.000142231	0.020203	1.24948
Chd6	-0.507606	4.2655	-5.19462	0.000142528	0.020203	1.24749
Slco2a1	-1.1642	5.95296	-5.19307	0.000142928	0.020203	1.24482
Tlr12	1.79343	3.41824	5.19004	0.000143717	0.020203	1.23957
Mir1968	-1.1852	-3.00784	-5.18424	0.000145234	0.020203	1.22956
Adgrf1	-5.08312	0.796599	-5.17448	0.000147829	0.020203	1.21267
Amot	-0.832871	2.74056	-5.1712	0.000148709	0.020203	1.20701
Cyp21a1	3.3417	-1.03802	5.17079	0.00014882	0.020203	1.2063
Acot11	1.77371	2.41845	5.17072	0.000148841	0.020203	1.20616
2021-09-03	-1.90806	-3.37243	-5.1652	0.000150338	0.0202572	1.19662
Rapgef4	-1.11075	7.25647	-5.15513	0.000153113	0.0203343	1.17917
Cntnap1	2.39213	1.74544	5.15392	0.000153452	0.0203343	1.17707
4930426L09Rik	1.4704	-3.79803	5.15118	0.000154215	0.0203343	1.17233
Atp8b5	1.85108	-0.56638	5.14608	0.000155652	0.0203783	1.16348
Rarres1	2.15116	5.40738	5.13396	0.000159121	0.0206857	1.14246
Cacnb1	1.59918	-0.914999	5.1295	0.000160418	0.0207086	1.13471
Adam11	1.46685	4.40285	5.10415	0.000167999	0.0214285	1.09065
Chgb	-2.31914	-3.195	-5.10182	0.000168714	0.0214285	1.0866
B4galnt3	1.34344	0.521453	5.09672	0.000170291	0.0214285	1.07772
Sash1	-0.641994	4.94964	-5.09561	0.000170638	0.0214285	1.07577
Lgr5	0.897118	2.97769	5.0905	0.000172237	0.0214831	1.06687
Plekhb1	0.652201	5.07946	5.06411	0.000180742	0.0223049	1.02086
Ulk1	-0.557119	6.34787	-5.06035	0.000181991	0.0223049	1.01429
2210417A02Rik	0.934886	0.758563	5.04349	0.000187694	0.0223049	0.984826
Plod1	0.479285	5.8013	5.04077	0.00018863	0.0223049	0.98008
Slc39a4	-1.38404	4.62152	-5.04041	0.000188754	0.0223049	0.979451
Cyp2c23	-0.861133	8.35432	-5.03917	0.000189185	0.0223049	0.977274
Inhbe	1.27218	6.48713	5.03882	0.000189305	0.0223049	0.976667
Tmem19	0.94515	6.49328	5.03833	0.000189475	0.0223049	0.975812
Apoa4	2.73813	9.19967	5.03768	0.0001897	0.0223049	0.974675
Tpcn1	0.571257	5.92874	5.03108	0.000192009	0.0223863	0.963125
Hamp2	-2.07856	4.87469	-5.02661	0.000193589	0.0223863	0.955296
L3hypdh	0.543353	4.25401	5.02213	0.000195187	0.0223863	0.947446
Capn2	0.461951	5.68398	5.02197	0.000195243	0.0223863	0.94717
Got1	-1.33623	6.73124	-5.0118	0.00019892	0.0224482	0.929352
Gda	0.712969	4.5709	5.01107	0.000199187	0.0224482	0.928072
Tcf24	-4.05353	-0.352946	-5.00765	0.000200441	0.0224482	0.922075
Saa4	0.66791	8.28723	5.00709	0.000200648	0.0224482	0.921093
Aldh3a2	1.01667	9.35377	4.99954	0.000203449	0.0226128	0.90785
A930011G23Rik	-1.46452	3.52817	-4.99358	0.000205691	0.0226128	0.897378
Slc38a2	-1.06175	6.7338	-4.99331	0.000205793	0.0226128	0.896904
Cfd	5.63266	1.62321	4.97762	0.000211815	0.0230638	0.869354
1110019D14Rik	0.821991	1.10245	4.97439	0.000213079	0.0230638	0.863667
Samd11	2.00606	-3.38296	4.97294	0.000213647	0.0230638	0.861126
Irak2	0.972077	4.60823	4.96493	0.000216819	0.0231488	0.847042
Marveld1	0.655328	4.88399	4.96463	0.000216941	0.0231488	0.846503
Ktn1	-0.607341	4.04929	-4.95826	0.0002195	0.0232254	0.835298
Fasn	-0.893058	6.89326	-4.95466	0.000220962	0.0232254	0.828955
Plpbp	0.43733	6.01935	4.95089	0.000222502	0.0232254	0.822318
Igsf1	-2.34986	-3.04044	-4.95043	0.000222692	0.0232254	0.821504
Lpin1	-2.41766	5.24483	-4.94621	0.000224429	0.0232751	0.814077
Tspyl5	1.28022	-0.500583	4.93003	0.000231228	0.0238462	0.785556
Dpy19l3	0.921012	3.05198	4.90926	0.000240272	0.0245197	0.748883
Cebpe	1.02718	3.1099	4.90894	0.000240416	0.0245197	0.748313
Cyp2g1	-2.27138	-0.330799	-4.90594	0.000241753	0.0245207	0.743009
Sqle	-2.16747	3.56022	-4.88922	0.000249347	0.0251527	0.713441
Cnot10	-0.373332	4.37459	-4.88169	0.00025285	0.0253674	0.700106
Slc16a13	2.11614	1.85919	4.87454	0.000256219	0.0255665	0.687449
Ttll4	-0.796967	3.8713	-4.86993	0.000258418	0.0256473	0.679276
Capn10	-0.824751	3.99698	-4.85819	0.000264101	0.0260712	0.658476
Ccng1	0.501393	5.05863	4.85523	0.000265558	0.0260756	0.653214
Capn1	0.503098	4.51406	4.84757	0.000269361	0.0262058	0.639619
Tent5a	-1.12141	3.30075	-4.84605	0.000270121	0.0262058	0.636925
Gfod1	0.882302	1.38947	4.84401	0.000271144	0.0262058	0.63331
Lgals1	2.11058	5.06682	4.83615	0.000275133	0.0264529	0.619343
Fbxl21	0.912403	2.17223	4.82375	0.000281547	0.0266587	0.597301
Slc9b2	-1.99412	-3.63056	-4.82261	0.000282141	0.0266587	0.595284
Nat8	1.49894	4.32783	4.82111	0.000282932	0.0266587	0.592607
Car3	1.16277	11.5629	4.82088	0.00028305	0.0266587	0.592207
Klrk1	-0.733886	0.800851	-4.79805	0.000295334	0.0276745	0.551569
Wfdc2	1.98414	2.31044	4.78284	0.000303826	0.0283265	0.524449
Ptk6	1.49943	-0.794252	4.77872	0.000306169	0.0284014	0.5171
Lrrc3	0.4559	6.65848	4.76906	0.000311733	0.0286789	0.49987
Gabrd	2.745	-2.97853	4.76746	0.000312666	0.0286789	0.497011
Rbbp6	-0.491	5.76137	-4.76309	0.000315229	0.0286789	0.4892
Tob2	-1.07755	5.44358	-4.76123	0.000316324	0.0286789	0.485882
Btbd7	-0.482202	4.26847	-4.76021	0.000316928	0.0286789	0.484056
Ift140	0.645406	3.05043	4.73901	0.000329732	0.029503	0.446157
Fosl2	0.681332	3.5677	4.73888	0.000329812	0.029503	0.445925
Zfp879	1.25617	-0.620169	4.73723	0.00033083	0.029503	0.442977
Tgm2	0.580816	7.15849	4.73236	0.000333854	0.0295112	0.434268
Gm10791	1.57024	-3.70943	4.73194	0.000334119	0.0295112	0.43351
Acly	-0.716695	6.63323	-4.72824	0.000336439	0.0295746	0.426887
Gtf2b	-0.557168	4.28653	-4.71732	0.000343386	0.0300422	0.407328
Adgrg2	1.68565	1.77676	4.71149	0.000347154	0.0302091	0.396881
Mup13	1.9778	8.46339	4.70932	0.000348566	0.0302091	0.392997
Xkr9	-0.714004	3.83933	-4.70265	0.000352951	0.0304462	0.381031
Enoph1	0.578257	2.02222	4.69645	0.000357073	0.0306585	0.369917
Grem2	-1.58523	2.52528	-4.68974	0.000361598	0.0309032	0.357864
Cxcl11	1.26476	2.06785	4.67992	0.000368321	0.0310699	0.34023
Camk2n2	1.27987	0.515991	4.67844	0.000369345	0.0310699	0.337573
Nts	-2.14295	-3.29296	-4.6773	0.000370134	0.0310699	0.335532
Cidea	7.53539	0.0521688	4.67709	0.000370281	0.0310699	0.335151
4933404O12Rik	0.571044	2.21648	4.67128	0.000374342	0.0312685	0.324709
Cdh18	3.32082	-0.789646	4.66548	0.000378442	0.0314687	0.31428
Recql4	0.890561	1.09716	4.65717	0.000384397	0.0318205	0.299335
Ankrd46	0.476472	5.56597	4.65007	0.000389557	0.0320152	0.286569
Serpina1d	-0.448483	11.8597	-4.64917	0.000390218	0.0320152	0.284945
Osbpl3	3.16325	2.6979	4.62745	0.000406497	0.0332032	0.245815
Nrp2	1.22774	4.55471	4.6225	0.000410306	0.0333667	0.236885
Fabp2	1.08138	6.95222	4.61988	0.000412331	0.0333844	0.232171
Zfp788	0.808665	1.09183	4.58854	0.000437433	0.0350301	0.175582
Syt3	1.00491	2.46266	4.58722	0.000438524	0.0350301	0.173197
Stap1	1.88701	1.00752	4.58624	0.000439334	0.0350301	0.17143
Espnl	-2.54796	-3.23967	-4.58163	0.000443172	0.0350301	0.163101
Cyp4a31	-1.28777	6.43327	-4.58061	0.000444026	0.0350301	0.161257
Tmem43	0.816352	3.45868	4.58059	0.000444043	0.0350301	0.16122
Adgra3	0.633093	5.34282	4.57391	0.000449679	0.0353237	0.149142
Arid3a	1.37262	0.986186	4.56796	0.000454769	0.0355335	0.138362
Tppp	1.39378	3.62358	4.56629	0.0004562	0.0355335	0.135354
Pnpla2	-0.590251	6.45805	-4.56167	0.000460207	0.0356951	0.126978
Pik3c2b	0.672728	2.59719	4.55577	0.000465362	0.0359439	0.11631
Gnmt	-0.953177	10.0659	-4.55265	0.000468118	0.036006	0.110656
Pcsk6	0.78466	6.99002	4.54225	0.000477418	0.0365691	0.0918142
Irx1	1.85743	-0.528046	4.51493	0.000502778	0.0382246	0.042243
Gls2	-0.924033	7.77299	-4.50925	0.000508223	0.0382246	0.0319266
Ascc3	-0.511612	4.6887	-4.50679	0.000510593	0.0382246	0.0274703
Rab34	0.638245	2.4316	4.50595	0.000511412	0.0382246	0.0259348
Zbtb11	-0.66432	3.68375	-4.50422	0.000513094	0.0382246	0.0227893
Fnbp1	0.459651	4.53913	4.50421	0.000513096	0.0382246	0.0227863
Pcp4l1	1.31181	3.57255	4.50377	0.000513527	0.0382246	0.0219816
Slc35a4	-1.02903	3.142	-4.49502	0.000522128	0.0387088	0.00607052
Brox	1.30479	4.11876	4.48281	0.000534367	0.0394576	-0.0161225
Albfm1	-0.756394	5.7208	-4.47011	0.000547419	0.040252	-0.0392394
Rnd1	0.952115	3.70753	4.46759	0.000550044	0.040252	-0.043821
Rdh1	-1.33625	3.15883	-4.46604	0.000551666	0.040252	-0.0466432
Chrm3	2.32258	1.29099	4.45795	0.000560216	0.0407149	-0.0613755
Map3k14	0.952038	2.1993	4.43829	0.000581577	0.0417591	-0.0972239
Xlr3c	2.21442	-3.09721	4.4352	0.00058501	0.0417591	-0.102862
Aldh1l1	-0.781013	9.63753	-4.43461	0.000585666	0.0417591	-0.103935
Ptpru	1.79974	-0.592276	4.43438	0.000585918	0.0417591	-0.104347
Sclt1	-0.597249	2.3407	-4.4327	0.000587798	0.0417591	-0.107417
Cyp2d40	1.08295	6.07725	4.43238	0.000588156	0.0417591	-0.107999
Egr2	2.61207	-1.90819	4.42905	0.000591897	0.0418636	-0.114073
Smpd3	1.71588	1.0196	4.42327	0.000598451	0.0421258	-0.124623
Dis3l2	-0.377449	3.82253	-4.42177	0.000600168	0.0421258	-0.127367
Nxpe2	1.53613	4.68842	4.41791	0.000604595	0.0421559	-0.134407
Fnbp4	-0.526645	5.23125	-4.41619	0.000606589	0.0421559	-0.137562
Mir5125	-0.782968	1.51859	-4.41457	0.000608457	0.0421559	-0.140509
S100a10	0.903128	6.68757	4.41348	0.000609731	0.0421559	-0.142512
Camk1	0.42833	3.81154	4.40936	0.00061454	0.0423299	-0.150039
Pcsk9	-1.85042	3.40263	-4.40412	0.000620706	0.0425956	-0.159602
H1f4	1.92173	-1.25757	4.3966	0.000629683	0.0430517	-0.173359
Gmds	-1.04246	0.882046	-4.39288	0.00063416	0.0431978	-0.180147
Dio1	1.13249	6.83136	4.38843	0.000639573	0.0432887	-0.188289
Zbtb8a	0.715871	1.22175	4.38793	0.000640185	0.0432887	-0.189206
Dnah8	0.879538	-0.339178	4.38601	0.000642538	0.0432892	-0.19272
Blvrb	0.663587	7.08529	4.3742	0.000657193	0.0441156	-0.214326
Gm20257	1.35359	1.05018	4.36935	0.000663311	0.0443649	-0.223203
Spdef	-2.59598	-3.39628	-4.35067	0.000687436	0.0458125	-0.25743
Fam149a	0.469941	4.80432	4.34572	0.000693976	0.0460094	-0.266502
Cyp2j9	-1.1731	4.00306	-4.34467	0.000695375	0.0460094	-0.26843
Ino80	-0.380564	4.38618	-4.33665	0.000706137	0.0464011	-0.283145
Adgrv1	2.63364	1.97044	4.33651	0.000706322	0.0464011	-0.283395
Hprt	0.328338	5.70132	4.33134	0.000713347	0.04656	-0.292878
F10	-0.486664	8.68943	-4.33102	0.000713785	0.04656	-0.293465
Cplane1	0.731935	2.64834	4.32878	0.000716853	0.0465955	-0.297575
Slc15a5	1.08436	1.97345	4.31422	0.000737135	0.0477457	-0.324305
Abcg8	-0.668096	6.40865	-4.31054	0.000742356	0.0479157	-0.331067
Nasp	-0.500103	3.84356	-4.30698	0.000747446	0.0480761	-0.337613
9530068E07Rik	-0.327386	7.01253	-4.30082	0.000756321	0.0484781	-0.348922
Nipal1	-3.78905	1.23248	-4.29828	0.000760014	0.0485463	-0.353589
Fgfr2	-0.694231	4.92843	-4.29131	0.000770253	0.0489019	-0.366409
Fgf11	1.50597	-0.535678	4.29089	0.00077088	0.0489019	-0.367189
Il12rb1	-1.3702	-0.638042	-4.2863	0.000777694	0.049039	-0.37562
Asl	-0.682568	8.1523	-4.28488	0.000779812	0.049039	-0.378226
Tap1	0.681537	4.18922	4.28408	0.000781011	0.049039	-0.379698
Cyp2j13	-2.14513	-2.04594	-4.2817	0.000784588	0.0490966	-0.384076
Cd81	0.54467	7.56348	4.27665	0.000792243	0.0494081	-0.393377
Tmco4	-0.480773	3.88051	-4.27039	0.000801829	0.0498376	-0.4049
Rfc2	0.404942	4.50661	4.26555	0.000809321	0.0501345	-0.41381
Acaa1b	0.697945	10.5326	4.263	0.000813285	0.0502115	-0.418491
Gm46409	-1.68537	-3.54277	-4.25843	0.000820461	0.0504324	-0.426906
Ppp2r2d	-0.621093	5.2781	-4.25725	0.000822327	0.0504324	-0.429083
Plekhh3	0.595802	2.91073	4.25163	0.000831266	0.0505554	-0.439441
Slc38a6	0.431066	2.8627	4.25134	0.000831727	0.0505554	-0.439972
Chchd6	0.843487	1.8611	4.25083	0.000832549	0.0505554	-0.440918
Rab13	0.549058	2.82124	4.24585	0.000840554	0.0508742	-0.450086
Tfrc	-0.999083	3.39872	-4.23874	0.000852131	0.0513625	-0.463191
1700037H04Rik	0.879062	2.01604	4.23749	0.000854187	0.0513625	-0.465499
Castor2	1.15821	2.20986	4.2311	0.000864762	0.0518296	-0.477286
Lbr	-0.758444	2.66019	-4.21685	0.000888817	0.0528793	-0.503571
Ddit3	1.15734	3.8556	4.2145	0.00089286	0.0528793	-0.507919
Pfkfb2	-0.704415	3.71946	-4.21444	0.000892952	0.0528793	-0.508016
Nupl1	-0.446944	3.85073	-4.21399	0.000893734	0.0528793	-0.508856
Cndp1	2.32429	-1.4776	4.20988	0.000900835	0.053013	-0.516437
Dnajc28	0.551199	3.6952	4.20697	0.000905902	0.053013	-0.52181
Extl1	2.64227	2.00944	4.20693	0.000905974	0.053013	-0.521886
Slc16a2	0.474395	7.60469	4.2044	0.000910402	0.053013	-0.526557
Gm15527	-1.62258	-3.54716	-4.20359	0.000911823	0.053013	-0.528051
Alb	-0.483249	16.2821	-4.20279	0.000913225	0.053013	-0.529522
Tubb1	1.80595	-3.41926	4.19942	0.000919183	0.0531916	-0.535752
Zfp512b	-0.619508	5.15955	-4.19674	0.000923945	0.0533001	-0.540701
D930048N14Rik	0.811765	3.4415	4.18792	0.000939798	0.0540457	-0.556998
Lyrm1	0.576132	1.02327	4.18123	0.000952013	0.0545781	-0.569368
Npnt	1.66416	0.781202	4.17786	0.000958223	0.0546483	-0.575596
Acbd4	0.769451	4.76526	4.17735	0.000959157	0.0546483	-0.57653
Ddx54	-0.344593	5.19598	-4.17431	0.000964814	0.0548015	-0.582163
Slc22a1	0.582064	8.40673	4.17116	0.000970692	0.0548642	-0.58798
Rab3a	0.605338	2.12597	4.17054	0.000971862	0.0548642	-0.589134
Scamp1	-0.635819	5.26887	-4.16892	0.000974895	0.0548676	-0.592119
Serinc2	1.03322	4.27628	4.16655	0.000979369	0.0549095	-0.596505
Ddo	0.586011	4.10719	4.16538	0.000981588	0.0549095	-0.598673
Them7	0.791049	4.41857	4.16363	0.000984916	0.0549292	-0.601915
Wnt5b	1.25383	1.7736	4.15469	0.00100207	0.0557174	-0.618452
Fzd8	1.08504	3.64282	4.14707	0.00101693	0.0562663	-0.632549
Zdhhc23	-1.43734	-0.319011	-4.14394	0.0010231	0.0562663	-0.638348
Fam102a	0.627503	5.0345	4.14166	0.00102762	0.0562663	-0.642573
Ccdc166	0.999888	1.19777	4.13987	0.0010312	0.0562663	-0.645899
Klb	-0.727156	4.86159	-4.13872	0.00103348	0.0562663	-0.648019
Pax8	2.35916	-2.14781	4.13843	0.00103406	0.0562663	-0.648555
Atp11b	-0.40223	4.97136	-4.13454	0.00104188	0.0562663	-0.655768
Gprin3	-0.965004	3.56429	-4.13289	0.0010452	0.0562663	-0.658812
Adra2b	1.05157	1.5388	4.131	0.00104902	0.0562663	-0.662312
Tmem189	0.952102	4.40313	4.13038	0.00105029	0.0562663	-0.663465
Ctsl	-0.519244	8.39306	-4.12944	0.0010522	0.0562663	-0.665206
Tmem126b	0.339463	4.49852	4.12872	0.00105367	0.0562663	-0.666546
Stx2	0.614177	4.05488	4.12739	0.00105639	0.0562663	-0.669011
Tbx2	-0.595889	1.40729	-4.12694	0.0010573	0.0562663	-0.669843
Mgst1	0.425869	11.434	4.12535	0.00106056	0.0562663	-0.67279
Mpv17	0.440669	4.67977	4.12508	0.00106111	0.0562663	-0.673284
Olig1	1.42634	2.30683	4.12296	0.00106548	0.0562663	-0.677223
Atg2a	-0.416312	5.77309	-4.12022	0.00107115	0.0562663	-0.682303
Chpt1	0.871946	6.97753	4.11941	0.00107282	0.0562663	-0.683794
Nat8f2	0.546613	10.1885	4.11937	0.0010729	0.0562663	-0.683868
Fkbp4	0.689484	7.20837	4.11752	0.00107676	0.0563085	-0.687302
Gid4	0.487032	5.14069	4.11069	0.00109108	0.0568962	-0.699956
Slc17a9	1.026	2.32305	4.10646	0.00110007	0.0572036	-0.707816
Cry1	0.732354	2.96829	4.10369	0.00110599	0.0573497	-0.712954
Ttc30b	0.824811	2.32772	4.102	0.00110961	0.0573765	-0.716087
Atrn	-0.402714	6.38404	-4.10029	0.00111329	0.0574062	-0.719261
Cyb5r1	-0.57282	2.98665	-4.09284	0.00112947	0.0580779	-0.733074
Tnrc6a	-0.380068	5.88579	-4.08865	0.00113867	0.0583887	-0.740848
Rex2	1.89761	-2.23053	4.0851	0.00114655	0.0585584	-0.747444
LOC115489950	1.80942	-3.33011	4.08329	0.00115057	0.0585584	-0.750802
Rabggtb	-0.369557	5.13503	-4.08048	0.00115685	0.0585584	-0.756016
Def8	0.454328	5.76248	4.07945	0.00115917	0.0585584	-0.757927
Acsl5	-0.497135	8.2173	-4.0789	0.00116041	0.0585584	-0.758956
Dlgap1	-0.677375	0.557995	-4.07863	0.00116102	0.0585584	-0.759456
Upp2	-1.89966	5.92247	-4.06587	0.00119011	0.0598623	-0.783155
Lancl1	-0.364226	4.0146	-4.05969	0.00120445	0.0603492	-0.794622
Lss	-1.02114	4.45526	-4.05889	0.00120633	0.0603492	-0.796117
Sytl1	0.826479	2.37261	4.05374	0.00121845	0.0606309	-0.805688
Anpep	0.310246	7.4711	4.0537	0.00121853	0.0606309	-0.805751
Slc35b4	0.334093	4.66571	4.05171	0.00122326	0.0607025	-0.809459
Teddm1b	-1.79154	-2.43425	-4.04749	0.00123333	0.0610381	-0.817307
Npr2	0.984318	6.52056	4.04382	0.00124213	0.0613094	-0.824117
Abi2	-0.721968	1.40361	-4.04015	0.00125103	0.0615842	-0.830955
Fam204a	-0.583188	2.08909	-4.03472	0.0012643	0.0620716	-0.841052
Tmem177	0.471082	3.22546	4.03333	0.00126771	0.0620742	-0.843634
BC029722	0.656479	3.86607	4.02043	0.00129988	0.0630147	-0.867623
Exoc5	-0.430342	4.01166	-4.01972	0.00130168	0.0630147	-0.868946
Cabcoco1	-0.807005	0.5197	-4.01935	0.00130261	0.0630147	-0.869636
Cbx2	0.708079	2.99897	4.01921	0.00130298	0.0630147	-0.869902
Nostrin	-0.574221	3.81108	-4.01657	0.00130968	0.0630147	-0.874812
Irs3	2.11369	-2.97931	4.01648	0.0013099	0.0630147	-0.874978
Tmprss4	-1.73835	-1.15508	-4.01505	0.00131357	0.0630147	-0.87765
St3gal5	-1.07499	7.11496	-4.01349	0.00131754	0.0630147	-0.880539
2810408I11Rik	0.961924	0.540622	4.01345	0.00131764	0.0630147	-0.880616
Arhgef19	0.672277	5.9203	4.00896	0.00132921	0.0634039	-0.888987
Nbeal2	0.521168	3.63372	4.0062	0.00133636	0.0635804	-0.894118
Dhcr7	-1.10363	4.84332	-4.00439	0.00134106	0.06364	-0.897479
Ppp1r3g	-3.13229	-2.32062	-4.00198	0.00134737	0.0637054	-0.901976
S1pr5	1.10111	1.92118	4.00103	0.00134987	0.0637054	-0.903747
1600023N17Rik	1.02812	-2.55995	3.99992	0.00135279	0.0637054	-0.905816
Tle4	-1.01259	3.08537	-3.99759	0.00135892	0.0638312	-0.910144
Atp9a	0.498551	6.15041	3.99609	0.0013629	0.0638558	-0.912945
Mapk15	0.782143	4.33349	3.99237	0.0013728	0.0641567	-0.919871
Chn1os3	1.35781	0.993364	3.98565	0.00139089	0.0647025	-0.932399
Shisa3	1.28021	-1.13006	3.98476	0.00139329	0.0647025	-0.93405
Arrdc1	0.509122	1.66688	3.98413	0.00139499	0.0647025	-0.935221
Cyp4f14	-0.580005	6.93869	-3.98071	0.00140433	0.0649721	-0.941603
Bmyc	1.2552	1.78323	3.97244	0.00142712	0.0656838	-0.957011
AW011738	0.624625	1.75518	3.97236	0.00142734	0.0656838	-0.957161
Zfp800	0.386602	2.52532	3.97126	0.00143038	0.0656838	-0.959199
Dhrs7b	0.496718	4.23092	3.96859	0.00143785	0.0657702	-0.964178
Il4ra	0.388437	5.13198	3.96804	0.00143939	0.0657702	-0.965206
Prdx4	-0.490673	5.82685	-3.95946	0.00146367	0.0665997	-0.981211
Crygn	1.51354	1.43308	3.95907	0.00146476	0.0665997	-0.981927
Cd209f	-2.82184	-3.34089	-3.9548	0.001477	0.0669912	-0.989889
Ehd1	0.449023	5.26341	3.9524	0.00148393	0.0670203	-0.994368
Abcg2	0.603142	6.56739	3.952	0.00148509	0.0670203	-0.995116
Samd1	0.737568	3.6034	3.95081	0.00148853	0.0670203	-0.997334
Gm31121	3.00795	-2.2916	3.94804	0.00149661	0.0672202	-1.00251
Inf2	0.551373	5.58219	3.94649	0.00150114	0.0672597	-1.0054
Tmem119	1.29738	-0.887086	3.94286	0.0015118	0.0674263	-1.01217
Pik3c2g	-0.854803	2.27129	-3.94274	0.00151216	0.0674263	-1.0124
Baiap2l2	-1.62992	-1.83216	-3.93855	0.00152455	0.0678148	-1.02021
Ugt3a1	0.562108	6.42722	3.93562	0.00153328	0.0680392	-1.02567
Phlpp2	-0.698604	2.15271	-3.92948	0.00155175	0.0686834	-1.03713
Eda2r	2.7333	-0.828343	3.92833	0.00155524	0.0686834	-1.03928
Kcnn1	0.639468	1.98116	3.92574	0.00156313	0.0688397	-1.04412
Abtb2	0.694802	3.71353	3.92351	0.00156996	0.0688397	-1.04829
Pik3ap1	-0.574739	6.43203	-3.92208	0.00157432	0.0688397	-1.05095
Grpel1	-0.324252	6.9346	-3.92188	0.00157495	0.0688397	-1.05133
Fam214b	0.400212	4.32589	3.92108	0.00157742	0.0688397	-1.05283
Pnldc1	1.77316	2.21385	3.91744	0.00158866	0.0690325	-1.05962
Chmp4c	-0.818266	1.41272	-3.91722	0.00158932	0.0690325	-1.06002
Tnfaip8l1	0.676743	5.27314	3.91562	0.00159431	0.0690866	-1.06302
Fam110a	0.934785	1.32411	3.91237	0.00160446	0.069364	-1.06909
Rnf187	0.383075	6.43565	3.90741	0.00162006	0.0697468	-1.07835
Nup155	-0.396409	4.06948	-3.90676	0.00162212	0.0697468	-1.07956
Clec4e	2.83214	-1.75356	3.90596	0.00162465	0.0697468	-1.08105
Ak7	2.29601	-1.59918	3.90464	0.00162884	0.0697641	-1.08351
Hbs1l	-0.38489	5.50526	-3.90163	0.00163846	0.0700138	-1.08915
Ralgapa2	-0.740344	5.32392	-3.89982	0.00164425	0.0700991	-1.09253
St6galnac6	0.448666	5.56704	3.89832	0.00164908	0.0701428	-1.09533
Xlr4a	3.41818	-2.1838	3.89526	0.00165898	0.0704017	-1.10105
Gch1	-0.492913	7.10308	-3.89296	0.00166644	0.0705562	-1.10535
Mir7085	-1.75737	-2.31656	-3.89083	0.00167337	0.0706301	-1.10932
Ddc	0.496998	5.94736	3.89008	0.00167584	0.0706301	-1.11073
Syngap1	0.960354	0.846152	3.8852	0.0016919	0.0710676	-1.11985
1810058I24Rik	0.710098	6.15073	3.88459	0.00169392	0.0710676	-1.12099
Pomt1	0.508942	4.05577	3.87832	0.00171479	0.0715547	-1.1327
Uqcrfs1	-0.311789	7.25258	-3.87547	0.00172436	0.0715547	-1.13802
Sptlc3	3.50936	-2.47568	3.87523	0.00172518	0.0715547	-1.13848
Cep41	0.58414	1.37488	3.87281	0.00173335	0.0715547	-1.143
Bco2	0.555127	4.60316	3.87236	0.00173489	0.0715547	-1.14385
Fga	-0.534211	12.2403	-3.87215	0.00173561	0.0715547	-1.14425
Gm8016	2.42886	-1.79737	3.87151	0.00173776	0.0715547	-1.14543
Poglut3	0.637233	2.86518	3.87085	0.00174003	0.0715547	-1.14668
Nudt18	0.598607	3.52523	3.86953	0.0017445	0.0715547	-1.14913
Gtf2h3	0.40084	3.56712	3.86879	0.00174704	0.0715547	-1.15053
Rspo3	0.562612	2.23715	3.86846	0.00174817	0.0715547	-1.15114
Mreg	0.575902	5.04291	3.86594	0.00175678	0.0717482	-1.15584
Gp1bb	1.21334	-2.93473	3.86481	0.00176068	0.0717488	-1.15796
Msmo1	-1.37141	5.36074	-3.86295	0.00176711	0.071852	-1.16145
1700008J07Rik	0.745953	1.22975	3.85623	0.00179049	0.0724947	-1.17402
Ttc39b	-0.559485	4.7545	-3.85586	0.00179178	0.0724947	-1.17471
Ppargc1a	-1.28987	2.89159	-3.85503	0.00179469	0.0724947	-1.17626
Dusp19	0.59532	1.85504	3.84825	0.00181866	0.0733025	-1.18895
Fndc10	1.22805	-0.825991	3.84317	0.0018368	0.0738721	-1.19843
Tfdp2	-0.976653	2.33623	-3.83958	0.00184978	0.0740818	-1.20517
Tsc22d1	1.08171	5.74097	3.8395	0.00185004	0.0740818	-1.2053
Slc9a8	-0.313888	5.10822	-3.83443	0.00186849	0.0744871	-1.21479
Slc2a5	0.662765	2.06702	3.83423	0.00186922	0.0744871	-1.21516
F2r	0.648657	4.94995	3.8334	0.00187226	0.0744871	-1.21672
Lvrn	-1.485	-3.18946	-3.8303	0.00188366	0.0747791	-1.22252
Hif3a	-1.85343	-2.91124	-3.82755	0.00189384	0.0747971	-1.22767
Marveld2	-0.599014	3.44788	-3.82714	0.00189537	0.0747971	-1.22845
Parp16	0.557265	4.17543	3.82664	0.0018972	0.0747971	-1.22937
Tmem35b	0.507087	2.71341	3.82581	0.00190032	0.0747971	-1.23094
Zfp945	-0.893526	2.82394	-3.82432	0.00190587	0.0748561	-1.23373
Ace2	-1.26481	0.962734	-3.81901	0.00192578	0.0754776	-1.24366
Prkar1a	-0.326067	7.00233	-3.81614	0.00193662	0.0757414	-1.24902
Ugt2b34	0.415781	8.76719	3.81398	0.00194485	0.0758138	-1.25308
H1f3	2.10687	-0.759247	3.8135	0.00194668	0.0758138	-1.25398
Rbms1	-0.496541	5.16935	-3.81242	0.00195079	0.0758139	-1.25599
Fbxl20	-0.360112	5.56186	-3.80938	0.00196244	0.0761065	-1.26169
Ghdc	0.340978	4.19246	3.80807	0.00196751	0.0761429	-1.26415
Gm11696	0.732657	-0.964696	3.80699	0.00197165	0.0761435	-1.26616
Lad1	0.910612	3.06075	3.80554	0.00197727	0.0762011	-1.26888
Miga2	0.567574	5.97768	3.80369	0.00198444	0.0762267	-1.27234
Tuba8	-1.89545	0.906585	-3.80257	0.00198882	0.0762267	-1.27445
Rusc1	0.677682	2.70589	3.80218	0.00199032	0.0762267	-1.27517
Tab3	-0.445871	2.8533	-3.79727	0.00200958	0.076805	-1.28437
Vwa1	1.18528	-0.771757	3.79409	0.00202212	0.0771245	-1.29032
Fmo4	-1.01146	2.95606	-3.78974	0.00203946	0.0775607	-1.29848
Rhpn2	-0.519575	4.3207	-3.78771	0.0020476	0.0775607	-1.30229
Slc30a2	1.96638	-2.97434	3.78709	0.00205007	0.0775607	-1.30344
Gabrb3	1.31741	0.974248	3.78702	0.00205036	0.0775607	-1.30357
C330018D20Rik	1.56436	2.81869	3.78515	0.00205789	0.0776192	-1.30707
Hsf2bp	1.80608	-1.246	3.78455	0.00206032	0.0776192	-1.3082
Scap	-0.471154	6.90766	-3.7814	0.00207307	0.077907	-1.3141
Bet1	0.364495	5.09107	3.78058	0.0020764	0.077907	-1.31563
Ankrd2	1.44359	-1.1764	3.77751	0.00208894	0.0780939	-1.32139
Alyref2	0.651194	1.55676	3.77729	0.00208984	0.0780939	-1.3218
Sdr9c7	0.959619	5.03079	3.77594	0.00209537	0.0781135	-1.32432
Clcn6	-0.868006	1.83783	-3.77253	0.00210946	0.0781135	-1.33073
Olfml1	0.563133	3.44409	3.77226	0.00211055	0.0781135	-1.33122
Dtx3l	0.391844	5.6862	3.77188	0.00211214	0.0781135	-1.33194
Akr1b7	-2.65479	-2.16514	-3.7713	0.00211454	0.0781135	-1.33302
Pid1	0.519216	6.64237	3.77101	0.00211575	0.0781135	-1.33357
Wdr6	-0.566812	3.75383	-3.76859	0.00212581	0.0783283	-1.33811
Tbccd1	0.571158	4.40613	3.76442	0.00214325	0.0788135	-1.34591
Klhl22	0.424497	3.85788	3.76323	0.00214826	0.0788408	-1.34814
Malt1	-1.10654	1.82813	-3.76147	0.00215572	0.0789577	-1.35146
Zfp36l1	0.804805	7.49419	3.76018	0.00216117	0.0790005	-1.35387
Myorg	0.481265	5.51177	3.75733	0.00217331	0.0791568	-1.35922
Dusp10	0.736784	2.20184	3.75679	0.0021756	0.0791568	-1.36023
Slc17a8	1.22019	4.74345	3.75615	0.00217831	0.0791568	-1.36141
Gm14432	-0.888871	0.762085	-3.7537	0.00218884	0.0793831	-1.36602
Steap2	-0.906587	2.91455	-3.75056	0.00220234	0.079716	-1.37189
Clec2h	-1.50515	3.03056	-3.74862	0.00221076	0.0798641	-1.37554
Epc2	-0.342331	3.7066	-3.74613	0.00222161	0.0800994	-1.38022
Serpina12	2.48562	5.01315	3.74239	0.00223795	0.0801188	-1.38722
Gm3055	0.791897	-0.161877	3.74221	0.00223876	0.0801188	-1.38756
Slco1a4	-1.75567	5.08517	-3.74186	0.00224029	0.0801188	-1.38821
Plin4	1.64463	6.26211	3.74176	0.00224071	0.0801188	-1.38839
Tiam2	0.693591	3.32653	3.74042	0.00224663	0.0801188	-1.39091
5033406O09Rik	0.737621	2.48601	3.73977	0.00224949	0.0801188	-1.39213
Agbl5	-0.421586	2.93716	-3.73908	0.00225253	0.0801188	-1.39342
Tmed5	-0.578488	6.09667	-3.73306	0.00227931	0.0806382	-1.40471
Slc37a4	-0.646321	6.60521	-3.73239	0.00228235	0.0806382	-1.40598
Pnkd	0.646623	7.39555	3.73215	0.00228342	0.0806382	-1.40643
Ube2e3	-0.569586	4.43456	-3.73188	0.0022846	0.0806382	-1.40692
Mindy4	-0.698304	1.34793	-3.72987	0.00229365	0.0806773	-1.4107
Sdhd	-0.275712	7.51629	-3.72969	0.00229445	0.0806773	-1.41103
Rflnb	-0.471476	0.344969	-3.72831	0.00230069	0.0807429	-1.41363
E230015B07Rik	1.85093	-3.18072	3.727	0.0023066	0.0807966	-1.41607
Ormdl3	0.398001	6.74925	3.72481	0.00231656	0.080992	-1.42019
Dgkg	1.37568	-3.48148	3.72262	0.00232655	0.0811873	-1.4243
Rmdn3	0.426259	5.95078	3.71887	0.00234377	0.0816338	-1.43134
Ifrd1	-0.587741	3.5993	-3.7173	0.00235098	0.0817057	-1.43428
Herc1	-0.378655	5.60684	-3.7165	0.00235468	0.0817057	-1.43578
Saa2	3.19678	5.30571	3.7144	0.00236442	0.0817101	-1.43972
Nat1	0.635981	0.639788	3.71436	0.00236458	0.0817101	-1.43978
Gtpbp8	0.41488	3.89437	3.71361	0.00236809	0.0817101	-1.4412
Ucp3	2.48577	-3.18574	3.70894	0.0023899	0.0823087	-1.44995
Cyp3a57	1.1002	-4.01429	3.70477	0.00240959	0.0827318	-1.45779
Lin7a	0.406847	3.28774	3.70349	0.00241566	0.0827318	-1.46019
Nedd1	-0.38096	3.73234	-3.70309	0.00241753	0.0827318	-1.46093
Dlgap3	-2.3653	-3.33401	-3.70255	0.00242011	0.0827318	-1.46195
4930505N22Rik	-1.42113	-2.93377	-3.70019	0.00243139	0.0829637	-1.46639
Scamp5	0.584962	4.27696	3.69688	0.00244722	0.08335	-1.47258
LOC102639762	-1.14272	0.78654	-3.69499	0.00245632	0.0834935	-1.47613
Igfbp2	-1.33509	8.69657	-3.69327	0.00246464	0.0834935	-1.47936
Hmgn3	0.974757	-0.582161	3.6932	0.002465	0.0834935	-1.4795
Nol3	1.89202	-0.138818	3.68873	0.00248677	0.0840765	-1.48789
Lpgat1	0.334309	7.26066	3.68374	0.00251128	0.0847498	-1.49725
Ptk2b	0.435657	5.59482	3.68258	0.00251701	0.0847672	-1.49943
Wnt2b	-0.606355	0.511927	-3.68178	0.00252098	0.0847672	-1.50093
Mrps2	0.333201	5.22936	3.67775	0.00254104	0.0852867	-1.5085
Nudt9	0.318159	5.5289	3.67355	0.00256212	0.0858379	-1.51638
H3c7	1.50921	-3.61541	3.67029	0.00257859	0.0859973	-1.5225
Hsd3b2	0.908244	5.93084	3.66992	0.00258048	0.0859973	-1.5232
Cntln	-0.944288	0.13732	-3.66914	0.00258441	0.0859973	-1.52465
Fus	-0.534879	6.251	-3.66893	0.00258551	0.0859973	-1.52505
Hook1	-0.60304	5.16082	-3.66747	0.0025929	0.086088	-1.52778
Mup1	2.23045	7.67484	3.66582	0.00260135	0.0862137	-1.53089
Tbkbp1	0.50149	2.97052	3.66433	0.002609	0.0862562	-1.53369
Lrp2bp	-0.814273	-0.306376	-3.66367	0.00261239	0.0862562	-1.53492
Mras	0.836346	2.09067	3.66234	0.0026192	0.0862562	-1.53741
Col7a1	-1.03765	-1.03568	-3.66171	0.00262247	0.0862562	-1.5386
Xcl1	2.04219	-2.50481	3.6606	0.00262821	0.0862562	-1.54069
Slc13a2	-2.64537	-0.112227	-3.65928	0.00263505	0.0862562	-1.54317
Trpm6	-2.42743	-2.31702	-3.65922	0.00263535	0.0862562	-1.54328
Apon	0.356831	8.44186	3.65663	0.00264883	0.0865413	-1.54814
Tctex1d2	0.740331	-0.235012	3.65574	0.00265343	0.0865413	-1.5498
Bag2	-0.79283	0.957001	-3.65448	0.00266003	0.0865823	-1.55217
Epb41l5	-0.729634	4.91497	-3.65368	0.00266423	0.0865823	-1.55368
Tle3	0.87569	3.72114	3.65282	0.00266876	0.0865823	-1.5553
Esyt1	0.415262	4.24716	3.65017	0.00268269	0.0868814	-1.56026
Ces1c	-0.350977	11.3549	-3.64504	0.00270991	0.0875743	-1.5699
Mrm2	0.687066	2.68701	3.64435	0.00271357	0.0875743	-1.57118
Eipr1	0.519077	3.3702	3.64015	0.00273612	0.0881479	-1.57908
Paics	-0.53694	6.9365	-3.63857	0.00274462	0.0882678	-1.58204
Kctd17	0.76954	1.83907	3.63571	0.00276012	0.0886119	-1.58741
Serpinf1	-0.335287	8.94461	-3.6294	0.00279465	0.0894851	-1.59927
Dph1	-0.856175	3.87841	-3.62897	0.00279701	0.0894851	-1.60008
Cd300lf	-0.938304	0.748386	-3.62781	0.00280339	0.0895289	-1.60225
Gm15348	2.27704	-2.65873	3.62696	0.00280809	0.0895289	-1.60385
Zbtb14	0.58015	3.04042	3.62489	0.00281958	0.0896108	-1.60774
Smarca4	0.469819	5.90882	3.62475	0.00282036	0.0896108	-1.60801
Coa4	0.638625	2.54728	3.62345	0.00282756	0.0896115	-1.61044
Gm7694	0.599125	2.72717	3.623	0.00283009	0.0896115	-1.61129
Dkk3	1.0695	1.251	3.62106	0.00284091	0.0898001	-1.61493
Vmac	0.531209	3.71133	3.61761	0.00286029	0.0901587	-1.62142
Copz2	0.5372	3.97116	3.6173	0.00286202	0.0901587	-1.62199
Abcb9	1.05875	1.28311	3.61325	0.00288493	0.0907254	-1.6296
H2bc15	1.31967	-1.62128	3.60994	0.00290378	0.0911628	-1.63581
Kdm5a	-0.506476	4.28562	-3.60869	0.00291098	0.0912306	-1.63817
Fcmr	-1.18513	-0.515214	-3.60739	0.00291843	0.0912306	-1.64061
Cxcl1	1.44304	2.9794	3.60572	0.00292802	0.0912306	-1.64373
Serf1	0.546215	1.93973	3.60572	0.00292805	0.0912306	-1.64374
Hspa4l	0.752696	4.35253	3.60527	0.00293065	0.0912306	-1.64459
Ehhadh	-0.908321	9.33577	-3.60095	0.00295569	0.0918554	-1.6527
Mgme1	0.517807	2.96423	3.59924	0.00296568	0.0920108	-1.65592
Ffar2	2.09486	-3.03789	3.59728	0.00297714	0.0920917	-1.6596
Nr2c1	-0.762011	3.3185	-3.59709	0.00297826	0.0920917	-1.65996
Tmem136	0.701053	0.316223	3.59429	0.0029947	0.0924452	-1.66521
Tcta	0.480774	4.42147	3.59108	0.00301373	0.0928773	-1.67125
Smo	0.727658	3.01984	3.58946	0.00302334	0.093018	-1.67428
Dcbld2	-1.12268	0.827599	-3.5882	0.00303088	0.0930891	-1.67665
Diaph2	-0.359517	3.84121	-3.58738	0.00303573	0.0930891	-1.67818
Slc25a19	0.485167	3.65746	3.58306	0.00306174	0.0936926	-1.68631
Hnrnpk	-0.38046	6.88423	-3.58242	0.00306556	0.0936926	-1.6875
Ly6d	2.21248	2.2711	3.57572	0.00310632	0.0946512	-1.70009
Ppard	0.920242	2.38582	3.57558	0.00310718	0.0946512	-1.70036
Poll	0.419354	2.94017	3.57462	0.00311304	0.0946532	-1.70215
Smim13	-0.434157	4.75512	-3.5739	0.00311751	0.0946532	-1.70352
Ppfibp1	-0.555614	5.28491	-3.5722	0.00312796	0.0948147	-1.70671
Cubn	-1.04556	-0.0909352	-3.57088	0.00313608	0.0949049	-1.70918
Cd276	-1.13135	1.60419	-3.56882	0.00314889	0.0951367	-1.71306
Pomk	0.627936	2.85856	3.56785	0.00315486	0.0951613	-1.71487
Cygb	0.618414	3.20324	3.56662	0.00316252	0.0952369	-1.71718
Nr1i2	-0.472793	6.64293	-3.56405	0.00317861	0.0955655	-1.72202
Yod1	-0.888985	3.52657	-3.56074	0.00319941	0.0960344	-1.72823
Tmem8	0.547746	4.63696	3.55854	0.00321333	0.0962954	-1.73237
Sox6os	1.06148	0.547056	3.55733	0.00322097	0.0963681	-1.73463
Lgals8	0.398847	7.12837	3.55537	0.00323345	0.0965163	-1.73832
Fam117a	-0.765954	0.893133	-3.55491	0.00323638	0.0965163	-1.73918
Spns2	0.876193	4.51317	3.55219	0.00325383	0.0968369	-1.7443
Bmp7	1.02494	1.25953	3.55151	0.00325815	0.0968369	-1.74557
Sdsl	-0.872111	2.8852	-3.5503	0.00326596	0.0968369	-1.74785
Mosmo	-0.414873	3.64873	-3.54932	0.00327229	0.0968369	-1.74969
LOC115487571	-0.999706	-3.18176	-3.54915	0.00327336	0.0968369	-1.75001
Cpeb1	0.746929	2.2721	3.54803	0.00328064	0.0968971	-1.75212
Gm13056	1.93125	-2.8456	3.54705	0.00328695	0.0969282	-1.75395
Zfp750	-0.76006	3.86031	-3.5456	0.0032964	0.097052	-1.75669
Rpl32	-0.410276	7.40289	-3.5438	0.00330811	0.0972415	-1.76007
Lef1	-1.76045	-2.46277	-3.54092	0.00332691	0.0976387	-1.76547
Pla2g15	0.596328	3.6759	3.53978	0.00333441	0.0977036	-1.76761
Casp3	-0.563563	3.98439	-3.53458	0.00336881	0.0985551	-1.77739
Tap2	0.385515	4.24169	3.53375	0.0033743	0.0985594	-1.77894
Amotl2	0.493156	5.13143	3.53164	0.0033884	0.0986948	-1.78291
Tafa5	0.875574	1.03264	3.53146	0.00338962	0.0986948	-1.78326
Fabp5	-1.94725	3.89725	-3.52959	0.00340209	0.0988071	-1.78675
Aldoc	-0.943406	2.87201	-3.52928	0.00340419	0.0988071	-1.78734
Ppp1r13b	-0.382835	4.16567	-3.52839	0.00341017	0.0988254	-1.78901
Dhx36	-0.388436	5.05223	-3.52742	0.00341674	0.0988604	-1.79084
Vps37b	0.487828	4.17844	3.52487	0.00343396	0.0992032	-1.79563
Fas	0.364737	4.37626	3.52212	0.00345263	0.0995868	-1.8008
Nsun2	-0.345543	6.10425	-3.52116	0.00345914	0.099619	-1.80259
Nsmce2	-0.349415	3.00266	-3.51994	0.0034675	0.0996417	-1.80489
Lrrc47	1.46696	3.89	3.51852	0.00347726	0.0996417	-1.80757
Igsf8	-0.489661	2.78932	-3.51847	0.00347761	0.0996417	-1.80766
Serpinb6b	0.951063	2.14509	3.5179	0.00348152	0.0996417	-1.80873
Mitf	0.996367	1.48307	3.51624	0.00349293	0.0998133	-1.81185
Stard13	0.442543	4.80578	3.51419	0.00350705	0.100062	-1.81569
Cxcr1	1.53382	-3.12774	3.51024	0.00353449	0.100535	-1.82311
Hnrnpl	-0.468524	6.3258	-3.51024	0.00353453	0.100535	-1.82312
1700055D18Rik	0.731026	0.634866	3.50763	0.00355276	0.100899	-1.82802
Ppip5k1	0.583345	2.23426	3.50558	0.00356713	0.101151	-1.83186
Kcnj2	1.2274	-0.10415	3.50368	0.00358052	0.101375	-1.83543
Srsf12	1.2495	-3.89796	3.50023	0.00360503	0.101913	-1.84193
Zbtb2	-0.427565	2.73139	-3.49424	0.00364786	0.102821	-1.85317
Cyp2c67	-0.525528	8.06717	-3.49321	0.00365529	0.102821	-1.85511
Mfsd12	0.531509	2.86799	3.49318	0.00365554	0.102821	-1.85517
Chn1	2.16131	-2.1257	3.49263	0.00365947	0.102821	-1.85619
G6pc2	-1.99995	-3.37783	-3.49187	0.00366502	0.102821	-1.85764
Rmnd1	0.61464	4.97764	3.49017	0.00367733	0.102947	-1.86083
Clip2	0.873091	2.04613	3.48971	0.00368067	0.102947	-1.86169
Acaca	-0.606781	5.98679	-3.4885	0.00368944	0.103036	-1.86396
Sugct	0.462207	5.43794	3.48706	0.00369995	0.103137	-1.86666
Mmd	0.421476	7.70877	3.48641	0.00370472	0.103137	-1.86789
Zdhhc20	-0.578834	3.33106	-3.48572	0.00370979	0.103137	-1.86919
Mme	1.00731	4.98787	3.48299	0.00372976	0.103351	-1.8743
Syngr3	-1.39139	-2.9957	-3.48296	0.00373001	0.103351	-1.87437
Erg28	-0.537798	5.54215	-3.48087	0.00374547	0.103351	-1.8783
Trim37	0.350588	3.55241	3.48036	0.0037492	0.103351	-1.87925
Ccdc3	1.42102	0.629189	3.47922	0.00375766	0.103351	-1.8814
Gm32540	-2.17875	0.488716	-3.47905	0.00375889	0.103351	-1.88171
Actl6a	-0.380461	3.95721	-3.47877	0.00376098	0.103351	-1.88224
Vps13a	-0.34733	3.29957	-3.47774	0.00376867	0.103351	-1.88418
Gtf3c5	0.522073	2.91149	3.47735	0.00377155	0.103351	-1.88491
Cutal	0.487325	5.14646	3.47709	0.0037735	0.103351	-1.8854
Tmem185a	0.360439	3.79909	3.4737	0.00379882	0.103836	-1.89176
Actn1	-0.626711	4.69387	-3.47322	0.00380244	0.103836	-1.89267
Anxa2	1.5018	4.48	3.47223	0.00380986	0.103885	-1.89452
Gm36199	1.6364	-3.31668	3.46852	0.00383791	0.104315	-1.9015
2700099C18Rik	1.27765	-1.91083	3.46829	0.00383959	0.104315	-1.90192
Prickle3	0.899108	1.93681	3.4679	0.0038426	0.104315	-1.90267
Alas2	0.514853	6.7838	3.4668	0.00385093	0.104388	-1.90473
Fam210b	0.285984	7.04916	3.46523	0.00386288	0.104448	-1.90767
Nhlrc1	1.25808	0.429409	3.46432	0.00386986	0.104448	-1.90939
Mmaa	0.457395	4.39675	3.464	0.00387229	0.104448	-1.90999
Shfl	0.569988	6.24101	3.46325	0.00387804	0.104448	-1.9114
Ugt1a10	-2.80031	-1.21718	-3.46234	0.00388498	0.104448	-1.9131
Apom	-0.766419	7.63146	-3.46207	0.0038871	0.104448	-1.91362
Nat8f5	1.30325	2.87384	3.46131	0.00389291	0.104452	-1.91504
E2f2	1.12548	0.281095	3.45873	0.00391275	0.104688	-1.91988
Mb21d2	0.392196	3.98954	3.45698	0.0039263	0.104688	-1.92317
Fcho1	-0.981503	-0.844335	-3.45564	0.00393676	0.104688	-1.9257
Nr2c2	-1.37599	3.27299	-3.4556	0.00393706	0.104688	-1.92577
Slc13a4	2.69189	-1.23107	3.45544	0.00393832	0.104688	-1.92607
9130023H24Rik	0.674225	1.85788	3.45416	0.00394822	0.104688	-1.92846
Ccl4	2.44509	-2.48171	3.45346	0.00395369	0.104688	-1.92978
Shld2	-0.730478	4.86431	-3.45338	0.00395437	0.104688	-1.92994
Rps4x	-0.347421	7.73672	-3.45214	0.00396404	0.104688	-1.93227
Cyp3a11	-0.969743	11.8823	-3.4515	0.00396904	0.104688	-1.93347
Tmc6	0.632855	3.01088	3.45137	0.00397005	0.104688	-1.93371
Gorasp1	0.474277	4.89725	3.44999	0.00398089	0.104688	-1.9363
Pdxk-ps	1.07391	-4.01712	3.44994	0.00398129	0.104688	-1.9364
Gramd3	-0.440951	5.38619	-3.44969	0.00398328	0.104688	-1.93687
Tsc22d3	-1.22723	6.15311	-3.44895	0.00398912	0.104688	-1.93827
Camk1d	-0.711462	5.71685	-3.44852	0.00399244	0.104688	-1.93906
Cep85l	-0.493047	4.64578	-3.44625	0.00401044	0.104851	-1.94334
Tmem271	1.12873	-4.00234	3.44615	0.00401123	0.104851	-1.94352
Rbm3	-0.615724	5.05044	-3.44558	0.00401569	0.104851	-1.94458
Pus7	0.520299	3.18475	3.44337	0.00403328	0.105162	-1.94874
Cnpy3	0.546894	4.98507	3.44263	0.00403922	0.105168	-1.95014
4930556M19Rik	0.667195	2.85001	3.44065	0.004055	0.105385	-1.95385
S1pr2	0.7106	2.38409	3.43925	0.00406627	0.105385	-1.95649
Prex2	0.774817	2.28041	3.43764	0.00407921	0.105385	-1.95951
Snx33	0.379185	4.22925	3.43675	0.00408633	0.105385	-1.96116
Tnf	2.89626	-2.34451	3.43663	0.00408732	0.105385	-1.9614
Gm10364	1.46455	-3.47457	3.43632	0.00408986	0.105385	-1.96199
Kifc2	0.677832	3.48385	3.4361	0.00409165	0.105385	-1.9624
Tbc1d2b	-0.530584	5.30565	-3.4359	0.00409323	0.105385	-1.96277
Nudt4	0.300886	7.28243	3.4322	0.00412323	0.106009	-1.96971
Tut4	-0.658102	3.8205	-3.43051	0.00413703	0.106216	-1.97289
Caln1	0.777273	2.16669	3.42492	0.00418296	0.107163	-1.98339
Brwd3	-0.430291	2.43289	-3.42402	0.00419045	0.107163	-1.98509
Samd8	-2.87488	3.13132	-3.42342	0.00419535	0.107163	-1.9862
A730063M14Rik	0.765441	0.492812	3.42321	0.00419711	0.107163	-1.9866
Trim7	1.13752	3.46219	3.42191	0.00420795	0.107291	-1.98905
Rad54b	-1.34932	0.125228	-3.41979	0.00422558	0.107592	-1.99302
Pde4c	-0.723826	4.21843	-3.41893	0.00423274	0.107626	-1.99464
Lect2	0.697784	6.61936	3.41767	0.00424327	0.107745	-1.997
Ms4a10	-2.33621	-2.58307	-3.4165	0.0042531	0.107846	-1.9992
Slc25a43	1.32035	-3.53702	3.4139	0.00427504	0.108254	-2.00409
C730002L08Rik	1.64287	0.672326	3.40888	0.00431764	0.109119	-2.01351
Nrep	1.3466	3.36363	3.40848	0.00432101	0.109119	-2.01425
Rpl4	-0.320415	9.00866	-3.40671	0.00433623	0.109353	-2.01759
Gpr173	1.86517	-3.51787	3.40574	0.00434448	0.109392	-2.0194
Shc2	2.66403	-2.47748	3.4045	0.00435514	0.109392	-2.02173
Tnrc6b	-0.396709	5.1013	-3.40446	0.00435554	0.109392	-2.02182
Brat1	0.466026	3.38898	3.40373	0.00436179	0.1094	-2.02318
Rgl3	0.524526	4.51861	3.40273	0.00437041	0.109468	-2.02506
Slc6a13	-0.345481	7.82947	-3.40052	0.00438957	0.109629	-2.02921
Tmx4	-0.426681	3.87742	-3.4002	0.00439229	0.109629	-2.0298
Kif21a	-0.6113	5.40591	-3.39965	0.00439707	0.109629	-2.03084
Slc25a21	0.551036	3.35834	3.39924	0.00440062	0.109629	-2.0316
Hps3	-0.545595	2.60079	-3.39765	0.00441449	0.10973	-2.03459
Anxa9	0.879102	0.0857162	3.39742	0.00441655	0.10973	-2.03504
Abhd3	0.451368	5.77408	3.3938	0.00444823	0.110306	-2.04183
Dip2c	-0.779674	3.82555	-3.39341	0.00445168	0.110306	-2.04256
Tor3a	0.857266	3.82601	3.39201	0.00446399	0.110463	-2.04519
Ovol3	1.67683	-2.14689	3.38877	0.00449264	0.111023	-2.05127
Zfp872	1.39504	0.495515	3.38715	0.00450707	0.111069	-2.05431
H4c9	1.08215	0.499079	3.3868	0.00451014	0.111069	-2.05496
Vac14	0.49103	4.64619	3.38653	0.00451255	0.111069	-2.05547
C77080	-0.396402	6.17749	-3.38375	0.00453747	0.111534	-2.0607
Fzd5	0.691572	2.81321	3.38225	0.00455091	0.111591	-2.06351
Inmt	-0.810341	8.83231	-3.38214	0.00455191	0.111591	-2.06372
Swsap1	0.679895	2.40874	3.38144	0.00455817	0.111597	-2.06502
Daglb	0.351803	4.48876	3.37974	0.00457355	0.111746	-2.06822
Mup18	1.56952	9.0394	3.37942	0.00457638	0.111746	-2.06881
Prg4	0.951516	4.50492	3.37745	0.00459425	0.112034	-2.07251
Kdm3a	-0.375732	4.19204	-3.37636	0.00460416	0.112111	-2.07456
Fubp3	-0.46155	3.97184	-3.37577	0.00460954	0.112111	-2.07567
Pim1	1.24601	3.88192	3.37211	0.00464298	0.112775	-2.08253
Glyctk	0.47807	8.04885	3.36632	0.00469648	0.113925	-2.09341
Tjp3	0.631863	5.05225	3.36502	0.00470853	0.113948	-2.09585
Qdpr	-0.520611	7.17339	-3.36424	0.00471577	0.113948	-2.09731
Shroom2	-1.41388	3.7483	-3.36422	0.00471593	0.113948	-2.09734
Mvk	-0.910681	3.19942	-3.36354	0.00472232	0.113953	-2.09862
Gstt2	-0.780566	6.2245	-3.36239	0.00473303	0.114062	-2.10078
Nup210	-0.582272	3.9275	-3.35998	0.00475568	0.114459	-2.10531
Ccdc126	0.796452	0.278263	3.35787	0.00477557	0.114788	-2.10927
Samd12	0.899739	-1.16647	3.35669	0.00478669	0.114855	-2.11148
Zfp629	0.823669	3.45856	3.35587	0.00479442	0.114855	-2.11301
Gm34121	0.797888	-0.263241	3.35548	0.00479811	0.114855	-2.11374
Blm	-1.25089	0.785094	-3.35494	0.00480327	0.114855	-2.11476
Atf4	0.751821	6.64034	3.35343	0.00481758	0.115049	-2.11759
Setmar	-0.421407	1.88567	-3.35253	0.00482623	0.115106	-2.11929
Serpina7	1.43291	5.95373	3.35049	0.0048457	0.115421	-2.12311
Unc5cl	-1.59191	-3.39999	-3.34889	0.004861	0.115637	-2.12611
Gdap2	-0.418116	4.62763	-3.34628	0.00488613	0.115913	-2.131
Elp6	0.763357	2.26485	3.34615	0.00488741	0.115913	-2.13125
Taf2	-0.478206	4.06841	-3.34574	0.00489144	0.115913	-2.13203
Atg2b	-0.530835	4.90036	-3.33905	0.00495647	0.117286	-2.14457
Hmgcs1	-1.13761	6.82429	-3.33833	0.00496353	0.117286	-2.14592
Oasl1	0.61685	3.93938	3.33783	0.00496844	0.117286	-2.14685
Tm2d3	-0.647345	3.71542	-3.33574	0.00498907	0.117523	-2.15079
Nab1	-0.37753	5.81781	-3.33552	0.00499122	0.117523	-2.1512
Pabpc4	-0.473424	4.78082	-3.33296	0.00501652	0.117968	-2.15599
Lgalsl	0.744214	4.113	3.33157	0.00503035	0.118103	-2.15861
Cyb561d1	0.447307	2.62926	3.33109	0.00503506	0.118103	-2.15949
Samm50	-0.288077	5.94886	-3.32974	0.00504854	0.118269	-2.16203
Ceacam1	-0.349018	7.58902	-3.32669	0.00507907	0.118756	-2.16775
Lpar1	0.887404	0.342388	3.32611	0.00508485	0.118756	-2.16883
Ldb3	1.83846	-1.44098	3.32573	0.00508871	0.118756	-2.16955
Uox	-0.51145	10.5369	-3.32461	0.00510001	0.118756	-2.17166
Pofut1	0.270481	3.87371	3.32378	0.00510834	0.118756	-2.1732
Sbk1	0.701955	4.3249	3.32339	0.00511235	0.118756	-2.17395
Tnfrsf4	0.951909	-1.36804	3.32319	0.00511437	0.118756	-2.17432
S100pbp	-0.458485	3.87325	-3.32192	0.00512714	0.118903	-2.17669
1700030K09Rik	0.509843	1.94572	3.32031	0.00514348	0.118999	-2.17971
Acyp1	0.612238	2.17513	3.32025	0.00514416	0.118999	-2.17984
Dnajb14	0.307831	4.05153	3.31823	0.00516473	0.11918	-2.18362
Mup-ps16	1.31002	3.97293	3.31821	0.00516488	0.11918	-2.18365
Trip10	0.401335	3.32157	3.3173	0.00517427	0.119247	-2.18537
Rdh16f2	-0.838139	6.74094	-3.31522	0.00519556	0.119588	-2.18927
Stard4	-0.736211	5.6696	-3.31358	0.00521241	0.119827	-2.19234
Rnps1	-0.279221	4.164	-3.3118	0.00523076	0.119967	-2.19567
Lpp	-0.318135	5.63884	-3.31081	0.00524099	0.119967	-2.19752
Emc8	0.402297	4.29886	3.30998	0.00524965	0.119967	-2.19909
Cbs	-0.472134	8.65743	-3.30915	0.00525821	0.119967	-2.20064
Cyp3a25	-0.628015	9.05715	-3.30895	0.00526036	0.119967	-2.20102
Entpd2	0.551425	1.82286	3.3086	0.00526394	0.119967	-2.20167
Ep400	-0.33129	5.37981	-3.30757	0.00527472	0.119967	-2.20361
Tex30	-0.616908	1.76755	-3.30736	0.00527686	0.119967	-2.20399
Tsc22d4	-0.513169	3.53259	-3.30735	0.00527698	0.119967	-2.20402
Ghr	0.349873	8.64971	3.3042	0.00530995	0.120442	-2.20992
Ercc5	-0.340841	4.29665	-3.30411	0.00531092	0.120442	-2.21009
Zfp13	-0.839296	-0.363438	-3.30074	0.00534637	0.121097	-2.2164
Reps1	-0.415716	4.18503	-3.29533	0.00540385	0.122185	-2.22654
Amdhd1	-0.565984	7.72236	-3.29489	0.00540863	0.122185	-2.22738
Rgs12	0.759757	1.74492	3.29419	0.00541611	0.122185	-2.22869
Dnph1	1.05825	1.92594	3.29366	0.0054217	0.122185	-2.22967
Pgrmc2	0.284155	5.9988	3.29313	0.00542748	0.122185	-2.23068
Usp6nl	-0.658183	5.04299	-3.29117	0.0054485	0.122508	-2.23435
Ms4a4b	-1.09475	0.401236	-3.28989	0.00546226	0.122668	-2.23674
Pnrc2	0.36499	5.47099	3.28832	0.00547925	0.1229	-2.23968
Ackr2	2.40105	-0.56211	3.28664	0.00549755	0.123161	-2.24284
B3gntl1	0.319444	1.75633	3.28506	0.00551467	0.123345	-2.24579
Igfbp1	-1.52381	6.15604	-3.28436	0.00552233	0.123345	-2.24711
Pkmyt1	-1.24898	-0.346857	-3.28404	0.00552579	0.123345	-2.2477
Agxt	-0.791904	7.892	-3.28033	0.00556649	0.124033	-2.25465
Zfp41	0.723011	1.13844	3.28001	0.00557008	0.124033	-2.25527
Ccl27a	0.607519	2.50063	3.27894	0.00558184	0.124145	-2.25726
A730008H23Rik	0.571833	6.9231	3.27637	0.00561023	0.124602	-2.26207
Kbtbd11	1.33044	1.31583	3.27554	0.00561945	0.124602	-2.26363
Wdr89	0.553281	0.796283	3.2748	0.00562771	0.124602	-2.26502
Zc3h14	-0.317819	5.05718	-3.27465	0.00562938	0.124602	-2.2653
Dhrs1	0.456624	6.66995	3.27177	0.00566146	0.125134	-2.27069
Cd6	-1.29147	-1.25958	-3.27084	0.00567187	0.125134	-2.27243
Mlec	0.614414	7.10163	3.26908	0.00569168	0.125134	-2.27573
Usp28	-0.590773	2.90072	-3.26862	0.00569682	0.125134	-2.27659
Pold1	0.434261	1.74026	3.26741	0.00571052	0.125134	-2.27886
Adamtsl1	-2.02904	-1.32579	-3.26648	0.00572105	0.125134	-2.28061
Dmrta1	2.01662	-1.19376	3.26629	0.00572318	0.125134	-2.28096
Caprin1	0.639795	7.32016	3.26602	0.00572622	0.125134	-2.28147
Fam214a	0.519985	6.25291	3.26556	0.00573142	0.125134	-2.28232
Cyp4a32	-0.738811	6.25099	-3.26506	0.00573709	0.125134	-2.28326
Prrx1	1.30738	-0.497803	3.26502	0.00573752	0.125134	-2.28333
Pias2	-0.384194	4.57805	-3.26471	0.00574106	0.125134	-2.28392
Rnf26	0.304477	3.5474	3.26467	0.00574153	0.125134	-2.28399
Abhd4	0.505707	5.61875	3.25921	0.00580376	0.126187	-2.29421
Saa1	2.84648	6.54216	3.2591	0.00580511	0.126187	-2.29443
Slc25a47	-0.59934	9.37169	-3.25864	0.00581033	0.126187	-2.29528
Ccdc134	1.03128	2.53807	3.25802	0.00581751	0.126194	-2.29645
Mettl23	0.553189	3.4986	3.25633	0.00583699	0.12638	-2.29962
Nt5c3	-0.331261	4.07969	-3.25567	0.00584455	0.12638	-2.30084
Rab29	0.451913	3.10631	3.25532	0.00584862	0.12638	-2.3015
Mrc2	1.30074	0.534274	3.25433	0.00586006	0.12638	-2.30335
Gm16731	2.06955	0.0657113	3.25344	0.00587036	0.12638	-2.30502
Sephs1	-0.392279	4.92905	-3.25218	0.00588504	0.12638	-2.30738
Gm30505	-0.797156	1.79364	-3.25164	0.00589128	0.12638	-2.30839
Acp2	0.340681	5.84834	3.2511	0.00589761	0.12638	-2.3094
Vps18	0.296908	3.86195	3.25071	0.00590213	0.12638	-2.31013
2410131K14Rik	0.518685	2.94645	3.25068	0.00590246	0.12638	-2.31018
Pgpep1	0.471581	5.73057	3.25054	0.00590419	0.12638	-2.31046
LOC102637720	1.66756	-2.91927	3.2485	0.005928	0.12638	-2.31427
Prepl	0.388951	4.87289	3.24838	0.00592935	0.12638	-2.31449
Gm10804	-1.47416	0.775198	-3.24761	0.00593848	0.12638	-2.31594
Cenpu	-2.17846	-2.0002	-3.24718	0.00594347	0.12638	-2.31674
Lpin3	-0.565282	2.409	-3.24696	0.0059461	0.12638	-2.31716
Crtam	-1.1824	-3.90358	-3.24678	0.00594814	0.12638	-2.31748
Arid4b	-0.656398	3.73319	-3.24669	0.00594928	0.12638	-2.31767
Gbp10	0.912353	4.35556	3.24598	0.00595759	0.126411	-2.31899
Kank1	0.403424	5.75637	3.24364	0.00598523	0.126851	-2.32337
AA986860	-1.5028	1.05385	-3.24156	0.00600986	0.127227	-2.32726
Slc25a45	0.670243	4.51386	3.2403	0.00602491	0.1274	-2.32963
Zkscan5	0.40374	3.76642	3.23828	0.00604899	0.127675	-2.3334
Fn3krp	0.435542	2.93731	3.23805	0.00605176	0.127675	-2.33384
Stard3nl	0.495251	2.60047	3.23635	0.00607212	0.127824	-2.33702
Gpr180	0.306095	4.35592	3.2363	0.00607269	0.127824	-2.33711
Acy3	0.554943	5.63768	3.23526	0.00608513	0.12794	-2.33904
Dlat	-0.495085	5.30155	-3.23467	0.00609224	0.127944	-2.34015
Stx1b	0.813947	3.80138	3.23388	0.00610181	0.127999	-2.34164
Grin3b	2.30099	-1.82258	3.23156	0.00612989	0.128203	-2.34598
Nid2	-0.900308	2.96338	-3.23119	0.00613435	0.128203	-2.34667
2310040G24Rik	0.694682	1.03864	3.23092	0.00613757	0.128203	-2.34717
Robo3	1.36136	-1.13126	3.23078	0.00613931	0.128203	-2.34744
Acvr1b	0.576259	3.71843	3.22969	0.00615252	0.128334	-2.34947
Unc13a	0.983744	1.29815	3.22749	0.00617938	0.128749	-2.3536
Naa10	-0.320421	4.12534	-3.22461	0.00621457	0.129222	-2.35897
Mfsd14a	-0.243664	4.75171	-3.22449	0.00621607	0.129222	-2.3592
Chd1	-0.449856	4.75696	-3.22322	0.00623167	0.129298	-2.36157
Ptger1	1.35305	0.0565785	3.22299	0.00623452	0.129298	-2.362
Dgkd	-0.299149	4.64254	-3.22186	0.00624854	0.129298	-2.36413
Pex2	0.328822	4.94497	3.22045	0.00626591	0.129298	-2.36676
Gm13807	1.13351	-1.71114	3.22042	0.00626628	0.129298	-2.36681
Rps24	-0.387921	7.45961	-3.22022	0.00626884	0.129298	-2.3672
Ces1b	-0.477583	6.41981	-3.21979	0.00627408	0.129298	-2.36799
Pcnt	-0.410131	3.65106	-3.21965	0.0062758	0.129298	-2.36825
Neu2	1.241	0.795417	3.21768	0.00630037	0.129465	-2.37195
Atp6v0a2	0.442646	5.14508	3.21759	0.0063014	0.129465	-2.3721
Acnat2	1.23	5.59564	3.21731	0.00630492	0.129465	-2.37263
Tcf19	0.435827	0.924225	3.21569	0.00632511	0.129519	-2.37566
Cxcl2	1.7377	-1.53915	3.21569	0.00632515	0.129519	-2.37566
Zfp976	-0.468704	2.0618	-3.21519	0.00633145	0.129519	-2.3766
Ddx3x	-0.525395	7.05822	-3.21485	0.00633561	0.129519	-2.37723
Nfe2l3	-1.79175	-1.21657	-3.21242	0.00636619	0.13	-2.38178
Nup160	-0.380337	2.59854	-3.20789	0.0064234	0.130875	-2.39025
Etaa1	0.493011	2.01815	3.20761	0.00642696	0.130875	-2.39077
Itih2	-0.549842	10.1579	-3.20735	0.00643031	0.130875	-2.39126
Rpl22l1	-0.764956	3.19907	-3.20367	0.00647726	0.131685	-2.39815
Frmd8	0.327197	3.85997	3.20251	0.00649207	0.131841	-2.40031
Purg	0.581372	0.857303	3.19916	0.00653521	0.132571	-2.40657
Leap2	0.661515	5.31661	3.19812	0.00654862	0.13258	-2.40851
Zfp189	-0.522296	2.59154	-3.19802	0.00654998	0.13258	-2.40871
Lamb3	1.08998	3.21511	3.19239	0.00662325	0.133732	-2.41923
Sdhaf3	-0.285361	2.54855	-3.19219	0.00662582	0.133732	-2.4196
4930525G20Rik	-0.975559	-1.52962	-3.19198	0.00662863	0.133732	-2.42
Chpf	0.968216	1.1827	3.18831	0.00667684	0.134557	-2.42685
Prkaca	0.407598	5.87938	3.181	0.00677398	0.13613	-2.44051
Dnajb2	0.397585	4.92234	3.18096	0.00677456	0.13613	-2.44059
Cdip1	-0.4308	6.67114	-3.18077	0.00677701	0.13613	-2.44093
Glo1	0.33944	7.70498	3.17925	0.00679747	0.136393	-2.44378
Selenom	0.514864	0.903083	3.17754	0.00682041	0.136704	-2.44697
Nf2	0.334172	5.06539	3.17435	0.00686354	0.137237	-2.45292
Gm11266	1.31793	0.856519	3.17423	0.00686515	0.137237	-2.45315
Erbin	-0.574693	5.51807	-3.17393	0.00686931	0.137237	-2.45372
Lif	1.25726	-3.85067	3.17304	0.00688139	0.13733	-2.45538
Trim14	0.65693	3.34733	3.17248	0.006889	0.137334	-2.45642
Cbln3	0.770958	0.283727	3.17062	0.00691439	0.137691	-2.4599
Slc23a2	-0.564974	4.99476	-3.16868	0.00694091	0.13807	-2.46352
Adamts6	-0.876797	0.989933	-3.16603	0.00697728	0.138637	-2.46846
Osbpl2	0.285821	4.94289	3.16505	0.00699089	0.138637	-2.4703
Cdhr2	-1.27957	0.797618	-3.16497	0.00699194	0.138637	-2.47044
Sptbn2	-0.46424	6.6482	-3.16397	0.00700573	0.138761	-2.4723
Cpxm2	0.987467	-1.07058	3.16202	0.00703276	0.139069	-2.47594
Lpcat4	-1.333	-0.716803	-3.16177	0.00703634	0.139069	-2.47642
Dll1	-0.719138	1.8883	-3.15882	0.0070774	0.139631	-2.48192
Spata13	-0.449812	4.68391	-3.15853	0.00708147	0.139631	-2.48247
Mir22	-2.81354	-2.93438	-3.1581	0.00708746	0.139631	-2.48327
Ginm1	0.272108	4.8803	3.15637	0.00711171	0.13996	-2.48649
Cd300lb	1.50873	0.854836	3.15573	0.00712082	0.13999	-2.4877
Nfkbia	-0.620023	4.97491	-3.15512	0.00712939	0.140009	-2.48884
Cabin1	-0.335487	4.49181	-3.15282	0.00716184	0.140147	-2.49313
Rpl15	-0.407385	6.40783	-3.15267	0.00716394	0.140147	-2.49341
Twf2	0.54215	1.21012	3.15256	0.00716545	0.140147	-2.49361
Slc2a13	-1.09297	-1.29019	-3.15194	0.0071742	0.140147	-2.49476
Brip1	-0.784063	0.73049	-3.15193	0.00717437	0.140147	-2.49478
Atg4a	0.416984	3.50269	3.15103	0.00718717	0.140189	-2.49646
Ptprk	-0.497175	5.86206	-3.15071	0.00719173	0.140189	-2.49706
Cbx8	0.453017	2.48124	3.14919	0.00721331	0.140462	-2.49989
Dlg1	-0.548064	4.95785	-3.14746	0.00723799	0.140794	-2.50312
Rtn2	1.78863	-1.32758	3.14626	0.00725523	0.140981	-2.50537
Nfkbiz	0.37004	3.23555	3.14519	0.00727049	0.141027	-2.50735
Slc26a10	1.2178	2.70363	3.14503	0.00727289	0.141027	-2.50766
Klhl12	-0.290426	3.94426	-3.14372	0.00729173	0.141063	-2.51011
Gca	-0.823698	1.53171	-3.14345	0.00729563	0.141063	-2.51061
Rps12	-0.459494	6.17991	-3.14285	0.00730422	0.141063	-2.51172
Hsd17b6	-1.25015	7.70372	-3.14239	0.0073109	0.141063	-2.51259
Ticam1	0.58459	4.2916	3.14224	0.00731298	0.141063	-2.51286
Pcdhb9	1.26293	-3.46733	3.14128	0.00732697	0.141186	-2.51466
6430571L13Rik	0.794113	-0.114552	3.14073	0.00733486	0.14119	-2.51568
Mrvi1	0.632195	1.28176	3.13772	0.00737859	0.141884	-2.52129
Mup14	2.68871	8.29572	3.13659	0.0073951	0.142054	-2.5234
Laptm4b	0.517604	4.34144	3.13586	0.00740579	0.142111	-2.52476
Sorcs2	-1.96623	-2.7729	-3.1336	0.00743888	0.142582	-2.52897
Fam221a	-1.40565	-3.15696	-3.13313	0.00744577	0.142582	-2.52985
Gm15551	1.55482	-3.60377	3.13169	0.00746696	0.142839	-2.53253
Pex11a	0.679314	7.39186	3.13062	0.00748282	0.142922	-2.53454
Zfp791	-0.487893	0.459123	-3.1301	0.00749052	0.142922	-2.53551
Frs3os	0.770429	-1.40093	3.12965	0.0074972	0.142922	-2.53635
Klc2	0.310307	3.11266	3.12886	0.00750893	0.142922	-2.53782
Olfml3	1.14706	1.8836	3.12782	0.00752427	0.142922	-2.53975
Pcdhb16	-1.38407	-2.61831	-3.12776	0.00752514	0.142922	-2.53986
Atp11a	1.20353	3.86807	3.12774	0.00752547	0.142922	-2.5399
Efna5	0.717328	2.07884	3.12234	0.00760612	0.144268	-2.54996
Trmt5	0.429565	2.72605	3.12195	0.00761199	0.144268	-2.55069
B430212C06Rik	3.56736	-2.45201	3.12128	0.00762215	0.144313	-2.55195
Ptbp2	-0.510202	3.04796	-3.12014	0.00763938	0.144383	-2.55408
Ropn1l	-0.63131	2.79925	-3.11936	0.00765102	0.144383	-2.55552
H2bc4	0.527993	6.91108	3.11907	0.0076554	0.144383	-2.55606
Trpm4	0.632966	0.999544	3.11896	0.00765715	0.144383	-2.55627
Ppp1r3c	1.10539	6.57405	3.11799	0.00767181	0.144512	-2.55808
Mir290a	-1.30071	-3.09366	-3.1155	0.00770964	0.145058	-2.56272
Vps29	0.435558	4.69049	3.1149	0.00771875	0.145058	-2.56384
Zkscan7	0.585874	3.74871	3.11453	0.0077244	0.145058	-2.56453
Tpgs2	0.407787	2.64658	3.11216	0.00776058	0.14559	-2.56894
Mir7022	0.998437	-3.92741	3.10971	0.00779821	0.146009	-2.5735
Gm10389	-1.79444	-3.0061	-3.10968	0.00779872	0.146009	-2.57356
Gga2	0.527019	3.62394	3.10767	0.00782981	0.146442	-2.57732
Creb3l2	0.857483	4.77711	3.10612	0.00785368	0.146694	-2.58019
Tmem117	-1.58067	-3.09995	-3.10577	0.0078592	0.146694	-2.58085
Fdft1	-0.891914	5.97589	-3.10496	0.00787166	0.146779	-2.58235
1700030C10Rik	1.47306	-0.159148	3.10303	0.00790182	0.146957	-2.58595
Med14	-0.363881	3.57423	-3.1029	0.00790389	0.146957	-2.5862
Pck1	-0.887117	11.2122	-3.10267	0.00790741	0.146957	-2.58662
Chrna2	0.689538	3.92865	3.10196	0.00791844	0.146957	-2.58794
Ebf3	-1.62977	-3.92023	-3.1018	0.00792105	0.146957	-2.58825
Hnrnpll	-0.311523	4.31055	-3.10055	0.00794059	0.147172	-2.59057
Setd1a	-0.399556	5.56504	-3.09885	0.00796724	0.147518	-2.59373
Gria1	-0.766151	-4.2081	-3.09771	0.00798528	0.147559	-2.59586
Mup7	3.10337	10.9344	3.0977	0.00798543	0.147559	-2.59588
Pprc1	-0.737326	3.67412	-3.09574	0.00801636	0.147982	-2.59953
D630045J12Rik	0.555756	2.50259	3.09425	0.0080399	0.148268	-2.60229
Col4a5	-1.53787	-0.317855	-3.0927	0.00806462	0.148439	-2.60519
Crybg2	1.08658	0.877525	3.09246	0.00806846	0.148439	-2.60564
Sc5d	-0.39708	8.29599	-3.09215	0.00807328	0.148439	-2.6062
Afg1l	0.633128	3.60836	3.08822	0.00813625	0.149448	-2.61353
Rps3	-0.356001	7.80932	-3.08578	0.00817544	0.150018	-2.61806
Lrit1	-0.472164	3.91975	-3.0846	0.00819449	0.150219	-2.62025
Ccdc157	0.488982	4.35488	3.08169	0.00824182	0.15077	-2.62568
G0s2	1.35786	7.70509	3.08133	0.00824759	0.15077	-2.62634
E130311K13Rik	0.669224	2.17479	3.08124	0.00824906	0.15077	-2.62651
Mfn1	-0.2517	5.57986	-3.0802	0.00826598	0.15093	-2.62844
Invs	0.430477	3.69473	3.07825	0.00829793	0.151363	-2.63208
Snd1	-0.362908	6.47161	-3.07767	0.00830737	0.151386	-2.63315
Vil1	-0.953105	1.95386	-3.07662	0.00832464	0.151452	-2.63511
Ube2o	0.432525	3.78385	3.07645	0.00832742	0.151452	-2.63542
Entpd5	0.720839	7.86458	3.0759	0.00833639	0.151466	-2.63644
Nadsyn1	-0.319903	4.49657	-3.07466	0.00835693	0.15169	-2.63876
Rack1	-0.365675	7.79285	-3.07356	0.0083751	0.15173	-2.6408
Cacybp	0.479173	4.93393	3.07353	0.00837554	0.15173	-2.64085
Sh3bgrl	0.265603	6.0926	3.07247	0.0083931	0.151899	-2.64283
Aff4	-0.404913	5.95135	-3.07185	0.00840341	0.151936	-2.64398
Cc2d1b	0.402907	3.62991	3.07135	0.0084117	0.151937	-2.64491
Itih1	-0.342914	9.50975	-3.07066	0.00842313	0.151995	-2.64619
Smim3	0.858054	-0.366838	3.06945	0.00844324	0.152087	-2.64844
Wt1os	0.725187	-4.22176	3.06936	0.00844468	0.152087	-2.6486
Ccne2	0.745997	0.435165	3.06824	0.00846348	0.152265	-2.6507
Pank3	-0.37154	5.35338	-3.06778	0.00847109	0.152265	-2.65154
Rnase13	0.999961	0.0588954	3.067	0.00848416	0.152313	-2.653
Pald1	-0.45714	3.6915	-3.06597	0.00850138	0.152313	-2.65491
Plaat3	-0.523228	2.50798	-3.06578	0.00850463	0.152313	-2.65527
Lrrc59	0.350772	6.29317	3.06528	0.00851296	0.152313	-2.65619
Zfp275	-0.490577	3.03289	-3.06516	0.00851501	0.152313	-2.65642
2010003K11Rik	0.953788	4.59652	3.06293	0.00855263	0.152727	-2.66057
Ccdc151	0.757089	1.00237	3.06266	0.00855708	0.152727	-2.66106
Mettl17	0.491196	3.72212	3.06231	0.00856298	0.152727	-2.66171
Lbhd1	0.441475	2.93816	3.06168	0.00857366	0.15277	-2.66289
Zcchc9	-0.363432	3.30184	-3.06053	0.00859314	0.15297	-2.66502
Olfr1036	0.765715	-4.04986	3.0574	0.00864633	0.153768	-2.67084
Hmgxb3	-0.380697	4.13301	-3.05561	0.00867697	0.154088	-2.67417
Gm17399	1.91211	-3.03799	3.05537	0.00868102	0.154088	-2.67461
Atg7	0.477064	5.27576	3.05469	0.00869273	0.154148	-2.67588
Zfp335	-0.289644	4.4668	-3.05368	0.00871009	0.154307	-2.67776
Cd7	1.12786	-0.0348998	3.05187	0.00874115	0.154709	-2.68111
Ephb2	2.17364	-1.2541	3.05082	0.0087594	0.154773	-2.68307
Gys1	0.350762	1.36291	3.0507	0.0087615	0.154773	-2.6833
Apoo	-0.283261	3.96283	-3.04846	0.00880026	0.155004	-2.68746
Irf1	0.559206	5.06901	3.04832	0.00880265	0.155004	-2.68771
Cdt1	-0.843447	0.831632	-3.04811	0.00880638	0.155004	-2.68811
1700109H08Rik	-0.802913	0.115093	-3.048	0.00880819	0.155004	-2.68831
Gadd45b	-1.5279	2.9096	-3.0468	0.00882905	0.155078	-2.69053
Psme2b	-0.571012	3.8726	-3.04679	0.00882922	0.155078	-2.69055
Tpmt	0.491104	5.60187	3.04628	0.00883812	0.155087	-2.6915
Adra1a	0.680663	2.80112	3.04496	0.00886112	0.155343	-2.69395
Bbs10	0.393158	2.35626	3.04398	0.00887828	0.155496	-2.69577
Asxl2	-0.541375	3.76228	-3.04277	0.00889959	0.155722	-2.69803
Cidec	2.50912	3.80078	3.03956	0.00895604	0.156405	-2.70398
Tecr	-0.345231	6.88497	-3.03902	0.00896562	0.156405	-2.70499
Rcbtb2	0.340475	5.07495	3.03896	0.00896658	0.156405	-2.70509
Pbld2	0.346672	7.56946	3.03863	0.00897256	0.156405	-2.70572
Capg	1.01489	1.27662	3.03812	0.00898143	0.156413	-2.70665
Sash3	-0.712221	1.228	-3.03527	0.0090322	0.157146	-2.71195
Dock4	-0.324706	4.48181	-3.0348	0.00904058	0.157146	-2.71283
Fam216a	0.563781	1.53988	3.03399	0.00905505	0.15725	-2.71433
Smurf1	-0.536721	4.4166	-3.03257	0.00908035	0.157393	-2.71696
Slc1a4	1.124	2.38827	3.03257	0.00908038	0.157393	-2.71696
Por	-0.61547	8.06169	-3.02805	0.00916157	0.158262	-2.72534
Twnk	0.324939	5.01659	3.02802	0.00916216	0.158262	-2.7254
Mir328	1.10028	-3.62752	3.02798	0.00916284	0.158262	-2.72547
Mettl16	0.289553	3.81925	3.02788	0.00916477	0.158262	-2.72567
Lrrc49	-1.68163	-1.92825	-3.0256	0.00920608	0.158796	-2.7299
F2	-0.249547	10.7766	-3.02488	0.00921901	0.158796	-2.73122
Mir3060	-1.00939	-2.82886	-3.02475	0.00922152	0.158796	-2.73148
Dhx34	0.437297	3.04815	3.02351	0.00924397	0.158954	-2.73376
Bcr	0.32406	5.16353	3.02329	0.00924794	0.158954	-2.73417
Tnrc18	0.273736	5.07666	3.02131	0.00928425	0.158991	-2.73786
Cdca4	-0.40574	1.87761	-3.02096	0.00929059	0.158991	-2.7385
Perp	0.317977	6.62127	3.02076	0.0092942	0.158991	-2.73886
Epha2	0.650337	4.92928	3.02045	0.00930001	0.158991	-2.73945
Slc4a7	-0.911905	2.23713	-3.02027	0.0093032	0.158991	-2.73978
Nrip1	0.487399	3.50532	3.01997	0.00930872	0.158991	-2.74033
Rfesd	0.542282	2.74834	3.01958	0.00931597	0.158991	-2.74106
Eif2ak4	-0.383277	3.30381	-3.01826	0.00934025	0.158991	-2.74351
Cyp4f40	-1.45979	-3.05581	-3.01823	0.00934074	0.158991	-2.74356
Kif5b	-0.346543	4.54386	-3.01817	0.00934179	0.158991	-2.74367
Sestd1	-0.482988	1.60259	-3.01749	0.00935435	0.158991	-2.74493
Nlrc3	-0.765803	-0.643902	-3.01729	0.00935808	0.158991	-2.74531
Tmf1	-0.314284	4.01945	-3.01687	0.00936589	0.158991	-2.74609
Zfp11	0.723674	0.792264	3.01661	0.00937066	0.158991	-2.74657
Pptc7	-0.37757	4.16631	-3.01449	0.00940991	0.15951	-2.7505
Frat1	0.646985	2.66693	3.01312	0.00943537	0.15967	-2.75305
Ofd1	-0.447371	2.06548	-3.013	0.00943755	0.15967	-2.75326
Rad18	-0.965801	0.513645	-3.01258	0.00944526	0.15967	-2.75403
Slc47a1	0.530344	6.84144	3.01199	0.00945638	0.159712	-2.75514
Coq8b	-0.335651	3.84427	-3.01081	0.0094784	0.15981	-2.75733
Zfp46	1.59014	2.20146	3.01075	0.00947949	0.15981	-2.75743
Terb1	-0.66633	-4.24137	-3.00986	0.0094961	0.159902	-2.75908
Ufsp1	0.677428	1.28182	3.00862	0.00951936	0.159902	-2.76138
Trf	-0.35078	13.2977	-3.00845	0.0095226	0.159902	-2.7617
Zyg11a	-0.727061	2.45556	-3.00766	0.00953744	0.159902	-2.76317
Ppp1r13l	0.577194	2.27232	3.0074	0.00954234	0.159902	-2.76365
Fahd1	0.337601	5.53594	3.00711	0.00954772	0.159902	-2.76418
Papss2	-0.738454	6.945	-3.00676	0.00955428	0.159902	-2.76483
Snora73b	-1.3173	-3.62643	-3.00667	0.00955593	0.159902	-2.76499
A230083G16Rik	0.877563	0.596702	3.00551	0.00957779	0.159902	-2.76714
Rapgef5	-1.1749	2.02356	-3.00523	0.00958317	0.159902	-2.76767
Stx3	0.289098	3.07191	3.00465	0.0095941	0.159902	-2.76874
Atad3a	-0.30999	5.95366	-3.00434	0.00959997	0.159902	-2.76931
Eps8l3	-1.52165	-1.62964	-3.00429	0.00960097	0.159902	-2.76941
Slc25a18	-1.86079	-3.24714	-3.00401	0.00960623	0.159902	-2.76993
Snrnp200	-0.390869	6.2565	-3.00005	0.00968156	0.160927	-2.77727
Zranb1	-0.388615	5.49249	-2.99985	0.00968528	0.160927	-2.77763
Gm26628	-1.33738	-1.94967	-2.99811	0.00971861	0.161336	-2.78086
Golph3l	0.577161	3.08109	2.99676	0.00974441	0.161512	-2.78335
Klra13-ps	-1.66303	-3.00154	-2.99664	0.00974672	0.161512	-2.78358
Txndc17	0.245896	5.77714	2.99517	0.00977508	0.161726	-2.78631
Tex12	1.08785	-1.01927	2.99506	0.00977718	0.161726	-2.78651
Galnt10	0.461676	2.77262	2.99362	0.00980485	0.162039	-2.78917
Nudt1	0.360622	3.55381	2.99289	0.00981904	0.162128	-2.79053
Zswim8	-0.263269	5.60372	-2.99153	0.00984546	0.162394	-2.79305
Smu1	-0.246584	5.64513	-2.99109	0.00985399	0.162394	-2.79387
Cby1	0.461378	2.75393	2.9907	0.00986151	0.162394	-2.79458
Zdhhc8	0.386156	3.22137	2.98939	0.00988705	0.162592	-2.79702
Gm21992	-0.83324	0.603254	-2.98876	0.0098993	0.162592	-2.79818
BC025920	0.543736	0.550139	2.98859	0.00990258	0.162592	-2.79849
Myo7b	-1.54875	-0.926083	-2.98827	0.00990875	0.162592	-2.79908
Pdk2	0.38763	6.6902	2.98747	0.00992444	0.162704	-2.80056
Nufip2	-0.386648	4.58007	-2.98636	0.00994616	0.162806	-2.80262
Plcb1	-0.424236	3.11222	-2.98625	0.00994825	0.162806	-2.80282
Gnat2	-1.7906	-1.23288	-2.98578	0.00995746	0.162812	-2.80368
Slc41a2	0.855517	4.51482	2.98439	0.00998476	0.1631	-2.80626
Gm44805	1.58344	6.58408	2.98399	0.00999276	0.1631	-2.80701
M5C1000I18Rik	1.23708	-4.05113	2.98323	0.0100077	0.163143	-2.80842
2810414N06Rik	0.53507	1.82943	2.98296	0.010013	0.163143	-2.80891
Glrx2	-0.540457	3.70951	-2.98154	0.0100411	0.163344	-2.81155
1700045H11Rik	-1.67645	-2.36638	-2.98143	0.0100431	0.163344	-2.81173
Gsta4	-0.645949	6.07274	-2.9805	0.0100617	0.163419	-2.81347
Kat2b	-0.476247	6.193	-2.97994	0.0100728	0.163419	-2.81451
Zfp273	0.431255	1.08192	2.97986	0.0100743	0.163419	-2.81464
Coro1c	-0.306139	4.52329	-2.97873	0.0100968	0.163586	-2.81674
Snai3	-1.64142	-3.45547	-2.97845	0.0101023	0.163586	-2.81725
Mdc1	0.350963	3.65384	2.97746	0.010122	0.163654	-2.81909
Acsl4	-0.576781	4.46448	-2.97735	0.0101242	0.163654	-2.81929
Hspa9	-0.353829	8.921	-2.9759	0.0101532	0.16398	-2.82198
Endod1	1.02235	2.24125	2.97379	0.0101955	0.164265	-2.82588
Gemin2	-0.373312	3.48904	-2.97345	0.0102022	0.164265	-2.8265
Clca4b	-1.15624	1.31768	-2.97341	0.0102032	0.164265	-2.82659
Pcmt1	-0.368437	4.63757	-2.97262	0.010219	0.164265	-2.82804
Snord15b	-1.35048	-2.73745	-2.97207	0.0102301	0.164265	-2.82906
Rtn4rl1	0.38665	3.88324	2.97173	0.0102369	0.164265	-2.82969
Rufy4	0.648186	0.876049	2.97172	0.010237	0.164265	-2.8297
Gsto1	-0.297296	6.19514	-2.97147	0.0102421	0.164265	-2.83016
Ddx46	-0.282869	5.56673	-2.96795	0.0103134	0.165265	-2.83668
Gucy1a2	-0.874094	-3.78394	-2.96625	0.010348	0.165415	-2.83983
Mgst2	-0.947535	-1.54398	-2.96583	0.0103565	0.165415	-2.84059
Smc3	-0.305637	4.18236	-2.96574	0.0103583	0.165415	-2.84076
Bcs1l	0.385186	3.33532	2.96573	0.0103586	0.165415	-2.84079
AA465934	1.44328	-1.97568	2.96391	0.0103958	0.165664	-2.84416
Mup12	4.22761	10.5581	2.96337	0.0104069	0.165664	-2.84516
Klhdc1	-1.81262	-2.77114	-2.96193	0.0104364	0.165664	-2.84781
Wdr91	0.441935	4.43316	2.96191	0.0104367	0.165664	-2.84784
Rnf169	-0.387254	5.63038	-2.96162	0.0104427	0.165664	-2.84838
Cnep1r1	0.261526	3.61209	2.9615	0.0104452	0.165664	-2.84861
Ccnt2	-0.531857	4.51108	-2.96138	0.0104475	0.165664	-2.84882
LOC115490316	1.18707	-3.81382	2.96137	0.0104479	0.165664	-2.84885
Lrrc73	1.20841	-3.74707	2.96102	0.010455	0.165664	-2.84949
Gm10548	-1.1449	-3.42289	-2.95971	0.0104821	0.165951	-2.85192
5430405H02Rik	-0.88204	1.51093	-2.9578	0.0105216	0.16625	-2.85545
Akap9	-0.293336	5.03244	-2.95774	0.0105228	0.16625	-2.85556
Birc6	-0.312849	6.01257	-2.95746	0.0105285	0.16625	-2.85606
4930599N23Rik	-1.50395	-3.24119	-2.95705	0.010537	0.16625	-2.85682
Rpl12	-0.573861	6.95294	-2.95385	0.0106037	0.16704	-2.86275
Ankrd12	0.446597	2.1616	2.95378	0.0106051	0.16704	-2.86287
Cyp2c55	-1.27811	1.87176	-2.95181	0.0106462	0.167187	-2.8665
Sinhcaf	-0.882624	0.463048	-2.95177	0.0106471	0.167187	-2.86658
Rnf111	-0.275833	4.60471	-2.95173	0.0106481	0.167187	-2.86667
Map2k3os	0.458059	0.181095	2.9516	0.0106507	0.167187	-2.8669
Abcg5	-0.458622	6.63126	-2.95031	0.0106778	0.167317	-2.86929
8430430B14Rik	0.876411	-4.17135	2.95023	0.0106795	0.167317	-2.86943
Klk1b4	-0.632387	1.43968	-2.94991	0.0106862	0.167317	-2.87002
Gdf15	1.65623	3.99423	2.94935	0.010698	0.167324	-2.87106
Ap3s1	0.332413	4.99646	2.94885	0.0107085	0.167324	-2.87198
G6pc	-0.636355	8.8445	-2.94778	0.010731	0.167324	-2.87395
Sirt5	0.31736	3.46299	2.94777	0.0107313	0.167324	-2.87397
Cdk8	-0.266965	4.62876	-2.94774	0.010732	0.167324	-2.87403
Tmem102	0.458968	3.05774	2.94634	0.0107616	0.167518	-2.87662
Usp9x	-0.283656	6.40066	-2.94629	0.0107626	0.167518	-2.8767
Celsr1	0.593379	3.87075	2.94546	0.0107801	0.167591	-2.87824
Tnfrsf10b	1.2084	-1.45861	2.94521	0.0107854	0.167591	-2.87869
Smc6	-0.38632	3.97123	-2.94438	0.0108031	0.167598	-2.88023
Map7d1	0.368149	5.17709	2.94414	0.0108083	0.167598	-2.88068
Ddx21	-0.445706	5.19073	-2.94381	0.0108153	0.167598	-2.88129
Kctd6	-0.343051	2.96194	-2.94348	0.0108222	0.167598	-2.88189
Rcan2	0.947172	2.6925	2.94276	0.0108376	0.167651	-2.88322
Atf7	-0.879895	4.87228	-2.94247	0.0108438	0.167651	-2.88376
Tbc1d8	-0.588993	4.11597	-2.93934	0.0109108	0.168547	-2.88954
AW112010	0.364152	6.37735	2.93824	0.0109343	0.168769	-2.89156
Pdpk1	-0.434055	4.73256	-2.93727	0.0109553	0.16877	-2.89336
Grn	-0.528573	6.6065	-2.9372	0.0109568	0.16877	-2.89349
Ccdc85c	0.276765	3.78169	2.93696	0.0109618	0.16877	-2.89392
Rab3gap1	-0.352075	5.19494	-2.93618	0.0109789	0.168892	-2.89538
C2	-0.343357	6.48803	-2.93541	0.0109953	0.169004	-2.89678
Rpl7a	-0.690235	6.1855	-2.93443	0.0110166	0.16911	-2.8986
Krt20	-1.18471	1.27735	-2.93425	0.0110205	0.16911	-2.89893
Atp8b4	0.905514	0.832649	2.93284	0.0110512	0.16944	-2.90154
Shank2	-0.658252	3.96231	-2.9305	0.011102	0.170077	-2.90584
Uprt	-1.25698	-1.12148	-2.92922	0.0111302	0.170231	-2.90822
Pdhb	-0.286047	6.62606	-2.9292	0.0111305	0.170231	-2.90824
4931414P19Rik	0.541662	1.65837	2.92865	0.0111426	0.170275	-2.90926
Abcd1	0.539803	4.88925	2.92734	0.0111713	0.170411	-2.91168
Gja5	-0.737579	-0.549248	-2.92706	0.0111776	0.170411	-2.9122
Cplane2	-1.00636	-4.12803	-2.92698	0.0111792	0.170411	-2.91233
Arpin	0.584549	2.71727	2.92576	0.011206	0.170679	-2.91458
Pik3ca	-0.432989	4.65874	-2.92525	0.0112173	0.17071	-2.91553
8030462N17Rik	-0.312225	3.34086	-2.92407	0.0112433	0.170965	-2.9177
Impact	0.419442	3.78008	2.9227	0.0112737	0.171285	-2.92023
Gzmm	-1.61454	-2.71162	-2.92066	0.011319	0.1717	-2.92399
Cyp3a59	-1.15024	5.45295	-2.92064	0.0113195	0.1717	-2.92404
Tmem131l	-0.65979	4.77535	-2.91967	0.011341	0.171884	-2.92581
Tor1b	0.538507	4.364	2.91681	0.0114049	0.172471	-2.93108
Havcr1	1.1182	-4.09075	2.9153	0.0114389	0.172471	-2.93387
Enpp6	0.784328	0.851928	2.9153	0.011439	0.172471	-2.93388
Hspb6	0.461169	4.16976	2.91526	0.0114398	0.172471	-2.93395
Naprt	0.39906	6.13319	2.91512	0.011443	0.172471	-2.9342
Gstm7	-0.42197	5.55466	-2.9151	0.0114435	0.172471	-2.93425
Aass	-0.435281	8.14403	-2.91468	0.0114529	0.172471	-2.93502
Carhsp1	0.266423	6.56682	2.91461	0.0114545	0.172471	-2.93515
Serpina1a	-0.370365	12.5539	-2.91353	0.0114788	0.172535	-2.93713
Fam219b	0.370448	3.21972	2.91336	0.0114827	0.172535	-2.93745
Dbndd2	0.46581	2.40787	2.91161	0.0115223	0.172535	-2.94068
Il6ra	-0.846763	5.24333	-2.91143	0.0115262	0.172535	-2.941
AI413582	0.794743	1.18233	2.91089	0.0115385	0.172535	-2.94199
Cabp4	1.13583	-1.12491	2.91032	0.0115514	0.172535	-2.94305
Mcm2	0.727384	1.95719	2.91015	0.0115554	0.172535	-2.94336
Prrc1	0.298832	5.19634	2.90963	0.0115671	0.172535	-2.94431
Gm4956	-1.31691	2.49234	-2.90956	0.0115688	0.172535	-2.94445
1700022I11Rik	-0.477411	1.23349	-2.90949	0.0115704	0.172535	-2.94458
Acvr2b	-0.589565	0.707251	-2.90933	0.011574	0.172535	-2.94487
Strbp	-0.660541	5.12837	-2.9092	0.0115769	0.172535	-2.94511
Slc27a4	0.294633	5.37059	2.90888	0.0115843	0.172535	-2.94571
Grrp1	1.77239	-3.40094	2.90865	0.0115895	0.172535	-2.94613
Gin1	-0.340929	3.13935	-2.90798	0.0116047	0.172622	-2.94736
Zfp652	0.266291	5.43585	2.90711	0.0116247	0.172779	-2.94897
Timm44	-0.280632	4.93468	-2.90653	0.0116378	0.172835	-2.95002
Slc6a16	0.764028	2.16441	2.90576	0.0116555	0.172909	-2.95145
Prpf31	0.301711	3.94833	2.90511	0.0116705	0.172909	-2.95265
Txnl4b	0.291927	3.77943	2.90509	0.0116709	0.172909	-2.95269
Eif3i	-0.268821	6.19275	-2.9043	0.0116889	0.17299	-2.95413
Bin3	-0.480416	3.58747	-2.90352	0.011707	0.17299	-2.95558
Hes1	1.09584	2.84685	2.90303	0.0117181	0.17299	-2.95647
Arhgef26	-0.884389	5.172	-2.90272	0.0117253	0.17299	-2.95705
Med13l	-0.300587	3.92585	-2.90265	0.0117269	0.17299	-2.95717
Btg3	-0.974694	2.26073	-2.90234	0.011734	0.17299	-2.95774
Hhex	-0.895834	6.37299	-2.902	0.011742	0.17299	-2.95838
Sec14l2	0.328997	9.55187	2.90087	0.0117681	0.173015	-2.96046
Cul1	-0.221262	6.05059	-2.90072	0.0117716	0.173015	-2.96074
Gbp6	0.670749	4.11732	2.90052	0.0117761	0.173015	-2.9611
Lat	-0.944132	-0.2091	-2.89994	0.0117896	0.173015	-2.96217
Chic1	-1.16738	0.27241	-2.8999	0.0117905	0.173015	-2.96224
Fam228b	1.10019	-0.642748	2.89943	0.0118014	0.173037	-2.9631
Preb	-0.517161	6.04041	-2.89832	0.0118271	0.173044	-2.96514
Nrg1	1.34037	-0.947768	2.89784	0.0118383	0.173044	-2.96603
Zfp781	0.772994	-0.347291	2.8974	0.0118486	0.173044	-2.96685
Pfn4	2.07982	-1.89308	2.89713	0.0118549	0.173044	-2.96734
Fam53b	0.849194	3.36257	2.89691	0.0118599	0.173044	-2.96774
Mnt	0.709574	3.23425	2.89675	0.0118638	0.173044	-2.96804
Gpr63	-1.3371	-3.93532	-2.89659	0.0118675	0.173044	-2.96833
Tcp11l2	-0.558548	4.39058	-2.89516	0.0119009	0.17314	-2.97097
Pced1a	0.423467	4.06328	2.89492	0.0119065	0.17314	-2.97141
Opa3	0.304568	5.46206	2.89455	0.0119151	0.17314	-2.97209
Lpcat3	-0.365545	6.48707	-2.89433	0.0119203	0.17314	-2.97249
Mtmr4	0.542029	5.92125	2.8943	0.011921	0.17314	-2.97255
Foxa3	-0.542576	5.49525	-2.89223	0.0119696	0.173709	-2.97636
Eef1aknmt	-0.482302	3.31547	-2.89174	0.0119811	0.17374	-2.97726
Pfn2	0.640415	1.42625	2.89131	0.0119911	0.173748	-2.97804
Spatc1	0.818581	-4.19062	2.89061	0.0120076	0.173851	-2.97933
Cpt1b	0.416467	3.22188	2.88902	0.0120452	0.17392	-2.98226
Fh1	-0.410453	7.38943	-2.88898	0.012046	0.17392	-2.98232
Brd1	-0.292923	4.73339	-2.88885	0.0120493	0.17392	-2.98258
Adamtsl5	0.8218	-0.637192	2.88856	0.0120562	0.17392	-2.98311
Ccnjl	1.36921	-2.09234	2.88837	0.0120606	0.17392	-2.98346
Cpne2	0.411562	3.69275	2.88802	0.0120689	0.17392	-2.9841
Plp1	0.991405	0.32987	2.88757	0.0120796	0.173939	-2.98493
Litaf	0.305497	6.11618	2.88695	0.0120944	0.174016	-2.98607
Abca4	-1.57174	-2.75452	-2.88584	0.0121207	0.174142	-2.98811
Saa3	1.3499	2.75756	2.88563	0.0121257	0.174142	-2.9885
Isoc1	0.296452	6.50265	2.88539	0.0121315	0.174142	-2.98894
Cela1	0.924804	3.54038	2.88451	0.0121523	0.174199	-2.99055
Zfp131	-0.385073	3.68314	-2.88414	0.0121613	0.174199	-2.99124
Slc18b1	0.492444	1.48169	2.88403	0.0121637	0.174199	-2.99143
Sorbs2	-0.459409	5.96783	-2.88335	0.0121801	0.17427	-2.99268
Gadd45a	1.31655	1.67229	2.88269	0.0121958	0.17427	-2.99389
Dcx	-1.47796	-3.89561	-2.88264	0.012197	0.17427	-2.99399
Plg	-0.297918	11.2186	-2.88141	0.0122265	0.174396	-2.99624
Ubd	1.86464	0.588908	2.88076	0.0122421	0.174396	-2.99744
Atp1b1	-0.491461	5.49324	-2.88069	0.0122438	0.174396	-2.99757
Akr1e1	0.304954	5.3612	2.88034	0.0122523	0.174396	-2.99822
Sgsh	0.466965	2.99807	2.88025	0.0122544	0.174396	-2.99838
Id2	0.58252	7.47315	2.87902	0.0122841	0.174396	-3.00065
Camkmt	-0.851301	-0.530909	-2.879	0.0122846	0.174396	-3.00068
Per2	0.990108	3.73737	2.87818	0.0123044	0.174396	-3.00219
Specc1	-0.800298	1.42206	-2.87814	0.0123054	0.174396	-3.00227
Trp53i13	0.648501	1.05166	2.87806	0.0123073	0.174396	-3.00241
Zfp105	0.672725	-0.481973	2.87796	0.0123097	0.174396	-3.0026
Pfkl	0.375646	5.06329	2.87707	0.0123312	0.174509	-3.00423
Aadac	-0.246073	8.68896	-2.87656	0.0123436	0.174509	-3.00517
Cyp2b13	3.4562	-0.633344	2.87606	0.0123557	0.174509	-3.00608
Ccnt1	-0.379863	4.42933	-2.87563	0.0123662	0.174509	-3.00688
Iqcc	0.473368	3.11344	2.87551	0.0123691	0.174509	-3.0071
Eea1	-0.340752	4.74371	-2.87529	0.0123745	0.174509	-3.00751
Slc5a1	-0.70938	1.37909	-2.87422	0.0124005	0.174743	-3.00947
Commd3	0.386093	5.43948	2.87351	0.0124177	0.174852	-3.01077
Adtrp	0.390749	6.56571	2.87235	0.0124461	0.17508	-3.01291
Bach2os	0.901399	-0.328533	2.87184	0.0124584	0.17508	-3.01384
Matk	1.22771	-1.53267	2.87154	0.0124659	0.17508	-3.01439
Crnkl1	-0.317269	3.61137	-2.87069	0.0124865	0.17508	-3.01594
Bicdl1	0.564736	1.31962	2.87057	0.0124895	0.17508	-3.01616
Jazf1	-1.93681	-1.54562	-2.87052	0.0124908	0.17508	-3.01627
Otud4	-0.545481	4.80711	-2.86929	0.0125209	0.175115	-3.01852
Supt7l	0.412133	3.36677	2.86922	0.0125227	0.175115	-3.01865
Cox19	0.743193	4.98903	2.86911	0.0125255	0.175115	-3.01886
Col20a1	-1.03218	0.0958068	-2.86887	0.0125312	0.175115	-3.01929
Castor1	0.693181	0.480545	2.8664	0.0125923	0.175651	-3.02383
Ccdc73	0.801198	-0.118186	2.86591	0.0126044	0.175651	-3.02473
Hdhd3	0.54315	4.05027	2.86527	0.0126201	0.175651	-3.0259
Tmem50b	0.425689	2.88263	2.86516	0.0126228	0.175651	-3.0261
Ap3b1	-0.288269	5.47758	-2.86462	0.0126363	0.175651	-3.0271
Rexo2	0.380592	5.70927	2.86456	0.0126377	0.175651	-3.02721
Polr2h	0.523844	2.72931	2.86448	0.0126396	0.175651	-3.02735
Fgb	-0.467496	12.2952	-2.86398	0.0126522	0.175651	-3.02828
Hydin	-1.20352	-3.85783	-2.86386	0.0126552	0.175651	-3.0285
Zfp324	0.619145	2.53543	2.86347	0.0126648	0.175652	-3.02921
Setdb2	-0.437981	3.62727	-2.86295	0.0126777	0.175698	-3.03016
H2aw	0.607411	1.90053	2.86234	0.0126928	0.175776	-3.03128
Ggct	0.473849	2.62309	2.86142	0.0127159	0.175964	-3.03297
Rbm41	-0.57009	0.802517	-2.86097	0.012727	0.175986	-3.03379
Pcnp	0.285402	5.45627	2.86042	0.0127408	0.176033	-3.0348
Tmem175	0.75964	3.51343	2.86007	0.0127495	0.176033	-3.03544
Mpv17l	-0.759586	3.25017	-2.85924	0.0127703	0.176039	-3.03697
Vps13b	-0.305823	5.15171	-2.85876	0.0127824	0.176039	-3.03785
B3galt6	0.564392	1.13801	2.85818	0.0127971	0.176039	-3.03892
Fcor	0.995701	-0.430264	2.85763	0.0128109	0.176039	-3.03993
Usp53	-0.316198	2.44346	-2.85741	0.0128165	0.176039	-3.04034
Uty	-0.398102	3.0246	-2.85726	0.0128202	0.176039	-3.04061
Itga2b	-0.488098	1.51962	-2.85715	0.0128229	0.176039	-3.04081
LOC115489055	-0.932526	-3.87055	-2.85682	0.0128312	0.176039	-3.04142
4931406P16Rik	-0.563251	3.75659	-2.85664	0.0128358	0.176039	-3.04175
Aen	0.439702	4.08572	2.85576	0.0128579	0.176136	-3.04336
Sgk2	-0.373582	6.43013	-2.85537	0.0128677	0.176136	-3.04408
Ap1g2	-0.357998	3.34537	-2.85522	0.0128714	0.176136	-3.04435
Rmnd5b	0.375585	3.77641	2.85448	0.0128903	0.176158	-3.04572
Znrf3	-0.556482	3.37056	-2.85436	0.0128934	0.176158	-3.04594
Erf	-0.523312	4.58397	-2.85396	0.0129033	0.176158	-3.04666
Reck	-0.489712	1.83405	-2.85365	0.0129112	0.176158	-3.04723
Hhipl1	1.24324	-0.33745	2.85123	0.0129727	0.176836	-3.05167
Itgb3	-0.844039	2.01734	-2.85094	0.0129801	0.176836	-3.05221
Nans	0.485173	3.68877	2.84821	0.0130496	0.177581	-3.0572
Nom1	-0.254882	4.54251	-2.84804	0.013054	0.177581	-3.05752
Oga	-0.319293	5.72631	-2.84617	0.0131019	0.178102	-3.06094
Zfp947	0.509024	0.0682723	2.8443	0.0131502	0.178612	-3.06438
Clrn3	-1.59921	-1.68667	-2.84396	0.0131589	0.178612	-3.06499
Usp45	-0.375141	3.51831	-2.84322	0.0131781	0.178633	-3.06636
Sds	-0.782124	6.69748	-2.84316	0.0131797	0.178633	-3.06647
Baz1a	-0.467328	3.42692	-2.84128	0.0132283	0.17916	-3.06992
9530082P21Rik	0.589119	2.7473	2.84083	0.0132399	0.179186	-3.07073
Lrrc23	-0.601791	-4.26289	-2.83939	0.0132775	0.179562	-3.07338
Serpina1b	-0.285108	13.0549	-2.83854	0.0132995	0.179728	-3.07493
Cxcl14	1.48145	0.41601	2.83706	0.0133382	0.180119	-3.07765
Zfp354b	0.417342	1.36079	2.83616	0.0133617	0.180305	-3.07929
Rnf135	0.451424	3.44206	2.83424	0.0134121	0.180853	-3.08281
Fbxl19	0.488278	2.69478	2.8333	0.0134369	0.180896	-3.08454
Uap1l1	0.935881	2.87605	2.83303	0.0134441	0.180896	-3.08504
2021-03-07	-0.961677	3.2287	-2.833	0.0134447	0.180896	-3.08508
Acad12	0.664262	3.73865	2.83161	0.0134816	0.18126	-3.08764
Ifit1bl1	-0.859165	-0.294454	-2.82931	0.0135425	0.181841	-3.09185
Rap2b	0.690118	1.48417	2.82923	0.0135445	0.181841	-3.09199
Homer2	-0.377909	4.24232	-2.82836	0.0135677	0.181911	-3.09359
Ddx3y	-0.372461	5.15345	-2.82829	0.0135695	0.181911	-3.09371
Olfr701	1.69055	-3.40255	2.82791	0.0135796	0.181916	-3.09441
Mansc4	0.936079	-1.02659	2.82697	0.0136046	0.181985	-3.09612
Akap11	-0.516512	4.34543	-2.82612	0.0136274	0.181985	-3.09768
Rrn3	-0.379408	3.91937	-2.82605	0.0136291	0.181985	-3.0978
Timm17a	-0.309824	4.34666	-2.8258	0.0136359	0.181985	-3.09827
Tifa	0.567224	3.78649	2.82575	0.0136372	0.181985	-3.09836
Tle1	-0.431228	5.06269	-2.8255	0.013644	0.181985	-3.09882
Ddhd2	-0.488273	4.57677	-2.82455	0.0136694	0.182179	-3.10056
Usp15	-0.314425	5.08665	-2.82422	0.0136782	0.182179	-3.10116
Crocc	0.393014	1.07374	2.82279	0.0137165	0.182479	-3.10377
Sae1	0.293692	4.04892	2.82264	0.0137205	0.182479	-3.10405
Cdc42bpa	-0.301256	4.77475	-2.82151	0.0137509	0.182752	-3.10611
Brwd1	-0.453169	4.83879	-2.82058	0.0137761	0.182937	-3.10782
Klhl42	0.288537	3.69296	2.81961	0.0138024	0.182937	-3.1096
Cacfd1	0.27963	4.75955	2.81949	0.0138056	0.182937	-3.10982
Enpp4	-0.40486	3.46514	-2.81942	0.0138073	0.182937	-3.10993
Nox4	0.449286	5.5952	2.8191	0.013816	0.182937	-3.11053
Btg2	1.18597	4.07999	2.8188	0.0138243	0.182937	-3.11108
Irak4	0.402327	3.34392	2.81756	0.0138579	0.18325	-3.11335
Ttl	0.373805	3.10292	2.81679	0.0138786	0.183332	-3.11474
Entpd6	0.350961	2.91697	2.8166	0.013884	0.183332	-3.11511
Myo1e	-0.360267	5.92433	-2.81529	0.0139196	0.183672	-3.1175
Med22	0.276996	4.7584	2.81234	0.0140002	0.184539	-3.12289
Smad2	-0.318064	4.03349	-2.81215	0.0140054	0.184539	-3.12323
Pkn2	-0.263924	4.94306	-2.81148	0.0140238	0.184624	-3.12446
Triap1	0.382815	3.70028	2.81119	0.0140319	0.184624	-3.125
Ccdc138	0.572972	1.61967	2.81064	0.0140469	0.184691	-3.126
Tpra1	0.351758	3.34041	2.80962	0.014075	0.184733	-3.12786
AA467197	0.997047	-3.93734	2.80957	0.0140764	0.184733	-3.12796
Pparg	0.795708	3.74574	2.80916	0.0140877	0.184733	-3.1287
Zfp715	-0.420965	3.6733	-2.80879	0.0140979	0.184733	-3.12938
Glt8d1	0.36996	3.15325	2.80844	0.0141074	0.184733	-3.13001
Rbbp8	-0.446647	2.64379	-2.80834	0.0141102	0.184733	-3.13019
Srd5a2	0.457653	0.688438	2.80794	0.0141214	0.184733	-3.13093
Syt1	-0.523919	3.79328	-2.80762	0.0141302	0.184733	-3.13151
Dtx1	-0.884484	-0.281378	-2.80701	0.0141471	0.184823	-3.13263
Txnip	-1.47017	7.005	-2.80576	0.0141817	0.185144	-3.13491
Zfp654	-0.355432	3.45612	-2.80519	0.0141976	0.185221	-3.13596
Obscn	-1.72469	-3.42118	-2.80343	0.0142466	0.185729	-3.13917
Gsta2	-1.06094	4.42607	-2.80289	0.0142617	0.185795	-3.14016
Hadh	0.421918	8.40799	2.80093	0.0143165	0.18601	-3.14374
Plxnb1	-0.530511	5.56498	-2.80058	0.0143263	0.18601	-3.14438
Mamdc2	0.658772	1.74448	2.80047	0.0143294	0.18601	-3.14458
Pcdh7	1.09849	-0.894006	2.80025	0.0143357	0.18601	-3.14499
Gabre	1.38488	-2.30135	2.79962	0.0143533	0.18601	-3.14613
Ndrg1	-0.592523	5.15296	-2.79962	0.0143533	0.18601	-3.14613
Phf24	-1.09034	-0.599197	-2.79919	0.0143653	0.18601	-3.14691
Slc6a12	-0.332867	6.08782	-2.79907	0.0143688	0.18601	-3.14714
Misp3	1.37293	-3.79575	2.79894	0.0143723	0.18601	-3.14737
Nt5dc2	0.35149	3.06132	2.79871	0.014379	0.18601	-3.1478
Bmi1	0.296463	4.06534	2.79827	0.0143914	0.18604	-3.1486
Cxcl10	1.08647	2.4778	2.79753	0.0144121	0.18606	-3.14995
Slc16a6	0.60109	3.32759	2.7975	0.0144131	0.18606	-3.15001
Rictor	-0.498215	3.92976	-2.79614	0.0144514	0.186424	-3.15249
Gpr34	1.54154	-3.29072	2.79542	0.0144719	0.186492	-3.15381
Dyrk1a	-0.338718	4.59367	-2.79524	0.0144769	0.186492	-3.15413
Zfand1	0.310802	4.18079	2.79439	0.014501	0.186673	-3.15569
Nemp2	0.642316	-0.490059	2.79329	0.0145323	0.186945	-3.1577
Syt5	-0.784661	-4.0412	-2.79213	0.0145651	0.187237	-3.1598
Fbxo40	1.77686	-0.839187	2.79124	0.0145906	0.187311	-3.16143
Macf1	-0.309551	6.33051	-2.79122	0.0145912	0.187311	-3.16147
Emc2	-0.240418	4.47328	-2.79033	0.0146168	0.187426	-3.1631
Gli3	1.49048	-1.97472	2.7897	0.0146345	0.187426	-3.16423
Kdm1a	-0.306813	3.72049	-2.78956	0.0146386	0.187426	-3.1645
Fam120a	-0.248474	7.21636	-2.78949	0.0146408	0.187426	-3.16463
Nipal3	0.341673	3.49301	2.7888	0.0146605	0.187426	-3.16589
Tnpo2	-0.355118	5.19183	-2.78878	0.014661	0.187426	-3.16592
Ppil6	-0.761074	-1.90809	-2.78769	0.0146923	0.187695	-3.16791
Ftcd	-0.380383	8.84808	-2.78641	0.0147292	0.188037	-3.17025
4933431G14Rik	-2.88339	-0.356216	-2.78544	0.0147572	0.188107	-3.17202
Prps2	0.52033	3.46442	2.78526	0.0147624	0.188107	-3.17235
Glce	-0.430154	4.40631	-2.78516	0.0147653	0.188107	-3.17253
Ppfia1	-0.28423	4.71735	-2.78406	0.0147971	0.18825	-3.17454
Stam2	-0.313779	3.95497	-2.78369	0.0148078	0.18825	-3.17521
Cacna1g	1.71117	-3.27755	2.78349	0.0148136	0.18825	-3.17557
Gnat1	-0.743649	3.33933	-2.78321	0.0148217	0.18825	-3.17608
Cables1	-1.08557	0.712699	-2.78301	0.0148275	0.18825	-3.17645
Ralgps1	-0.554508	2.49005	-2.78188	0.0148604	0.188538	-3.17851
Mir6939	0.882329	-4.0414	2.78113	0.0148822	0.188685	-3.17988
Aqp8	0.960195	5.92524	2.77933	0.0149346	0.189219	-3.18316
Klhl11	-1.20901	-1.02019	-2.7785	0.0149589	0.189272	-3.18468
Usf3	-0.420017	5.54687	-2.77848	0.0149594	0.189272	-3.18471
AI506816	-0.955593	1.89704	-2.77814	0.0149695	0.189272	-3.18533
Mllt3	0.590253	1.42343	2.77604	0.0150309	0.189918	-3.18915
Fjx1	1.46098	-3.16472	2.77385	0.0150955	0.190103	-3.19314
Sh3pxd2a	0.454063	5.74235	2.77371	0.0150997	0.190103	-3.19341
Fbxw4	0.383556	3.48548	2.77363	0.0151019	0.190103	-3.19354
Rtp3	0.434525	6.36569	2.77359	0.0151031	0.190103	-3.19362
A930033H14Rik	-1.31265	1.14554	-2.77358	0.0151035	0.190103	-3.19364
Nat8f7	1.59883	-2.13733	2.77345	0.0151073	0.190103	-3.19388
Nfya	0.329729	3.69684	2.77298	0.0151212	0.190148	-3.19473
Snora74a	-0.343616	-4.28993	-2.77159	0.0151622	0.190534	-3.19726
Myo1a	-1.56652	0.731582	-2.77116	0.0151751	0.190566	-3.19805
Mdh1	-0.431142	8.61471	-2.76995	0.0152111	0.190888	-3.20026
Snrpb	-0.261915	4.87889	-2.76729	0.0152904	0.191628	-3.2051
Pum1	-0.436188	5.29005	-2.76704	0.0152978	0.191628	-3.20555
Aspg	-0.444743	7.48262	-2.76693	0.0153012	0.191628	-3.20576
Dennd4b	0.379781	3.1873	2.76649	0.0153141	0.19166	-3.20654
Arhgap39	0.528822	2.13244	2.76478	0.0153655	0.192172	-3.20966
Rara	0.53374	4.28349	2.7637	0.015398	0.192449	-3.21163
Smoc2	0.648308	2.58345	2.76306	0.0154173	0.19256	-3.2128
Zfp987	1.94989	-3.19468	2.76239	0.0154376	0.192683	-3.21403
Eif4a1	-0.272822	7.54807	-2.7609	0.0154825	0.193008	-3.21673
Nefh	-1.33262	-1.97003	-2.76059	0.0154918	0.193008	-3.21729
Btnl2	-1.26534	-2.22951	-2.76049	0.015495	0.193008	-3.21748
F830016B08Rik	-0.833412	1.81611	-2.75969	0.0155192	0.193074	-3.21894
9130024F11Rik	0.891422	-3.83637	2.75962	0.0155212	0.193074	-3.21905
Plxdc2	1.29238	-0.322796	2.75909	0.0155373	0.193144	-3.22002
Scmh1	-0.496541	3.03828	-2.75867	0.01555	0.193172	-3.22078
C3	-0.465282	12.8736	-2.75712	0.0155974	0.19363	-3.22362
Bcar3	0.32763	5.76382	2.75614	0.0156273	0.193801	-3.2254
Tsen54	0.605111	1.91007	2.75598	0.0156322	0.193801	-3.22569
Nthl1	0.41626	2.48692	2.75497	0.0156629	0.193984	-3.22752
Sprtn	-0.325478	3.6714	-2.75473	0.0156702	0.193984	-3.22795
Iffo1	-0.482051	2.55411	-2.75442	0.0156797	0.193984	-3.22852
LOC108167416	-1.35661	-3.32373	-2.75412	0.0156889	0.193984	-3.22907
Ncam2	0.803397	0.526343	2.75219	0.0157481	0.194586	-3.23257
Minpp1	-0.297979	4.91187	-2.75098	0.0157853	0.194914	-3.23477
Sos2	-0.330809	3.57655	-2.74926	0.0158387	0.195443	-3.23791
Peg10	1.26835	0.387337	2.7484	0.0158651	0.195479	-3.23946
Naip6	-0.860596	0.944994	-2.74826	0.0158695	0.195479	-3.23972
2310034O05Rik	-1.98328	-3.59065	-2.74813	0.0158734	0.195479	-3.23995
Hsd17b11	0.335807	7.87823	2.74741	0.0158959	0.195626	-3.24127
Ctdspl2	-0.52512	2.24114	-2.74702	0.015908	0.195644	-3.24197
Ythdc1	-0.417121	4.53685	-2.74554	0.0159542	0.195946	-3.24467
Tenm2	-0.836979	-4.13971	-2.7449	0.0159739	0.195946	-3.24582
Dmxl2	-0.463465	4.63339	-2.7448	0.015977	0.195946	-3.246
Pim3	-0.638149	5.91034	-2.74465	0.0159819	0.195946	-3.24628
Dazap1	-0.31678	4.89159	-2.74453	0.0159856	0.195946	-3.2465
Kdm1b	0.328649	4.68793	2.74283	0.0160387	0.196195	-3.24959
Lbh	0.465135	3.39665	2.74278	0.0160403	0.196195	-3.24968
Lims2	0.409285	6.15092	2.74249	0.0160492	0.196195	-3.2502
Npc1l1	-1.56994	-0.390008	-2.74231	0.016055	0.196195	-3.25053
Gas6	0.643279	5.24386	2.74218	0.0160591	0.196195	-3.25077
Arhgap18	-0.679434	3.69423	-2.74129	0.016087	0.196406	-3.25238
Dglucy	0.658699	5.20209	2.73971	0.0161368	0.196649	-3.25527
Insig1	-0.683872	6.94051	-2.73946	0.0161445	0.196649	-3.25571
Usp34	-0.250858	5.20322	-2.73933	0.0161486	0.196649	-3.25594
Vmn1r4	1.55616	-1.30964	2.7393	0.0161495	0.196649	-3.256
Ncmap	1.93078	-0.0533639	2.73844	0.0161767	0.19685	-3.25756
Cyp7b1	1.56466	6.93022	2.73731	0.0162125	0.197156	-3.25962
Lrrc8b	-1.19702	-0.028571	-2.7362	0.0162476	0.197452	-3.26163
Tmem134	0.66918	5.56357	2.73559	0.016267	0.197558	-3.26274
Mfhas1	0.449563	4.54167	2.73518	0.0162799	0.197585	-3.26348
Bloc1s5	0.330796	4.64852	2.73474	0.0162942	0.197628	-3.26429
Dhx9	-0.39582	5.9168	-2.73355	0.016332	0.19781	-3.26645
Vdac2	-0.214415	5.59053	-2.73325	0.0163416	0.19781	-3.267
Ano10	-0.522974	3.42449	-2.73319	0.0163434	0.19781	-3.2671
Smcp	1.37676	-3.84649	2.73292	0.016352	0.19781	-3.26759
1700003E24Rik	0.523887	-4.28885	2.73187	0.0163854	0.197968	-3.26949
Lpin2	-0.898262	7.95201	-2.73148	0.0163981	0.197968	-3.27021
Sf3b3	-0.257985	5.39104	-2.73141	0.0164003	0.197968	-3.27033
Tbc1d15	-0.385066	5.41318	-2.73117	0.016408	0.197968	-3.27077
Cryab	0.46529	1.19518	2.73064	0.0164249	0.198043	-3.27173
Rhbdf2	0.364287	3.46373	2.72988	0.0164492	0.198207	-3.2731
Nup133	-0.309987	3.31082	-2.72859	0.0164906	0.198576	-3.27544
Senp8	0.530602	1.05424	2.72804	0.0165086	0.198663	-3.27645
Clptm1	-0.508194	6.25333	-2.72745	0.0165273	0.198759	-3.27751
Cyp20a1	-0.395144	2.79662	-2.727	0.0165419	0.198804	-3.27833
2810013P06Rik	0.516207	2.80042	2.7258	0.0165807	0.199109	-3.2805
Rnf183	-0.692044	-4.1563	-2.72526	0.0165983	0.199109	-3.28149
Syp	0.763394	-0.140672	2.72522	0.0165996	0.199109	-3.28156
Defa38	-1.10651	0.556761	-2.72475	0.0166147	0.19916	-3.28241
F2rl2	-0.832638	-2.19444	-2.72367	0.0166497	0.199343	-3.28437
Polr3gl	0.504934	3.17241	2.72344	0.0166573	0.199343	-3.28479
Plekhm3	-0.637895	1.21264	-2.72305	0.01667	0.199343	-3.2855
Mfsd4b3-ps	0.347414	3.50676	2.72295	0.0166731	0.199343	-3.28567
Loxl1	1.01798	0.804841	2.72222	0.0166971	0.1995	-3.28701
Klhl33	1.32756	-3.58029	2.72145	0.016722	0.199669	-3.2884
Micu3	-1.21365	-0.181271	-2.72096	0.0167379	0.199729	-3.28928
Papss1	0.351681	3.21879	2.72052	0.0167523	0.199772	-3.29008
Celf1	-0.310651	6.29425	-2.71991	0.0167724	0.199782	-3.29119
Cblb	-0.672898	3.29778	-2.71983	0.0167748	0.199782	-3.29133
Slc6a6	-0.493472	6.80834	-2.71892	0.0168046	0.200009	-3.29298
Jcad	-0.563068	2.93487	-2.71732	0.0168571	0.200458	-3.29588
Ccdc96	1.12023	-2.57152	2.71711	0.0168641	0.200458	-3.29626
Lcor	-0.711052	2.11606	-2.71629	0.0168912	0.200626	-3.29775
2810006K23Rik	0.37327	3.16915	2.71573	0.0169095	0.200626	-3.29876
Lman2l	0.435179	3.96359	2.71512	0.0169295	0.200626	-3.29986
Hsp90aa1	0.98152	7.28932	2.71508	0.0169311	0.200626	-3.29994
Tkfc	-0.47071	8.18297	-2.71493	0.016936	0.200626	-3.30021
Eif4e2	-0.206745	5.56034	-2.71458	0.0169475	0.200626	-3.30085
Rab3d	0.622718	3.40108	2.71437	0.0169543	0.200626	-3.30122
Smad5	-0.225579	4.82802	-2.71397	0.0169678	0.200656	-3.30196
LOC115488077	0.931545	-3.84242	2.71232	0.0170222	0.201172	-3.30494
Zfp609	-0.382731	4.57278	-2.71054	0.0170814	0.201742	-3.30816
Serpina3n	0.350489	8.92126	2.70991	0.0171025	0.201862	-3.3093
Ifitm10	-1.19889	-1.5568	-2.70892	0.0171355	0.202123	-3.3111
Eya2	-1.23209	-3.32617	-2.70759	0.0171802	0.20252	-3.31352
Slc17a3	0.405301	5.92893	2.70564	0.0172454	0.202879	-3.31704
Haus8	0.78757	1.93793	2.70558	0.0172474	0.202879	-3.31715
Ebp	-0.311187	7.34893	-2.70539	0.0172538	0.202879	-3.31749
Mbtd1	-0.563385	3.62798	-2.70537	0.0172546	0.202879	-3.31753
Dclre1a	0.526741	3.51999	2.70483	0.0172727	0.202962	-3.31851
Usp50	3.36743	-1.09024	2.70265	0.0173463	0.203698	-3.32246
Treh	0.849064	1.16439	2.70181	0.0173748	0.203902	-3.32398
Zc3h15	-0.30515	5.38128	-2.69935	0.0174581	0.204635	-3.32842
1110004F10Rik	-0.246613	5.01171	-2.69931	0.0174594	0.204635	-3.32849
Snrpa	0.414398	4.83564	2.69881	0.0174764	0.204668	-3.32939
Zc3h4	-0.279832	4.9443	-2.69848	0.0174877	0.204668	-3.32999
Limk1	0.925032	1.82986	2.69825	0.0174955	0.204668	-3.33041
Efcab9	1.15587	-3.99534	2.69754	0.0175197	0.204805	-3.33169
Slc27a1	0.875269	3.94194	2.69726	0.0175294	0.204805	-3.33221
Gtf3c4	-0.36274	4.46347	-2.69586	0.0175773	0.205236	-3.33474
Ypel2	0.455005	4.35437	2.6948	0.0176136	0.20545	-3.33665
Rnf24	-0.767572	3.10655	-2.6945	0.0176239	0.20545	-3.3372
Gm32856	-0.587783	-0.52769	-2.69435	0.0176291	0.20545	-3.33747
Mrpl49	0.261235	5.06291	2.69301	0.0176749	0.205762	-3.33988
Foxp2	-0.530316	1.824	-2.69292	0.0176782	0.205762	-3.34005
Mettl7a3	-1.15908	-3.36041	-2.69148	0.0177277	0.206208	-3.34265
Dand5	0.56312	1.93961	2.69081	0.017751	0.206224	-3.34387
LOC115487690	1.338	-3.28295	2.69051	0.0177612	0.206224	-3.3444
Eif1b	0.370358	3.7732	2.69029	0.0177689	0.206224	-3.34481
Phka2	-0.310559	4.84192	-2.69007	0.0177766	0.206224	-3.34521
Rplp0	-0.303446	8.43199	-2.68983	0.0177849	0.206224	-3.34564
4933417D19Rik	-0.818824	-0.610799	-2.68939	0.0178001	0.206271	-3.34643
Atg9a	-0.299708	5.62088	-2.68785	0.0178535	0.20676	-3.34921
Krt79	1.20903	-2.44513	2.68739	0.0178696	0.206817	-3.35005
Ppip5k2	-0.636943	4.6612	-2.687	0.0178831	0.206843	-3.35075
Xpo5	-0.26723	4.52879	-2.68667	0.0178945	0.206846	-3.35134
Bptf	-0.423107	4.86972	-2.68415	0.0179825	0.207733	-3.3559
B3gnt9	0.656752	-0.633675	2.68375	0.0179967	0.207767	-3.35663
Mif	-0.386332	6.18593	-2.68337	0.0180098	0.207788	-3.3573
Pdcd1	1.45968	-3.64035	2.68223	0.0180498	0.20812	-3.35936
Ubxn4	0.347267	6.88992	2.68143	0.018078	0.208228	-3.36081
Ints3	0.370527	4.9128	2.68132	0.0180817	0.208228	-3.361
Fam241b	1.08887	0.546707	2.67877	0.0181717	0.209056	-3.36561
Pigp	0.434297	3.65104	2.67841	0.0181845	0.209056	-3.36626
Zfp493	0.411953	0.552226	2.67829	0.0181887	0.209056	-3.36647
Dus2	0.375926	2.93919	2.678	0.018199	0.209056	-3.367
Atp5b	-0.41398	9.82102	-2.67759	0.0182136	0.209094	-3.36774
Usp40	-0.367306	5.24779	-2.67673	0.018244	0.209312	-3.36929
Tmc7	-0.874732	2.36525	-2.67536	0.0182927	0.209495	-3.37176
Vps16	-0.294903	4.58916	-2.67501	0.0183053	0.209495	-3.3724
Vps26a	0.257116	5.39467	2.67474	0.0183149	0.209495	-3.37289
Mkks	0.506118	3.56292	2.67452	0.0183226	0.209495	-3.37328
Derl3	2.83559	0.578677	2.67424	0.0183328	0.209495	-3.3738
1700123O20Rik	0.613885	4.07028	2.67422	0.0183333	0.209495	-3.37382
Urb2	-0.30766	3.24609	-2.67398	0.0183421	0.209495	-3.37426
Tut7	-0.363185	6.29102	-2.67374	0.0183507	0.209495	-3.3747
S100a4	0.954975	0.00445696	2.67326	0.0183677	0.209559	-3.37556
Ick	0.473623	4.08518	2.67231	0.0184016	0.209817	-3.37727
Tmem30a	-0.255539	7.03461	-2.66994	0.0184868	0.210658	-3.38155
Tmem97	-0.452104	5.62752	-2.66913	0.0185159	0.21081	-3.38301
Naa80	0.513195	5.84286	2.6688	0.0185277	0.21081	-3.3836
Ap4e1	-0.44357	2.32437	-2.66862	0.0185344	0.21081	-3.38394
Dexi	0.801079	3.91	2.66806	0.0185546	0.21091	-3.38495
Epha1	-0.305975	5.33047	-2.66748	0.0185753	0.211001	-3.38598
Man2c1os	0.519402	-0.190072	2.66664	0.0186056	0.211001	-3.38749
Zfp119b	-0.431512	1.45229	-2.66607	0.0186263	0.211001	-3.38852
Tm2d1	-0.386892	2.98457	-2.66599	0.0186294	0.211001	-3.38868
Setd2	-0.265334	5.22276	-2.66589	0.018633	0.211001	-3.38886
Bscl2	0.396722	5.58014	2.66563	0.0186422	0.211001	-3.38931
Fkbp15	-0.240138	5.40219	-2.66562	0.0186426	0.211001	-3.38933
Anxa4	0.279001	5.54559	2.66282	0.0187444	0.212022	-3.39438
Ccdc12	-0.340161	4.00407	-2.66205	0.0187723	0.212209	-3.39576
Gm1821	0.553339	6.45533	2.66107	0.0188083	0.212358	-3.39754
Colgalt1	0.620319	5.89328	2.66106	0.0188085	0.212358	-3.39755
Zfp760	0.51095	2.29427	2.66043	0.0188317	0.212422	-3.39869
Pip5k1a	-0.491721	3.43264	-2.6602	0.01884	0.212422	-3.3991
Malat1	-0.61522	7.24919	-2.65996	0.0188487	0.212422	-3.39953
Ccdc18	-1.50847	-2.71356	-2.65842	0.0189054	0.212809	-3.40231
ATP6	-0.808467	12.5739	-2.65803	0.0189199	0.212809	-3.40302
LOC115489817	-0.393772	-1.42043	-2.658	0.0189208	0.212809	-3.40306
Zfp980	1.08693	-0.671209	2.65777	0.0189292	0.212809	-3.40348
Col15a1	0.739354	2.30678	2.65593	0.018997	0.213189	-3.40679
Fgfr3	0.383973	4.20318	2.65541	0.0190164	0.213189	-3.40773
Get4	-0.226339	4.32031	-2.65479	0.0190391	0.213189	-3.40884
Xkr8	0.395811	2.77122	2.65464	0.019045	0.213189	-3.40913
Dnajc9	0.387715	2.27343	2.65412	0.0190642	0.213189	-3.41006
Lrmda	-1.57013	-2.07685	-2.65404	0.0190672	0.213189	-3.4102
Olfr1028	0.706179	-4.07998	2.6534	0.0190908	0.213189	-3.41135
Ficd	0.706084	3.5656	2.65292	0.0191086	0.213189	-3.41221
Fam219a	0.293166	3.18459	2.65278	0.0191138	0.213189	-3.41247
Ugt2a3	-0.308552	7.77252	-2.65261	0.0191201	0.213189	-3.41277
Luc7l2	-0.402372	6.82695	-2.6525	0.019124	0.213189	-3.41296
Dsg1c	0.804076	3.03647	2.65235	0.0191297	0.213189	-3.41324
Mtor	-0.290031	5.99602	-2.65234	0.0191303	0.213189	-3.41327
Klhl31	2.13486	-1.64105	2.65227	0.0191326	0.213189	-3.41338
Afg3l2	-0.20573	6.35007	-2.65218	0.0191362	0.213189	-3.41355
Ptma	0.496826	7.85847	2.65181	0.0191498	0.213203	-3.41421
Ccnd1	-0.717919	5.01538	-2.6515	0.0191613	0.213203	-3.41477
Commd8	0.547336	3.45175	2.65121	0.0191721	0.213203	-3.41529
Cib3	-2.24749	1.6328	-2.65063	0.0191939	0.213317	-3.41634
Ppm1d	-0.417065	2.40941	-2.64921	0.0192469	0.213696	-3.4189
Uqcrc1	-0.233972	7.78768	-2.64909	0.0192512	0.213696	-3.4191
Cpne8	0.858885	1.94844	2.64858	0.0192705	0.213731	-3.42003
Nabp1	-0.618683	3.54406	-2.6483	0.0192808	0.213731	-3.42053
Hs1bp3	0.388343	3.79144	2.64808	0.0192891	0.213731	-3.42092
Mdp1	0.421605	3.69269	2.64776	0.0193012	0.213738	-3.42151
Plbd1	0.266878	5.6353	2.64656	0.0193463	0.214069	-3.42367
Raet1e	0.727078	2.65165	2.64634	0.0193544	0.214069	-3.42405
Smad3	0.247337	4.24556	2.6457	0.0193785	0.214207	-3.42521
Sall1	-0.630403	5.13961	-2.64514	0.0193994	0.21431	-3.42621
Mir6993	-0.833978	-2.9659	-2.64453	0.0194227	0.214439	-3.42732
Cldn4	-1.39738	-2.27303	-2.64415	0.0194369	0.214468	-3.42799
Efnb1	0.285619	4.05907	2.64328	0.0194699	0.214704	-3.42956
Trib1	0.78519	5.59026	2.64273	0.0194906	0.21475	-3.43055
Palld	0.441888	6.18601	2.64225	0.0195087	0.21475	-3.43141
Ywhah	0.342187	5.67356	2.64224	0.0195089	0.21475	-3.43142
H2bc9	0.832444	-1.04719	2.64168	0.0195304	0.214857	-3.43244
Dcaf13	-0.245326	4.28964	-2.64061	0.019571	0.215132	-3.43436
Smpd5	1.49744	-2.98202	2.64041	0.0195786	0.215132	-3.43472
Mak16	-0.334426	3.93759	-2.6394	0.019617	0.215301	-3.43653
Catsper2	0.65188	1.82932	2.63939	0.0196173	0.215301	-3.43655
2810021J22Rik	0.565175	1.53508	2.63895	0.0196341	0.215342	-3.43734
Arhgap21	-0.296591	4.81477	-2.63859	0.0196478	0.215342	-3.43799
Dynlt1b	-0.827002	1.88868	-2.63838	0.019656	0.215342	-3.43838
Fancg	0.522977	1.5882	2.63795	0.0196724	0.215393	-3.43915
Gatb	0.334248	5.31057	2.63666	0.0197217	0.215805	-3.44146
Mapre2	-0.531588	3.45077	-2.63549	0.0197665	0.216166	-3.44356
Zfp382	1.68066	-3.3824	2.63501	0.0197848	0.216239	-3.44442
Abca8a	-0.503389	6.46004	-2.63464	0.0197992	0.216268	-3.44509
Rpsa	-0.459878	8.51812	-2.63323	0.0198532	0.21673	-3.44761
Chrna1os	0.565521	0.891682	2.63233	0.019888	0.216858	-3.44924
Habp2	-0.47668	7.23509	-2.63219	0.0198934	0.216858	-3.44949
Psph	0.380069	1.79447	2.63201	0.0199002	0.216858	-3.4498
Zg16	-0.957322	1.74952	-2.63062	0.0199542	0.217318	-3.45231
Pigh	0.32607	1.87523	2.63013	0.0199733	0.217348	-3.4532
Brpf3	-0.419286	4.78317	-2.62994	0.0199805	0.217348	-3.45353
Ppfia2	-1.09874	-1.42858	-2.62919	0.0200094	0.217376	-3.45487
Ly6m	-1.3999	-1.53154	-2.62915	0.0200112	0.217376	-3.45495
Hoxc6	1.39916	-3.59606	2.62896	0.0200184	0.217376	-3.45528
Arhgef39	0.682936	-0.531104	2.62684	0.0201009	0.21814	-3.45909
Snora34	-0.890117	-1.49826	-2.62655	0.0201123	0.21814	-3.45961
Ppp6r3	-0.229352	5.93863	-2.62581	0.0201412	0.218325	-3.46094
Cyp8b1	0.819544	8.6247	2.62506	0.0201704	0.218413	-3.46228
Atf3	1.37364	1.05914	2.625	0.0201731	0.218413	-3.4624
Erlec1	-0.2541	4.60111	-2.62373	0.0202225	0.21882	-3.46467
Dhrs13	0.356314	1.75699	2.62277	0.0202601	0.219039	-3.46639
Vmn2r57	0.693303	-0.017701	2.62261	0.0202665	0.219039	-3.46668
Slc15a1	-1.43711	-1.78319	-2.62213	0.0202855	0.219117	-3.46755
Anp32a	0.370112	7.08653	2.62094	0.0203322	0.219175	-3.46967
Mup15	4.92025	8.07459	2.62074	0.0203404	0.219175	-3.47005
Soat2	-0.276812	5.68974	-2.62049	0.0203501	0.219175	-3.47049
S100a11	1.0145	3.0788	2.62021	0.0203611	0.219175	-3.47099
Mgmt	0.489498	4.09301	2.61971	0.0203809	0.219175	-3.47189
Mroh1	0.357037	4.99649	2.61966	0.0203829	0.219175	-3.47198
Skp1a	0.236867	7.32412	2.61928	0.0203977	0.219175	-3.47265
Tnfrsf1a	0.225201	6.04051	2.61897	0.0204102	0.219175	-3.47322
Obp2a	1.68051	0.368013	2.61853	0.0204277	0.219175	-3.47401
Upb1	-0.242423	8.35671	-2.61819	0.0204411	0.219175	-3.47461
Unc13b	0.958754	3.31432	2.61809	0.0204452	0.219175	-3.4748
Strn3	-0.394844	4.18684	-2.61777	0.0204578	0.219175	-3.47537
Rhoq	0.393215	3.56196	2.61769	0.0204609	0.219175	-3.47551
Guca2b	-1.06901	-0.0320419	-2.61764	0.0204628	0.219175	-3.47559
Poc1b	0.306885	2.73577	2.61749	0.020469	0.219175	-3.47587
Polq	-1.73915	-3.41948	-2.61536	0.0205535	0.219952	-3.47968
Slc35e3	0.80618	4.15433	2.61358	0.0206246	0.220552	-3.48288
Slc19a1	-0.35747	3.15472	-2.61336	0.0206335	0.220552	-3.48327
Mbd5	-0.372813	2.97698	-2.6129	0.0206518	0.220559	-3.4841
Gpm6b	-0.6819	-0.951544	-2.61274	0.020658	0.220559	-3.48437
Nipbl	-0.252203	4.86392	-2.61192	0.0206909	0.220735	-3.48584
Insyn1	1.74459	-3.68415	2.61174	0.0206984	0.220735	-3.48618
Ints2	0.419934	2.29927	2.61141	0.0207113	0.220745	-3.48676
Pkp2	-0.283724	5.10245	-2.61109	0.0207245	0.220759	-3.48735
Exog	0.793054	0.73943	2.61059	0.0207444	0.220843	-3.48823
Acat1	0.308122	9.14617	2.60981	0.0207758	0.221049	-3.48963
Tcf20	-0.248678	4.80659	-2.60916	0.0208018	0.221121	-3.49079
Cyp2u1	1.12473	4.62935	2.60905	0.0208064	0.221121	-3.49099
Pom121	-0.395654	4.18573	-2.60774	0.0208594	0.221556	-3.49334
Cfhr2	-0.3674	8.00295	-2.60741	0.0208727	0.22157	-3.49393
G6pdx	-0.466207	2.69572	-2.60684	0.0208958	0.221688	-3.49495
Alg10b	-0.772142	4.84161	-2.60607	0.0209267	0.221888	-3.49632
Bbs7	-0.493714	1.80572	-2.60508	0.0209672	0.222089	-3.4981
Gpr68	0.745211	-0.774745	2.60501	0.0209697	0.222089	-3.49822
Mtmr2	-0.253253	4.21955	-2.60372	0.0210225	0.22252	-3.50054
Cldn20	1.42206	-3.0281	2.60291	0.0210555	0.222727	-3.50199
Pgk1	-0.279841	7.88278	-2.6021	0.0210886	0.222727	-3.50344
Dap	0.312079	7.68778	2.6018	0.0211009	0.222727	-3.50398
Fam81a	-1.14681	0.580764	-2.6018	0.0211009	0.222727	-3.50398
Trrap	-0.274666	5.54405	-2.60161	0.0211084	0.222727	-3.50431
Smarcd2	0.31089	5.46401	2.60146	0.0211144	0.222727	-3.50457
Nrbf2	0.371585	4.54564	2.60083	0.0211402	0.222872	-3.5057
Rps2	-0.422631	8.05637	-2.59916	0.0212088	0.223316	-3.50869
Chst11	0.930316	-0.973437	2.59911	0.0212111	0.223316	-3.50879
Eef1b2	-0.331574	6.80241	-2.59874	0.0212262	0.223316	-3.50945
Lyrm7	0.528686	0.833278	2.59815	0.0212504	0.223316	-3.5105
Zfp454	0.457325	0.510021	2.59807	0.0212538	0.223316	-3.51065
Ift122	0.409977	2.18721	2.59804	0.0212549	0.223316	-3.5107
Gemin7	0.732695	3.38028	2.59774	0.0212673	0.223318	-3.51123
Cobl	-0.482499	4.22197	-2.59658	0.0213151	0.223694	-3.51331
Eed	-0.226143	3.76191	-2.59579	0.0213477	0.223908	-3.51472
Rorc	0.65243	5.53004	2.59527	0.0213694	0.224009	-3.51566
1810041H14Rik	1.3722	-2.27408	2.59489	0.021385	0.224045	-3.51634
Cnmd	1.20037	0.882118	2.59443	0.021404	0.224045	-3.51715
Gata3	-1.46446	-2.22403	-2.59417	0.0214148	0.224045	-3.51762
Slc39a5	0.915448	0.582144	2.59382	0.0214293	0.224045	-3.51825
Zbtb21	0.609703	2.91234	2.59372	0.0214336	0.224045	-3.51843
Pth1r	-0.344719	3.19383	-2.59239	0.0214889	0.224386	-3.52081
Slc25a46	-0.288594	5.31037	-2.59219	0.0214972	0.224386	-3.52117
Dkk4	1.75784	-3.48628	2.59206	0.0215026	0.224386	-3.5214
4933438K21Rik	0.929325	-4.07125	2.59085	0.0215529	0.224784	-3.52356
Fam135a	-0.445084	4.17406	-2.5895	0.0216092	0.225244	-3.52597
Mir684-2	0.628971	-4.20904	2.58914	0.0216243	0.225273	-3.52661
Lonrf3	0.533442	0.29302	2.58832	0.0216588	0.225506	-3.52808
Bco1	-0.474214	2.65034	-2.58763	0.0216877	0.225679	-3.52931
Zfp87	-0.317132	2.22115	-2.58686	0.0217201	0.225792	-3.53069
Utp14a	-0.285994	4.11587	-2.58679	0.021723	0.225792	-3.53081
Tmem190	0.961922	-2.66657	2.58546	0.0217786	0.226243	-3.53318
Zdhhc1	0.440071	1.3433	2.58261	0.021899	0.227366	-3.53826
Zfp169	-0.776091	1.20805	-2.58174	0.0219361	0.227622	-3.53983
A3galt2	1.43175	-3.91101	2.58028	0.0219981	0.228137	-3.54243
Mup11	1.21618	10.1382	2.57801	0.0220951	0.229006	-3.54649
Boll	-1.01467	-4.12526	-2.57774	0.0221066	0.229006	-3.54697
Abca8b	-0.382126	6.09631	-2.57715	0.0221316	0.229046	-3.54801
Car14	-0.649867	5.76389	-2.57707	0.0221354	0.229046	-3.54817
Otulin	0.291654	5.16124	2.57612	0.0221757	0.229336	-3.54985
Ceacam2	0.918652	3.61686	2.57542	0.022206	0.22952	-3.55111
LOC115489001	-1.0234	-2.78037	-2.57458	0.022242	0.229749	-3.5526
Creb3l1	0.904396	0.512348	2.57432	0.0222531	0.229749	-3.55306
Foxs1	1.13285	-1.44443	2.5736	0.022284	0.22994	-3.55434
Tmem220	0.360735	4.11824	2.57256	0.0223289	0.230137	-3.5562
Ermap	1.46899	-2.82839	2.57249	0.0223321	0.230137	-3.55633
Lonrf1	0.507165	1.66347	2.57199	0.0223538	0.230137	-3.55723
Chd2	-0.847324	4.92417	-2.57186	0.0223592	0.230137	-3.55745
Guca2a	-1.98507	-1.28851	-2.57172	0.0223654	0.230137	-3.55771
Bet1l	0.449121	4.40199	2.57135	0.0223815	0.230149	-3.55837
Msrb1	0.355513	8.5096	2.57094	0.0223992	0.230149	-3.5591
St3gal3	0.378639	5.94456	2.57083	0.022404	0.230149	-3.5593
Oaz3	0.764265	-1.03647	2.5699	0.0224439	0.230342	-3.56094
E330009J07Rik	-0.37695	3.45412	-2.56982	0.0224478	0.230342	-3.5611
Spty2d1	-0.354697	4.01325	-2.56881	0.0224914	0.230662	-3.56289
Cars2	0.335655	3.84998	2.56814	0.0225206	0.230833	-3.56409
Mir8115	0.254995	-4.13236	2.56754	0.0225467	0.230894	-3.56515
Garem1	-0.57972	4.3619	-2.56743	0.0225515	0.230894	-3.56535
Pnrc1	0.45453	6.21408	2.56655	0.02259	0.231159	-3.56692
Rtn4ip1	0.37958	4.66349	2.56613	0.0226084	0.231219	-3.56767
Braf	-0.253075	4.31887	-2.56526	0.0226462	0.231478	-3.56921
Arntl	0.513548	3.91477	2.56433	0.0226871	0.231767	-3.57088
Zmiz2	0.264068	5.2656	2.56388	0.0227068	0.231841	-3.57168
Slc47a2	2.04235	-2.98692	2.56317	0.0227378	0.231958	-3.57294
LOC115487536	-0.985589	-3.72224	-2.56298	0.0227462	0.231958	-3.57328
Smarcal1	0.254581	3.62613	2.56231	0.0227758	0.231958	-3.57448
Asic3	-1.55356	-2.81642	-2.56225	0.0227784	0.231958	-3.57458
Zfp229	0.300109	2.21388	2.56219	0.0227812	0.231958	-3.57469
Slc13a2os	-1.64248	-2.668	-2.56176	0.0227999	0.232021	-3.57545
Trim12c	0.499793	3.01977	2.56088	0.0228387	0.232288	-3.57702
Dhrs3	0.485844	6.85728	2.56041	0.0228596	0.232373	-3.57786
Heca	-0.307811	4.94367	-2.55929	0.0229088	0.232651	-3.57984
Mas1	1.62841	-2.30811	2.55901	0.0229214	0.232651	-3.58035
Necab1	0.289252	5.51665	2.55854	0.0229421	0.232651	-3.58118
Smarca2	0.280741	6.33995	2.55836	0.0229499	0.232651	-3.5815
Rps5	-0.402032	7.33718	-2.55782	0.022974	0.232651	-3.58246
Slk	-0.292249	4.96199	-2.5578	0.0229751	0.232651	-3.58251
Mypn	1.41682	-3.25124	2.55779	0.0229752	0.232651	-3.58251
Med12	-0.214215	4.90218	-2.5572	0.0230014	0.232789	-3.58356
Wdr18	0.311924	5.80743	2.55688	0.0230158	0.232806	-3.58414
Dhx33	-0.277615	4.57754	-2.55602	0.0230541	0.232977	-3.58567
Ten1	0.69186	1.66123	2.55583	0.0230624	0.232977	-3.586
Trim65	0.644529	3.28652	2.55551	0.0230767	0.232977	-3.58657
Rock1	-0.240566	4.35784	-2.55528	0.0230871	0.232977	-3.58699
Gnao1	1.00248	-1.39067	2.55502	0.0230984	0.232977	-3.58744
Sec22b	0.288223	5.06666	2.5548	0.0231083	0.232977	-3.58784
Trip13	-0.730963	-0.45368	-2.55295	0.0231911	0.233684	-3.59113
Srcin1	0.598861	-0.0424643	2.5516	0.0232518	0.234089	-3.59354
Pir	-0.393295	3.88467	-2.55149	0.0232567	0.234089	-3.59373
Mpped2	1.5715	-2.30527	2.55065	0.0232941	0.234338	-3.59521
Nlrc5	-0.34555	4.90073	-2.5496	0.0233416	0.234529	-3.59709
Fads3	-0.737761	2.89236	-2.54957	0.0233428	0.234529	-3.59714
Cap1	-0.88297	6.00178	-2.54886	0.0233748	0.234529	-3.5984
Tcerg1	-0.416523	3.71992	-2.54884	0.0233759	0.234529	-3.59844
Zfp619	-0.666024	0.471912	-2.54882	0.0233767	0.234529	-3.59847
Slc16a11	0.697404	2.3178	2.54838	0.0233964	0.2346	-3.59925
C1qtnf3	1.43222	-1.26926	2.54685	0.023466	0.235001	-3.60198
Eprs	-0.241994	6.69893	-2.54668	0.0234735	0.235001	-3.60228
Exoc2	-0.277776	3.39029	-2.54665	0.0234746	0.235001	-3.60232
1600014C10Rik	0.892036	7.35725	2.54566	0.0235197	0.235192	-3.60409
Ager	-1.42705	-1.5242	-2.5456	0.0235225	0.235192	-3.6042
Katnal1	0.492729	2.61913	2.54528	0.0235367	0.235192	-3.60476
Chrna9	-1.69993	-3.23429	-2.54511	0.0235447	0.235192	-3.60507
Zfyve1	0.299434	6.17405	2.54293	0.0236441	0.236057	-3.60895
Trpm7	-0.252109	5.13555	-2.54256	0.0236607	0.236095	-3.60959
Mpp5	-0.331367	3.53216	-2.54205	0.0236841	0.236201	-3.61051
Urad	-0.530262	4.11022	-2.54157	0.0237061	0.236293	-3.61136
Kcmf1	-0.241287	5.71444	-2.53996	0.0237795	0.236777	-3.61421
Ltn1	-0.281984	4.442	-2.53995	0.0237803	0.236777	-3.61424
Socs7	-0.269602	3.99559	-2.53912	0.0238182	0.236903	-3.61571
Smarcd1	0.596606	3.50728	2.53911	0.0238187	0.236903	-3.61572
Lmod3	-1.64562	-2.74642	-2.53769	0.0238839	0.237425	-3.61824
Chaf1b	-0.714381	0.0887549	-2.53628	0.0239491	0.237942	-3.62075
Tmem125	0.279416	2.80432	2.536	0.0239618	0.237942	-3.62124
Psma8	1.03897	-0.95331	2.53498	0.0240091	0.238268	-3.62305
Anxa6	-0.242681	6.79518	-2.53474	0.0240204	0.238268	-3.62349
Taf5	-0.383931	1.87909	-2.53251	0.0241238	0.239165	-3.62744
Tcp10b	-1.59112	-2.69002	-2.53131	0.0241796	0.239589	-3.62956
Arsb	0.346905	5.26979	2.53006	0.0242381	0.239861	-3.63179
Mppe1	0.556577	2.63885	2.53	0.0242406	0.239861	-3.63188
Nrg4	-0.641097	2.22449	-2.52986	0.0242472	0.239861	-3.63214
E230013L22Rik	0.852615	-0.147447	2.52951	0.0242637	0.239861	-3.63276
Phldb1	0.669481	2.76604	2.52925	0.0242756	0.239861	-3.63321
Iws1	-0.376202	4.31391	-2.52906	0.0242849	0.239861	-3.63357
Ftsj3	-0.271471	5.55363	-2.52818	0.0243261	0.240139	-3.63512
Myh14	0.280784	4.40801	2.52691	0.0243858	0.240599	-3.63738
Zfp964	0.584581	0.553821	2.5258	0.0244375	0.240981	-3.63933
Prnp	0.463884	4.74962	2.52509	0.0244714	0.241074	-3.6406
Agr2	-1.3971	-1.43865	-2.52463	0.0244931	0.241074	-3.64142
Son	-0.343061	6.93797	-2.5245	0.0244989	0.241074	-3.64163
Prss8	-0.74812	1.54552	-2.5245	0.0244992	0.241074	-3.64165
Ces3b	-0.749709	8.3965	-2.52384	0.0245302	0.241184	-3.64281
Them5	-1.41657	-3.9029	-2.52371	0.0245365	0.241184	-3.64305
Taf12	0.331616	4.00883	2.523	0.0245699	0.241384	-3.6443
Zxdc	-0.279259	3.68674	-2.52164	0.0246342	0.241629	-3.6467
Gm21284	1.34314	-2.68573	2.52125	0.0246526	0.241629	-3.64739
BC106179	-0.986089	-0.743147	-2.52122	0.0246544	0.241629	-3.64745
Agfg2	-0.44788	4.70978	-2.52109	0.0246603	0.241629	-3.64767
Aph1a	-0.277242	5.43162	-2.52078	0.0246754	0.241629	-3.64824
Pdgfa	0.430893	2.09724	2.52054	0.0246868	0.241629	-3.64866
Coq2	0.292192	4.92812	2.52021	0.0247025	0.241629	-3.64925
Cyp4a14	-1.03251	11.1864	-2.52008	0.0247083	0.241629	-3.64946
Lpar6	0.441559	4.17917	2.51999	0.0247127	0.241629	-3.64963
Hsd3b7	0.388693	8.95999	2.5187	0.024774	0.241975	-3.65191
Etaa1os	0.822333	-0.955708	2.5187	0.0247742	0.241975	-3.65191
Mir99ahg	0.649241	-0.120696	2.51765	0.0248242	0.242148	-3.65376
Cxxc5	0.331901	5.17811	2.51757	0.024828	0.242148	-3.65391
D830039M14Rik	-1.03493	-3.95838	-2.51742	0.0248352	0.242148	-3.65417
Gnl2	-0.256672	5.02302	-2.51703	0.0248539	0.242148	-3.65486
Mafb	-1.00133	5.49643	-2.51696	0.0248575	0.242148	-3.655
1700101I11Rik	-0.814003	-0.776068	-2.51556	0.0249246	0.24259	-3.65748
Fyttd1	-0.73332	3.59491	-2.51546	0.0249292	0.24259	-3.65765
Zfp281	-0.578632	3.77956	-2.51477	0.0249623	0.242644	-3.65887
Zfp14	0.497695	0.657246	2.51428	0.0249858	0.242644	-3.65973
Pdia4	0.70596	7.68203	2.51427	0.0249862	0.242644	-3.65975
F9	0.203831	7.44103	2.51425	0.0249873	0.242644	-3.65979
Mmp12	3.46981	-0.751689	2.51323	0.0250363	0.242968	-3.66159
Ly6c1	-1.0616	-1.10766	-2.51301	0.025047	0.242968	-3.66198
Plcb3	0.239656	4.66664	2.51192	0.0250996	0.24335	-3.66391
Gm11437	-0.751423	1.19587	-2.51087	0.0251502	0.243713	-3.66576
Nnt	-0.866808	1.62523	-2.5103	0.0251782	0.243815	-3.66678
Acacb	-0.569934	4.92569	-2.51011	0.0251871	0.243815	-3.66711
Itga3	0.295237	2.86879	2.50977	0.0252037	0.243847	-3.66771
Porcn	-0.536782	1.88596	-2.50934	0.0252247	0.243865	-3.66848
Leprot	-0.465928	3.79519	-2.50919	0.025232	0.243865	-3.66874
1110065P20Rik	0.50602	2.42217	2.50843	0.0252688	0.244054	-3.67008
Etnk2	-0.4333	7.43878	-2.50821	0.0252797	0.244054	-3.67048
1700066M21Rik	0.33727	4.52587	2.50784	0.0252976	0.244054	-3.67113
Myo10	-0.311828	4.97623	-2.50752	0.0253134	0.244054	-3.6717
Abca6	-0.399423	6.79611	-2.50737	0.0253204	0.244054	-3.67196
Serpinf2	-0.391207	9.6203	-2.50716	0.0253309	0.244054	-3.67234
Cux1	0.259962	4.84224	2.5063	0.0253727	0.244203	-3.67385
Slmap	-0.715155	4.95884	-2.5063	0.0253728	0.244203	-3.67386
Hipk1	-0.23628	5.85777	-2.50595	0.0253895	0.244237	-3.67446
Gbp11	1.15317	3.02328	2.5053	0.0254214	0.244416	-3.67562
Prdx6	0.25164	8.3957	2.5041	0.0254802	0.244854	-3.67774
Spopl	-0.31235	3.53858	-2.5031	0.0255292	0.245198	-3.6795
Gtf2h5	0.323985	4.88054	2.50251	0.0255581	0.245243	-3.68054
Ptpre	-0.640753	1.59244	-2.50246	0.0255605	0.245243	-3.68063
Picalm	-0.363175	6.74816	-2.50129	0.0256182	0.245669	-3.6827
Plpp2	-0.382471	4.40997	-2.50008	0.0256778	0.246112	-3.68483
Tnks	-0.283077	4.63509	-2.49939	0.025712	0.246312	-3.68606
Casz1	0.513344	-0.402535	2.49881	0.0257406	0.246458	-3.68708
Mesp2	1.41639	-2.46387	2.49804	0.0257788	0.24659	-3.68844
Entpd7	0.815036	0.875918	2.49767	0.0257971	0.24659	-3.68909
Dnaja2	-0.196565	6.7331	-2.49766	0.0257975	0.24659	-3.68911
Zfp146	-0.400236	4.10409	-2.49746	0.0258078	0.24659	-3.68947
Ints6	-0.686617	4.22567	-2.49693	0.0258341	0.24666	-3.69041
Dnali1	1.38088	-3.79209	2.49652	0.0258544	0.24666	-3.69113
Nop56	-0.416067	3.87811	-2.4965	0.0258552	0.24666	-3.69116
Arl8a	-0.549866	3.39152	-2.49528	0.0259159	0.247111	-3.69331
F11	-0.656857	5.67694	-2.49475	0.0259423	0.247112	-3.69425
Gpx4	0.335197	8.00062	2.49474	0.0259428	0.247112	-3.69426
Dock7	-0.479986	3.7633	-2.4934	0.0260098	0.24761	-3.69663
Casp2	0.97621	1.4674	2.49316	0.0260218	0.24761	-3.69706
Ccdc141	-0.757022	3.87479	-2.49248	0.0260558	0.247805	-3.69825
Sema4g	-0.393653	9.0349	-2.49221	0.0260693	0.247806	-3.69873
Setd5	-0.467679	5.51628	-2.49183	0.0260885	0.247861	-3.6994
Exosc8	-0.390731	3.13122	-2.49136	0.0261121	0.247957	-3.70023
Cyp2c37	0.639331	8.8363	2.49075	0.0261428	0.248121	-3.70131
Arhgap22	1.76301	-2.16082	2.48952	0.0262046	0.248349	-3.70348
P2rx4	-0.568366	5.36982	-2.48932	0.0262143	0.248349	-3.70382
Sbno1	-0.255835	5.44821	-2.48917	0.0262223	0.248349	-3.7041
Gm5086	1.41099	-2.98269	2.489	0.0262304	0.248349	-3.70438
Prrg1	-1.00084	-0.858606	-2.48893	0.0262341	0.248349	-3.70451
Pepd	0.257304	5.19338	2.48842	0.0262598	0.248465	-3.70541
Mfsd10	0.321016	1.59121	2.48772	0.0262952	0.248552	-3.70665
Npc2	-0.323163	5.86795	-2.48724	0.0263195	0.248552	-3.7075
AI314278	1.05008	-2.42362	2.48715	0.0263238	0.248552	-3.70765
Kif1b	-0.271556	7.23177	-2.48697	0.0263331	0.248552	-3.70797
Mast3	-0.535411	4.72474	-2.48691	0.0263363	0.248552	-3.70808
Tmem63b	-0.231919	6.36552	-2.48625	0.0263695	0.248639	-3.70924
Stk38l	-0.432161	3.86003	-2.48619	0.0263724	0.248639	-3.70934
Grik4	-1.43236	-3.25859	-2.48529	0.0264181	0.248942	-3.71093
Zxdb	-0.449286	1.87015	-2.48378	0.0264949	0.249539	-3.71359
Tmem176a	0.524343	7.2674	2.48308	0.0265308	0.249749	-3.71483
1700030J22Rik	0.831181	-0.875774	2.48248	0.0265611	0.249907	-3.71588
Mrnip	-0.550247	2.75778	-2.48221	0.0265748	0.249908	-3.71635
Lepr	-1.50946	1.47229	-2.48098	0.0266379	0.250375	-3.71853
Ugt3a2	0.228069	8.35526	2.48064	0.0266551	0.250409	-3.71912
Them4	-0.308371	4.4738	-2.47968	0.0267045	0.250473	-3.72082
Itgb5	0.303827	6.05497	2.47961	0.0267081	0.250473	-3.72094
Gm20300	0.400959	4.25026	2.47945	0.026716	0.250473	-3.72121
Klkb1	-0.325419	7.93378	-2.47923	0.0267277	0.250473	-3.72162
Cdc42ep1	0.28782	4.6833	2.47915	0.0267317	0.250473	-3.72175
Cyb5rl	0.439035	3.50945	2.47892	0.0267434	0.250473	-3.72215
Nepro	-0.315595	2.50569	-2.47841	0.0267696	0.250492	-3.72305
Olr1	1.5922	-3.50262	2.47811	0.0267852	0.250492	-3.72359
Vmn2r46	0.976496	-3.7222	2.47809	0.0267861	0.250492	-3.72362
Ptprs	0.287846	2.4219	2.47762	0.02681	0.250589	-3.72444
Akap17b	0.582735	2.05998	2.47731	0.0268261	0.250612	-3.72499
Ip6k2	-0.736541	4.84164	-2.47677	0.0268537	0.250668	-3.72593
Slc7a2	-1.19649	7.90381	-2.4765	0.0268678	0.250668	-3.72641
Grid1	1.3012	0.0464851	2.47641	0.0268728	0.250668	-3.72658
Tmem184b	0.30719	4.8742	2.47587	0.0269004	0.250799	-3.72753
Cd79b	-0.568452	0.731017	-2.47499	0.0269457	0.251083	-3.72907
S1pr1	0.420965	5.96247	2.47394	0.0270002	0.251083	-3.73092
Ido2	0.488076	5.90246	2.47382	0.0270064	0.251083	-3.73113
Tdo2	-0.400076	10.2702	-2.47365	0.0270151	0.251083	-3.73143
Ccpg1os	0.261308	2.71322	2.47355	0.0270206	0.251083	-3.73161
Slco2b1	0.306327	7.03923	2.47342	0.0270274	0.251083	-3.73184
Hsd17b10	0.593551	7.29129	2.47333	0.0270319	0.251083	-3.732
Mvd	-0.787017	2.5192	-2.47318	0.0270398	0.251083	-3.73226
Stx6	0.822439	2.33084	2.47283	0.027058	0.251126	-3.73288
Mgam	-0.415635	6.55085	-2.47172	0.0271154	0.251533	-3.73482
Cd226	-0.837395	-1.40834	-2.47098	0.0271542	0.251663	-3.73614
Zbtb7c	1.57621	0.130502	2.47082	0.0271623	0.251663	-3.73641
Hnrnpa1	-0.247083	5.94366	-2.47037	0.027186	0.251663	-3.73721
Mir3569	0.249054	-4.38047	2.47031	0.0271887	0.251663	-3.7373
Gas1	0.744983	3.22507	2.47014	0.0271976	0.251663	-3.7376
Med19	0.334081	3.46507	2.46985	0.0272131	0.25168	-3.73812
Mtmr1	-0.328521	4.93719	-2.46957	0.0272275	0.251688	-3.73861
Rfx7	-0.365544	4.06128	-2.46927	0.0272434	0.251708	-3.73914
Prrc2c	-0.257753	5.33601	-2.46887	0.0272642	0.251775	-3.73984
[truncated: 16,461 more rows]

## Sheet: EMPvsHFD
SYMBOL	logFC	AveExpr	t	P.Value	adj.P.Val	B
Arntl	-1.34983	3.91477	-6.7402	1.0211e-05	0.0689756	2.70474
Hr	-2.0998	-0.0333889	-6.58681	1.30707e-05	0.0689756	2.53784
Hsd3b4	3.43668	-0.211433	6.52076	1.45514e-05	0.0689756	2.46469
Samd11	-2.62382	-3.38296	-6.50435	1.4946e-05	0.0689756	2.4464
Desi2	-0.819592	4.361	-6.26251	2.22645e-05	0.0822006	2.17124
Abcg8	0.913032	6.40865	5.89086	4.17309e-05	0.110975	1.72772
Cyp2j13	2.94887	-2.04594	5.88599	4.20814e-05	0.110975	1.72174
Gm10791	-1.91621	-3.70943	-5.77452	5.10011e-05	0.117685	1.58367
Gm13056	-3.05397	-2.8456	-5.60912	6.80527e-05	0.139584	1.37456
Fam131c	-1.01773	2.05484	-5.46273	8.81192e-05	0.158134	1.18527
Lonrf3	-1.11808	0.29302	-5.42502	9.42293e-05	0.158134	1.13587
Slc38a3	0.725055	9.76959	5.32466	0.000112743	0.167203	1.00311
Nfil3	-0.994469	5.01595	-5.30047	0.000117749	0.167203	0.970837
Abtb2	-0.92349	3.71353	-5.2149	0.000137392	0.17078	0.855818
Atg16l2	-0.773965	3.04242	-5.20938	0.00013877	0.17078	0.848354
Rab34	-0.721001	2.4316	-5.0902	0.00017233	0.198825	0.685823
Cry1	-0.891248	2.96829	-4.99403	0.000205518	0.221787	0.552814
Fdps	-1.24092	5.24668	-4.94109	0.000226561	0.221787	0.478881
Mrtfb	-0.892916	4.61453	-4.93596	0.000228712	0.221787	0.471703
4930426L09Rik	-1.3949	-3.79803	-4.88669	0.000250518	0.221787	0.40241
Slc2a5	0.844023	2.06702	4.88285	0.000252303	0.221787	0.397
Cdkn1a	-2.1868	3.63996	-4.82509	0.000280845	0.235454	0.315197
Tef	1.41504	5.9216	4.80165	0.000293361	0.235454	0.281842
Ces2a	0.594373	7.55231	4.7592	0.000317524	0.244229	0.221184
2010106E10Rik	-1.93085	-2.57097	-4.72441	0.000338857	0.248501	0.171247
Ppil6	1.28478	-1.90809	4.70593	0.000350791	0.248501	0.144628
A930033H14Rik	2.21796	1.14554	4.68645	0.000363837	0.248501	0.116519
Zfp605	-2.21167	0.618452	-4.66762	0.000376925	0.248501	0.0892862
Acat2	-0.50192	6.21499	-4.63407	0.00040146	0.25555	0.0406269
Cyp2d11	1.35474	2.73297	4.60613	0.000423159	0.256158	-5.66121e-05
A730081D07Rik	0.917889	-1.26092	4.59742	0.000430168	0.256158	-0.0127633
Tmem263	-0.463461	2.57912	-4.53006	0.000488568	0.281842	-0.111429
Tubb2a	-1.33163	6.34431	-4.47158	0.000545895	0.299359	-0.197687
Dbndd2	-0.713132	2.40787	-4.45753	0.000560667	0.299359	-0.218482
Irak2	-0.871471	4.60823	-4.45109	0.000567583	0.299359	-0.228035
Per3	2.14135	2.4825	4.42261	0.000599208	0.306639	-0.270319
Sgsm1	-1.48872	-0.182749	-4.39144	0.000635906	0.306639	-0.31674
Srcin1	-1.0255	-0.0424643	-4.36939	0.000663268	0.306639	-0.349681
Adcy9	0.67625	4.14905	4.36315	0.000671218	0.306639	-0.359004
Ciart	2.62919	-0.0648605	4.35017	0.000688098	0.306639	-0.378446
4930515G01Rik	-1.16146	-1.69174	-4.33731	0.00070524	0.306639	-0.397718
Cacng7	-0.858805	0.484577	-4.3229	0.000724974	0.306639	-0.419347
Npas2	-2.39726	1.57588	-4.31007	0.000743029	0.306639	-0.438638
Slc34a1	1.75006	1.6364	4.3069	0.000747556	0.306639	-0.443403
Mvd	-1.3695	2.5192	-4.30362	0.000752281	0.306639	-0.448346
Hif3a	2.08002	-2.91124	4.29549	0.000764105	0.306639	-0.460585
Xlr3c	-2.1357	-3.09721	-4.27755	0.000790875	0.310629	-0.487625
Sox9	-1.06282	2.26329	-4.25944	0.000818873	0.314905	-0.514964
Cyp2g1	1.96622	-0.330799	4.24682	0.000838986	0.314905	-0.534046
Tubb2b	-3.14911	2.09452	-4.23522	0.000857923	0.314905	-0.551608
Elovl5	-0.940761	8.93457	-4.22796	0.000869998	0.314905	-0.562608
Kif1a	-2.00219	-3.20707	-4.19668	0.000924061	0.327747	-0.6101
Taf1c	-0.724348	1.23253	-4.18726	0.000940987	0.327747	-0.624412
Adamtsl5	-1.17055	-0.637192	-4.11439	0.00108331	0.358351	-0.735649
Lrrc73	-1.67883	-3.74707	-4.11372	0.00108471	0.358351	-0.736671
Samd8	3.45288	3.13132	4.11171	0.00108893	0.358351	-0.739741
Mpz	1.37872	-2.02812	4.10038	0.00111308	0.358351	-0.757099
Shc4	-1.78278	-3.31328	-4.09447	0.00112591	0.358351	-0.766173
Rnd2	-0.637043	3.27778	-4.07287	0.00117405	0.367339	-0.799328
Cd248	-1.11861	-0.959574	-4.05414	0.0012175	0.371823	-0.828125
Tmem136	-0.788791	0.316223	-4.04412	0.00124141	0.371823	-0.843548
Mef2d	-0.614635	5.39887	-4.04106	0.00124881	0.371823	-0.848266
Chka	-1.15072	5.33825	-4.01811	0.00130577	0.379617	-0.88366
Nr1d2	0.920149	5.50687	4.01011	0.00132623	0.379617	-0.896006
8430429K09Rik	-1.23405	-0.771411	-3.99707	0.00136029	0.379617	-0.916151
Zbtb21	-0.939553	2.91234	-3.99692	0.00136071	0.379617	-0.916392
Mthfr	-1.55619	4.20611	-3.9905	0.00137781	0.379617	-0.926318
B3galt5	1.85947	-3.59645	3.97589	0.00141756	0.380394	-0.948929
Fgf11	-1.39331	-0.535678	-3.96988	0.00143424	0.380394	-0.958232
Azin1	0.802167	5.40567	3.96114	0.00145887	0.380394	-0.971776
Mthfd2l	-0.906085	0.511369	-3.95823	0.00146719	0.380394	-0.976299
Abcg5	0.614411	6.63126	3.9525	0.00148366	0.380394	-0.985184
Kcnj15	1.06298	0.541525	3.93995	0.0015204	0.383396	-1.00466
Por	0.798804	8.06169	3.93004	0.00155007	0.383396	-1.02005
Nudt18	-0.60725	3.52523	-3.92541	0.00156415	0.383396	-1.02725
Rit1	-0.478667	2.99651	-3.92074	0.00157844	0.383396	-1.0345
Cpt1b	-0.563488	3.22188	-3.9089	0.00161535	0.384157	-1.05292
Lif	-1.54786	-3.85067	-3.90642	0.0016232	0.384157	-1.05678
Pms1	0.532243	2.55479	3.88506	0.00169235	0.395453	-1.09005
Umod	1.81215	1.18217	3.87068	0.00174058	0.397834	-1.11247
Ccdc120	-1.2473	0.720281	-3.86297	0.00176702	0.397834	-1.1245
Igf2bp2	-0.77429	1.26243	-3.86292	0.00176719	0.397834	-1.12458
Aldoc	-1.02838	2.87201	-3.84718	0.00182244	0.399624	-1.14917
Atp6v0a4	2.78807	-2.29137	3.83132	0.00187993	0.399624	-1.17398
Cubn	1.12169	-0.0909352	3.83087	0.00188156	0.399624	-1.17467
Paics	0.564038	6.9365	3.8222	0.00191377	0.399624	-1.18824
Tmco4	0.430191	3.88051	3.8211	0.0019179	0.399624	-1.18996
Lrrc2	1.2219	-3.81328	3.82096	0.00191845	0.399624	-1.19019
Gm32468	-1.89853	1.72392	-3.81877	0.00192668	0.399624	-1.19361
Pitx3	-2.22892	0.502986	-3.79915	0.0020022	0.400179	-1.22436
Pcdhb16	1.68054	-2.61831	3.79775	0.00200767	0.400179	-1.22655
LOC115488858	1.12267	-3.91433	3.78541	0.00205683	0.400179	-1.2459
Gpx4	-0.50841	8.00062	-3.78391	0.00206291	0.400179	-1.24827
Lhx6	-0.970444	2.83508	-3.78275	0.00206758	0.400179	-1.25007
Ifi209	-0.654824	1.61049	-3.78031	0.00207751	0.400179	-1.25391
Etl4	0.428135	3.17688	3.77943	0.0020811	0.400179	-1.25529
Tfdp2	0.959799	2.33623	3.77332	0.00210619	0.400827	-1.26489
St5	-0.662484	5.44367	-3.74799	0.00221347	0.416946	-1.30468
4932441J04Rik	1.65891	-3.52298	3.73195	0.00228428	0.419459	-1.32992
Fanca	-0.943566	-0.325446	-3.73036	0.00229143	0.419459	-1.33242
Vegfb	-0.543254	3.3964	-3.72958	0.00229498	0.419459	-1.33366
Ankrd10	-0.446682	3.32675	-3.68212	0.00251928	0.450718	-1.40847
Rdh1	1.10008	3.15883	3.67669	0.00254634	0.450718	-1.41705
Id3	-0.898028	5.89973	-3.67584	0.0025506	0.450718	-1.41839
Tor3a	-0.927957	3.82601	-3.67172	0.00257135	0.450718	-1.4249
Xlr4a	-3.21614	-2.1838	-3.66502	0.00260542	0.450718	-1.43547
Dbp	3.34302	3.29813	3.65853	0.00263893	0.450718	-1.44573
Dock4	0.391187	4.48181	3.65615	0.00265133	0.450718	-1.4495
1810041H14Rik	-1.93239	-2.27408	-3.65423	0.00266134	0.450718	-1.45252
Mocs1	0.93011	5.8255	3.63957	0.00273926	0.457064	-1.47571
Rfxank	-0.620927	4.43791	-3.63789	0.00274833	0.457064	-1.47837
Mindy4	0.678763	1.34793	3.6255	0.00281619	0.463272	-1.49798
Rnf19b	0.703292	4.70972	3.62196	0.00283585	0.463272	-1.50357
Ino80	0.317421	4.38618	3.61711	0.00286309	0.46362	-1.51126
Gpcpd1	0.687556	5.77813	3.61218	0.00289103	0.464074	-1.51907
Shfl	-0.592774	6.24101	-3.60169	0.00295136	0.465134	-1.53569
Insig2	-0.611387	8.13189	-3.59479	0.00299176	0.465134	-1.54663
Celsr1	-0.724057	3.87075	-3.59413	0.00299564	0.465134	-1.54767
Haus3	-0.485086	1.90003	-3.59366	0.00299843	0.465134	-1.54842
Dcbld2	1.11627	0.827599	3.5677	0.00315583	0.485472	-1.5896
Pycr2	-0.539062	1.43443	-3.55241	0.00325238	0.496189	-1.61387
Litaf	-0.374352	6.11618	-3.53763	0.00334859	0.500301	-1.63736
Tubb1	-1.51714	-3.41926	-3.52784	0.00341387	0.500301	-1.65292
A730063M14Rik	-0.787567	0.492812	-3.52216	0.00345232	0.500301	-1.66194
Hist1h4m	-1.87594	-2.18979	-3.5205	0.0034637	0.500301	-1.6646
Ddit3	-0.966039	3.8556	-3.51786	0.00348176	0.500301	-1.66879
Snx32	-0.407666	2.33788	-3.51592	0.0034951	0.500301	-1.67187
Unc119	-0.58782	3.03363	-3.51172	0.00352418	0.500301	-1.67855
Col15a1	-0.975583	2.30678	-3.50452	0.00357461	0.500301	-1.69001
Srsf12	-1.2489	-3.89796	-3.49856	0.0036169	0.500301	-1.69949
Proser2	-0.922223	3.71605	-3.49779	0.00362241	0.500301	-1.70072
Sash1	0.439876	4.94964	3.49136	0.00366865	0.500301	-1.71095
Spon2	-0.872743	3.97121	-3.48893	0.00368636	0.500301	-1.71483
Fbxo44	-0.630058	1.39177	-3.48741	0.00369741	0.500301	-1.71725
Rhod	-0.45351	4.93239	-3.48641	0.00370467	0.500301	-1.71883
Snx29	0.459859	1.65234	3.47906	0.00375881	0.500301	-1.73054
Gm35549	-1.0156	-1.11927	-3.47045	0.00382329	0.500301	-1.74426
Col5a3	-0.696891	6.32261	-3.46893	0.00383478	0.500301	-1.74668
Pdxp	2.5072	-3.10068	3.46794	0.00384228	0.500301	-1.74826
Fosl2	-0.498497	3.5677	-3.46721	0.00384784	0.500301	-1.74943
Bet1	-0.334069	5.09107	-3.465	0.00386464	0.500301	-1.75294
Adarb1	0.453685	3.49949	3.46478	0.00386635	0.500301	-1.7533
H3c7	-1.42376	-3.61541	-3.46247	0.00388402	0.500301	-1.75698
Agap2	-0.909717	0.722631	-3.45667	0.00392874	0.500301	-1.76622
Ugt2a3	0.402064	7.77252	3.45654	0.00392978	0.500301	-1.76643
Hook1	0.565355	5.16082	3.43829	0.00407398	0.502353	-1.79553
Casp6	0.444964	4.851	3.43649	0.00408842	0.502353	-1.79839
Pnrc1	-0.608458	6.21408	-3.43571	0.00409474	0.502353	-1.79963
Trp53rka	-0.498473	2.68804	-3.43569	0.00409494	0.502353	-1.79967
Cabcoco1	0.689643	0.5197	3.43482	0.00410193	0.502353	-1.80105
Il12rb1	1.09713	-0.638042	3.43209	0.00412418	0.502353	-1.80542
Rhcg	1.73095	-3.39765	3.42786	0.00415875	0.502353	-1.81216
Acacb	-0.777427	4.92569	-3.42395	0.00419097	0.502353	-1.81839
H2-Q10	-0.500292	10.9365	-3.41944	0.00422846	0.502353	-1.82559
Klk1	1.69483	0.741509	3.41809	0.00423976	0.502353	-1.82774
Lrfn3	-0.723784	3.3115	-3.41744	0.00424524	0.502353	-1.82879
Rflnb	0.430621	0.344969	3.40524	0.00434877	0.503209	-1.84825
Il23a	-1.96063	-3.0643	-3.40413	0.0043583	0.503209	-1.85002
Dlgap1	0.565078	0.557995	3.40246	0.00437272	0.503209	-1.85269
Defb1	-1.04054	1.30278	-3.40174	0.00437896	0.503209	-1.85384
Camk2n2	-0.92899	0.515991	-3.39582	0.00443046	0.503209	-1.86329
Dbi	-0.361635	8.77246	-3.39376	0.0044486	0.503209	-1.86659
Arhgef39	-0.881916	-0.531104	-3.3922	0.00446233	0.503209	-1.86908
Tiam1	1.09123	-0.261144	3.38317	0.00454262	0.503209	-1.8835
Tbkbp1	-0.462295	2.97052	-3.37793	0.00458989	0.503209	-1.89187
Acsm5	0.365156	7.25765	3.37484	0.004618	0.503209	-1.8968
Rnpepl1	-0.371161	5.98018	-3.3707	0.00465595	0.503209	-1.90342
Nans	-0.573327	3.68877	-3.36573	0.00470195	0.503209	-1.91137
Sqle	-1.49175	3.56022	-3.36497	0.00470898	0.503209	-1.91258
Nedd4l	-0.429386	5.816	-3.35645	0.0047889	0.503209	-1.92619
H2ac13	-0.856436	-3.97846	-3.35181	0.00483306	0.503209	-1.93361
Cd8a	-1.39817	-0.390696	-3.35111	0.00483971	0.503209	-1.93472
Gm20257	-1.03747	1.05018	-3.34893	0.00486065	0.503209	-1.93821
Dhcr7	-0.922722	4.84332	-3.34798	0.00486975	0.503209	-1.93973
Ypel2	-0.564847	4.35437	-3.34535	0.00489521	0.503209	-1.94394
Clic3	-2.56964	-0.0324782	-3.34498	0.00489872	0.503209	-1.94452
Srebf1	0.737024	6.33026	3.34494	0.00489912	0.503209	-1.94459
Reep4	-0.569862	3.13915	-3.34332	0.00491485	0.503209	-1.94718
Pgrmc2	-0.288474	5.9988	-3.34318	0.00491622	0.503209	-1.94741
Znrf3	0.651609	3.37056	3.34229	0.00492482	0.503209	-1.94882
S100a10	-0.683175	6.68757	-3.33859	0.00496096	0.503209	-1.95474
Cyp2e1	0.559905	12.717	3.33857	0.00496122	0.503209	-1.95478
Dph1	0.786928	3.87841	3.33546	0.00499182	0.503547	-1.95975
1600012H06Rik	-0.395394	4.82012	-3.32586	0.00508739	0.505674	-1.9751
Blnk	-0.604726	0.428616	-3.32422	0.00510394	0.505674	-1.97772
Upp2	1.55149	5.92247	3.32069	0.00513968	0.505674	-1.98337
Apba1	1.17193	-0.942293	3.32039	0.00514271	0.505674	-1.98385
Slc12a3	1.51647	-0.569182	3.31485	0.00519939	0.505674	-1.99272
Mfsd10	-0.427546	1.59121	-3.31328	0.00521553	0.505674	-1.99522
Csrnp1	1.10555	3.03129	3.31061	0.00524313	0.505674	-1.99949
Gale	-0.902931	3.43128	-3.31024	0.00524695	0.505674	-2.00008
Lag3	-1.42609	-0.133568	-3.30904	0.00525945	0.505674	-2.00201
Pmvk	-0.560347	4.49443	-3.29932	0.00536144	0.512809	-2.01755
Rsf1os2	-1.5176	-3.44369	-3.29523	0.00540499	0.514173	-2.0241
Mettl27	-0.880611	2.91833	-3.29276	0.0054314	0.514173	-2.02805
Cltrn	1.34444	0.187493	3.28677	0.00549609	0.514378	-2.03763
Eps8l2	-0.407084	6.94985	-3.28523	0.00551289	0.514378	-2.0401
Hilpda	-0.851114	1.24325	-3.28467	0.00551893	0.514378	-2.04099
Grk5	-0.448001	2.60459	-3.27924	0.00557849	0.514378	-2.04968
Lgalsl	-0.732102	4.113	-3.27734	0.00559948	0.514378	-2.05272
Plin5	-0.580218	5.99068	-3.27723	0.00560076	0.514378	-2.05291
Nenf	-0.627298	2.60464	-3.26868	0.00569616	0.520127	-2.06658
Dhrs9	-1.12361	1.30083	-3.26659	0.00571971	0.520127	-2.06992
Tbc1d22b	-0.367172	2.67459	-3.26236	0.00576777	0.521161	-2.0767
Tdo2	0.527017	10.2702	3.25853	0.00581167	0.521161	-2.08284
Smarcd1	-0.76556	3.50728	-3.25817	0.00581578	0.521161	-2.08341
Pnkd	-0.563727	7.39555	-3.25369	0.00586752	0.523258	-2.09059
Gm14296	1.84502	1.7089	3.24409	0.00597983	0.527589	-2.10594
Gpi1	-0.325341	7.44302	-3.24408	0.00597997	0.527589	-2.10596
Ifi27l2b	-1.02208	3.4608	-3.24224	0.00600183	0.527589	-2.10892
Ucp2	-0.421557	5.02739	-3.2367	0.0060679	0.52951	-2.11778
Wee1	1.03422	2.08452	3.23379	0.00610291	0.52951	-2.12245
Nr2c2ap	-0.439491	3.21051	-3.23173	0.00612774	0.52951	-2.12573
Dbndd1	1.0872	-1.51529	3.23045	0.00614335	0.52951	-2.1278
Smpd3	-1.25225	1.0196	-3.22809	0.00617202	0.52951	-2.13157
Irs3	-1.69777	-2.97931	-3.22615	0.00619578	0.52951	-2.13468
Hist1h4n	-1.3188	-2.93501	-3.22214	0.00624504	0.53126	-2.1411
Ccng2	-0.625792	3.91852	-3.20684	0.00643671	0.535937	-2.16559
Sh3pxd2a	-0.524576	5.74235	-3.20445	0.00646729	0.535937	-2.16943
Slc5a2	2.10517	-2.69272	3.20378	0.00647578	0.535937	-2.17049
Dtx4	-0.616989	4.2708	-3.20115	0.00650958	0.535937	-2.17471
Cyp2c29	0.674032	10.2945	3.19939	0.00653217	0.535937	-2.17752
Rnf113a2	-0.337786	2.98605	-3.1967	0.006567	0.535937	-2.18183
Folh1	1.8802	-3.49597	3.1957	0.00658003	0.535937	-2.18344
Praf2	-0.851948	1.58355	-3.19422	0.00659932	0.535937	-2.18581
Izumo1r	-1.56468	-3.68106	-3.19001	0.00665438	0.535937	-2.19254
Rhbdd2	0.351283	4.13552	3.1852	0.00671803	0.535937	-2.20026
Nelfa	-0.432848	3.79904	-3.18493	0.00672157	0.535937	-2.20069
Kras	-0.327889	4.92354	-3.18131	0.00676976	0.535937	-2.20648
Mep1a	1.10988	1.14836	3.18027	0.00678374	0.535937	-2.20815
Gpr108	0.298184	4.43559	3.17818	0.00681185	0.535937	-2.2115
Tnfrsf10b	-1.30318	-1.45861	-3.17622	0.0068383	0.535937	-2.21464
Ankrd13b	-0.540655	2.1097	-3.16789	0.00695167	0.535937	-2.22797
BC106179	1.23893	-0.743147	3.16768	0.00695457	0.535937	-2.22831
Ptp4a1	0.754229	5.10273	3.16742	0.00695822	0.535937	-2.22873
BC025920	-0.575675	0.550139	-3.16414	0.00700346	0.535937	-2.23399
Apoc2	-0.977981	6.04025	-3.16264	0.00702421	0.535937	-2.23638
Mafb	1.25788	5.49643	3.16182	0.00703564	0.535937	-2.2377
Nradd	-1.16673	-0.952106	-3.16092	0.00704805	0.535937	-2.23913
2010003K11Rik	-0.982782	4.59652	-3.15603	0.00711649	0.535937	-2.24697
Pxmp4	-0.669622	7.34041	-3.15563	0.00712214	0.535937	-2.24761
Pgm5	0.803025	0.34295	3.15528	0.00712711	0.535937	-2.24817
Hmgcs1	-1.07505	6.82429	-3.15477	0.00713432	0.535937	-2.24899
Cry2	0.621419	4.88212	3.15474	0.00713472	0.535937	-2.24904
Fam89a	-0.85328	2.7752	-3.14958	0.00720779	0.535937	-2.2573
Slc39a13	-0.493939	3.58106	-3.14743	0.00723846	0.535937	-2.26074
1700048O20Rik	-1.59284	-0.727584	-3.14704	0.00724411	0.535937	-2.26138
Aprt	-0.630243	3.96467	-3.14617	0.00725655	0.535937	-2.26277
Stat5a	-0.501017	4.24368	-3.14609	0.00725765	0.535937	-2.26289
Kcnn4	-0.859642	-1.01514	-3.14446	0.00728105	0.535937	-2.2655
Plg	0.324791	11.2186	3.14132	0.00732631	0.535937	-2.27052
H2bc15	-1.14833	-1.62128	-3.14125	0.00732734	0.535937	-2.27064
Gm2061	-0.891744	1.51979	-3.14002	0.00734518	0.535937	-2.27261
Cenps	-1.52718	-3.6053	-3.13413	0.00743114	0.537883	-2.28204
Lcn12	-2.1153	-2.60152	-3.13177	0.00746586	0.537883	-2.28582
Kcnj16	1.4675	0.53236	3.13171	0.00746671	0.537883	-2.28591
4933430I17Rik	1.50558	-3.68268	3.12906	0.0075059	0.537883	-2.29016
Glb1l2	2.28929	-3.06342	3.12828	0.00751755	0.537883	-2.29142
Srpx	-1.97703	-2.74485	-3.12501	0.0075662	0.538935	-2.29665
Slc22a8	1.48449	-1.07267	3.12161	0.00761717	0.538935	-2.30209
Fgf1	0.626147	6.89825	3.12143	0.00761983	0.538935	-2.30238
Syt1	0.581704	3.79328	3.11728	0.0076825	0.539667	-2.30902
Clpx	-0.652704	7.84992	-3.11688	0.00768865	0.539667	-2.30967
Bcl2l15	-1.7594	-2.42776	-3.10395	0.00788738	0.551519	-2.33036
Nat10	-0.304221	4.37489	-3.10188	0.00791971	0.55169	-2.33368
Cyp2c54	0.730177	8.41038	3.09677	0.00800011	0.555196	-2.34187
Fads1	-0.522943	8.53502	-3.09435	0.00803829	0.555696	-2.34573
Gm15348	-1.94151	-2.65873	-3.09252	0.00806752	0.555696	-2.34868
1700017B05Rik	-0.40032	3.46098	-3.09049	0.00809982	0.555846	-2.35192
Fnbp1	-0.314976	4.53913	-3.08652	0.00816363	0.55815	-2.35828
Pdk4	-1.18289	4.24651	-3.08223	0.00823299	0.558686	-2.36514
Vmn1r6	0.738213	-4.21741	3.08114	0.0082507	0.558686	-2.36689
Taok3	0.572069	5.70591	3.08043	0.00826226	0.558686	-2.36802
Gtpbp3	-0.435456	2.71012	-3.07445	0.00836042	0.562775	-2.3776
Zfp609	0.433764	4.57278	3.07197	0.00840144	0.562775	-2.38157
Gm8016	-1.92635	-1.79737	-3.07054	0.00842517	0.562775	-2.38386
Wt1os	-0.725187	-4.22176	-3.06936	0.00844468	0.562775	-2.38573
Upb1	0.283534	8.35671	3.06219	0.00856498	0.56357	-2.39721
Nbeal2	-0.398301	3.63372	-3.06172	0.00857294	0.56357	-2.39796
AA467197	-1.08621	-3.93734	-3.06083	0.00858804	0.56357	-2.39939
Lix1l	0.352436	2.47004	3.05832	0.00863069	0.56357	-2.40341
Wdr35	0.662245	1.58073	3.05166	0.00874476	0.56357	-2.41406
Tjp3	-0.572931	5.05225	-3.05117	0.00875328	0.56357	-2.41485
LOC115488885	0.782491	-4.05349	3.04848	0.00879981	0.56357	-2.41915
Ube2e3	0.465106	4.43456	3.04733	0.00881977	0.56357	-2.42099
Mettl7a3	1.31223	-3.36041	3.04712	0.00882347	0.56357	-2.42133
Trmt9b	-0.678757	2.93991	-3.04638	0.00883639	0.56357	-2.42251
Pcyox1l	-1.28741	-0.516956	-3.04415	0.00887533	0.56357	-2.42608
Lin37	-0.467009	3.2347	-3.04408	0.00887655	0.56357	-2.42619
Slc22a12	1.64716	0.427833	3.04313	0.00889323	0.56357	-2.42771
Dhrs7b	-0.380704	4.23092	-3.04168	0.00891867	0.56357	-2.43003
Tmem252	0.639209	0.515805	3.03661	0.00900824	0.56357	-2.43814
Ddc	-0.387955	5.94736	-3.03659	0.00900874	0.56357	-2.43818
Treh	-0.953472	1.16439	-3.03404	0.00905408	0.56357	-2.44225
Cyp2c23	0.518388	8.35432	3.0335	0.00906376	0.56357	-2.44312
Sigmar1	-0.368041	6.98499	-3.03284	0.00907553	0.56357	-2.44417
Pi15	-1.85222	-3.14254	-3.03268	0.00907832	0.56357	-2.44442
Mtnr1a	-0.687531	1.88756	-3.0316	0.00909771	0.56357	-2.44615
Slc11a2	-0.438687	5.14353	-3.02715	0.00917794	0.566638	-2.45328
Ncald	0.52193	4.30382	3.02133	0.00928377	0.571261	-2.46258
1700037H04Rik	-0.625976	2.01604	-3.0175	0.00935424	0.571839	-2.46871
Ppbp	-1.67096	-1.29938	-3.01647	0.0093732	0.571839	-2.47035
Kctd2	-0.448282	4.48799	-3.0145	0.00940969	0.571839	-2.47351
Ggct	-0.499134	2.62309	-3.0141	0.00941706	0.571839	-2.47414
Reep5	-0.470927	3.84627	-3.01082	0.00947817	0.573663	-2.47939
Glis2	-0.879206	-0.062124	-3.00613	0.00956616	0.576185	-2.48689
Osm	-1.3203	-3.88568	-3.00437	0.00959937	0.576185	-2.4897
Ptpmt1	-0.506116	5.45956	-3.00268	0.00963141	0.576185	-2.4924
Slc25a14	0.724201	0.606776	2.99964	0.00968936	0.576185	-2.49727
Rhbg	-0.897909	2.80074	-2.99834	0.00971407	0.576185	-2.49933
Usp2	1.67156	2.17171	2.99803	0.00972018	0.576185	-2.49984
Nsdhl	-0.742715	4.70875	-2.99708	0.00973833	0.576185	-2.50136
Bbs1	0.595905	0.5208	2.99256	0.00982549	0.577656	-2.50858
Tmem63b	0.278516	6.36552	2.98578	0.00995751	0.577656	-2.51941
Nfx1	0.282183	5.63936	2.98408	0.00999088	0.577656	-2.52213
M5C1000I18Rik	-1.23708	-4.05113	-2.98323	0.0100077	0.577656	-2.52349
Alyref2	-0.514185	1.55676	-2.98256	0.0100208	0.577656	-2.52455
Mfsd4b1	0.427861	5.32605	2.98219	0.0100282	0.577656	-2.52515
Gpr173	-1.63308	-3.51787	-2.98196	0.0100328	0.577656	-2.52552
Nfe2	-0.985127	-0.959363	-2.98124	0.0100469	0.577656	-2.52666
Hrh1	1.32065	-3.47132	2.97948	0.0100818	0.577656	-2.52947
Cttnbp2nl	1.31894	1.87861	2.9749	0.0101732	0.577656	-2.5368
Panx2	-1.19749	-3.45118	-2.97424	0.0101863	0.577656	-2.53784
Iqcd	-1.96499	-3.14337	-2.97424	0.0101864	0.577656	-2.53785
Tob2	0.672786	5.44358	2.97276	0.0102161	0.577656	-2.54021
Tspo	-0.433553	4.92822	-2.97186	0.0102343	0.577656	-2.54165
Prxl2a	-0.426738	5.74734	-2.9686	0.0103002	0.577656	-2.54686
Clec2e	-1.45679	-2.36303	-2.96709	0.0103308	0.577656	-2.54926
Msh2	0.487685	2.91877	2.96361	0.0104019	0.577656	-2.55483
Grk4	-0.731557	-0.310503	-2.9628	0.0104185	0.577656	-2.55612
1600023N17Rik	-0.761497	-2.55995	-2.96261	0.0104224	0.577656	-2.55643
Gmds	0.703011	0.882046	2.96246	0.0104255	0.577656	-2.55667
Ly6d	-1.83211	2.2711	-2.96098	0.0104559	0.577656	-2.55903
Dcaf11	0.338087	7.60367	2.95975	0.0104812	0.577656	-2.56099
Synpo	-0.690776	2.45054	-2.9582	0.0105133	0.577656	-2.56347
Cyp24a1	1.51596	-3.15995	2.95794	0.0105185	0.577656	-2.56388
Tbc1d10a	0.442745	3.34922	2.95664	0.0105455	0.577656	-2.56595
Wdr91	-0.44047	4.43316	-2.9521	0.0106402	0.581118	-2.5732
8430430B14Rik	-0.876411	-4.17135	-2.95023	0.0106795	0.581542	-2.57619
Ppp1r11	-0.497438	4.70768	-2.94665	0.0107548	0.582579	-2.5819
Slc34a2	-1.27926	1.14849	-2.94633	0.0107616	0.582579	-2.58241
Ifitm10	1.30266	-1.5568	2.94339	0.0108241	0.584246	-2.5871
Spred1	0.361155	3.9374	2.93447	0.0110157	0.590452	-2.60134
2700097O09Rik	-0.458695	2.72046	-2.93431	0.0110193	0.590452	-2.6016
Xlr4b	-3.02702	-2.31489	-2.93358	0.011035	0.590452	-2.60276
Bricd5	-1.29126	-3.66617	-2.92721	0.0111742	0.595968	-2.61292
Snora44	-1.53942	-2.74199	-2.92592	0.0112027	0.595968	-2.61499
Man2c1os	-0.569494	-0.190072	-2.92381	0.0112491	0.596719	-2.61834
Naa50	0.383039	5.48618	2.92111	0.011309	0.598178	-2.62265
Zc3h6	1.40473	1.03558	2.91907	0.0113544	0.598865	-2.62591
Fasn	-0.525521	6.89326	-2.91557	0.0114328	0.599891	-2.63148
Havcr1	-1.1182	-4.09075	-2.9153	0.0114389	0.599891	-2.63191
Agt	0.303595	9.33111	2.91211	0.0115109	0.600948	-2.637
Crip2	-0.518036	4.77996	-2.91076	0.0115416	0.600948	-2.63917
Celf4	1.14605	-1.51971	2.91009	0.0115567	0.600948	-2.64023
Pdcd1	-1.58246	-3.64035	-2.90785	0.0116076	0.601901	-2.64379
Prdm16os	1.09106	-4.0998	2.90292	0.0117208	0.606068	-2.65166
Cps1	0.567184	11.1361	2.90048	0.0117769	0.606158	-2.65554
Xkr9	0.440307	3.83933	2.9	0.0117882	0.606158	-2.65632
Cd9	-0.604532	3.65008	-2.89826	0.0118285	0.606519	-2.65908
Slc12a6	0.719089	3.5735	2.89687	0.011861	0.606519	-2.6613
Spatc1	-0.818581	-4.19062	-2.89061	0.0120076	0.607061	-2.67127
Eno2	-1.7063	-2.97257	-2.89015	0.0120185	0.607061	-2.672
Pcyt2	-0.333132	8.77522	-2.89004	0.0120212	0.607061	-2.67219
Hoxa9	1.24912	-4.04711	2.88988	0.0120248	0.607061	-2.67243
Senp7	0.400722	1.93461	2.88941	0.012036	0.607061	-2.67318
Cib3	-2.44674	1.6328	-2.88562	0.0121258	0.609507	-2.67921
Ptger2	0.638927	0.201988	2.88459	0.0121505	0.609507	-2.68086
Vpreb3	-1.89991	-3.05952	-2.8782	0.012304	0.615534	-2.69104
Crtc3	-0.33769	4.14345	-2.87207	0.0124529	0.617549	-2.7008
Trim72	-1.81648	-1.66029	-2.87183	0.0124588	0.617549	-2.70118
Cyp3a57	-0.852826	-4.01429	-2.87177	0.0124602	0.617549	-2.70128
Obp2a	-1.84202	0.368013	-2.87019	0.0124988	0.617549	-2.70378
Samd10	-0.757838	0.551104	-2.86967	0.0125115	0.617549	-2.70461
Exosc3	-0.37463	3.01576	-2.86709	0.0125753	0.618423	-2.70873
Clcnka	1.29008	-3.78197	2.86589	0.0126049	0.618423	-2.71064
Tmem52b	1.92144	-2.80834	2.86488	0.0126298	0.618423	-2.71223
Kap	1.44885	3.81269	2.86205	0.0127003	0.618715	-2.71675
Gprasp1	-0.380495	3.20473	-2.86025	0.0127452	0.618715	-2.71961
Kbtbd4	0.853971	2.65063	2.86017	0.0127471	0.618715	-2.71973
Gfod1	-0.520795	1.38947	-2.85926	0.0127698	0.618715	-2.72117
Acsm2	1.37513	2.28115	2.85511	0.0128742	0.619829	-2.72778
Map4k1	-0.866521	-0.289683	-2.8506	0.0129887	0.619829	-2.73495
A630089N07Rik	1.11893	-1.52644	2.84881	0.0130344	0.619829	-2.7378
Gabrr2	-1.6456	-3.41641	-2.84818	0.0130505	0.619829	-2.73881
H1f2	-0.550643	5.25159	-2.84728	0.0130736	0.619829	-2.74024
1110008P14Rik	-0.587956	3.84164	-2.84533	0.0131237	0.619829	-2.74334
Rhbdf2	-0.379491	3.46373	-2.84382	0.0131627	0.619829	-2.74574
Ceacam2	-1.01382	3.61686	-2.84222	0.0132038	0.619829	-2.74827
Serpina3m	0.497916	8.48136	2.84	0.0132615	0.619829	-2.75181
Ces1c	0.273289	11.3549	2.83821	0.0133081	0.619829	-2.75465
Tm4sf20	-1.4728	-2.03091	-2.83647	0.0133536	0.619829	-2.75742
Klc2	-0.281255	3.11266	-2.83592	0.0133681	0.619829	-2.7583
Ocstamp	-0.942561	-0.0417316	-2.8359	0.0133687	0.619829	-2.75833
Cdpf1	-0.530316	1.53122	-2.83499	0.0133924	0.619829	-2.75977
Fchsd1	-0.916243	0.670935	-2.83464	0.0134015	0.619829	-2.76032
Mir7059	0.388467	-4.10778	2.83452	0.0134048	0.619829	-2.76052
Tmem119	-0.932605	-0.887086	-2.83428	0.0134112	0.619829	-2.76091
Gm4788	0.424113	7.79441	2.83238	0.0134613	0.619829	-2.76393
Nckap5	0.786045	-0.977463	2.83151	0.0134842	0.619829	-2.76531
Syde2	0.645265	2.19179	2.82803	0.0135765	0.619829	-2.77084
Ttc39a	-1.66447	-0.314576	-2.8266	0.0136145	0.619829	-2.7731
Plppr2	-0.765579	2.70786	-2.82568	0.013639	0.619829	-2.77456
Bbs9	-0.403146	1.73469	-2.82522	0.0136514	0.619829	-2.7753
Teddm1b	1.25007	-2.43425	2.82419	0.0136788	0.619829	-2.77692
Fut2	-1.83072	-2.99835	-2.82292	0.0137129	0.619829	-2.77894
Apoa4	-1.53424	9.19967	-2.82273	0.0137181	0.619829	-2.77925
Zfp808	0.970062	-2.13195	2.82003	0.013791	0.619829	-2.78354
Lrrc4	-1.17825	-3.71638	-2.81991	0.0137942	0.619829	-2.78373
Nr1d1	1.15296	6.65948	2.81917	0.0138141	0.619829	-2.7849
Htatsf1	0.26652	4.55557	2.81447	0.0139419	0.619829	-2.79236
Cyb5r3	-0.402718	8.88108	-2.8118	0.0140151	0.619829	-2.79661
Gm6034	-1.17074	-3.83551	-2.81136	0.0140272	0.619829	-2.79731
Nat1	0.481332	0.639788	2.81115	0.0140328	0.619829	-2.79763
Homez	1.7895	0.844678	2.81105	0.0140357	0.619829	-2.7978
Tle6	-0.432872	1.03692	-2.80857	0.0141039	0.619829	-2.80173
Rab11fip1	0.582011	3.03255	2.80804	0.0141186	0.619829	-2.80257
Ttc32	-0.340315	3.03451	-2.80688	0.0141507	0.619829	-2.80441
Trim7	-0.932827	3.46219	-2.80615	0.0141709	0.619829	-2.80557
Slc16a6	-0.602831	3.32759	-2.8056	0.0141863	0.619829	-2.80645
Epc2	0.2562	3.7066	2.8036	0.014242	0.619829	-2.80962
Lipc	0.336998	7.40099	2.80354	0.0142435	0.619829	-2.80971
Mal	0.572323	-0.608179	2.80347	0.0142456	0.619829	-2.80983
Zfp652	-0.25669	5.43585	-2.80229	0.0142785	0.619829	-2.8117
Sorbs2os	-0.855599	-2.64991	-2.80101	0.0143142	0.619829	-2.81373
Stat5b	-0.302795	5.94407	-2.80017	0.0143378	0.619829	-2.81506
Slc16a1	-0.543349	6.14343	-2.79947	0.0143574	0.619829	-2.81616
Prom2	1.39287	-3.65716	2.79899	0.0143709	0.619829	-2.81693
Gm43568	-1.61826	-1.06776	-2.79464	0.0144939	0.622483	-2.82383
Snord104	-0.918595	0.273842	-2.79443	0.0144999	0.622483	-2.82417
Irf2	0.391932	5.55661	2.79301	0.0145401	0.622553	-2.82641
2010109A12Rik	-1.2878	-2.28959	-2.792	0.014569	0.622553	-2.82802
Dcun1d4	0.430242	5.43203	2.78783	0.0146883	0.624117	-2.83463
Il4	1.22126	-3.52977	2.78734	0.0147024	0.624117	-2.83541
Zmym5	0.58239	4.50988	2.78608	0.0147387	0.624117	-2.83741
Cenpw	-1.01927	-0.525294	-2.78514	0.0147658	0.624117	-2.83889
1700092C10Rik	1.72212	-2.67781	2.78484	0.0147746	0.624117	-2.83938
Htra3	-0.727216	0.950177	-2.77985	0.0149194	0.628796	-2.84728
Gcnt7	-1.8553	-2.44082	-2.77689	0.0150062	0.629773	-2.85197
Itpka	-0.539051	0.376862	-2.77673	0.0150108	0.629773	-2.85223
Napsa	0.768657	1.22808	2.77255	0.0151339	0.632411	-2.85884
Abcc2	0.310656	9.42318	2.77227	0.0151422	0.632411	-2.85929
4930505N22Rik	1.06389	-2.93377	2.77005	0.0152081	0.632436	-2.8628
AV039307	-1.65162	-2.54816	-2.76994	0.0152114	0.632436	-2.86298
Tomm40l	0.728626	5.4597	2.76805	0.0152678	0.633145	-2.86598
Fam110a	-0.661138	1.32411	-2.76707	0.015297	0.633145	-2.86753
Blcap	-0.38842	4.89217	-2.76471	0.0153676	0.634644	-2.87126
Gm765	-1.28373	-0.810188	-2.76219	0.0154436	0.635064	-2.87525
Gm5086	-1.56506	-2.98269	-2.7608	0.0154855	0.635064	-2.87745
Cul3	0.242295	5.84616	2.75899	0.0155405	0.635064	-2.88032
Bmyc	-0.871708	1.78323	-2.75877	0.0155471	0.635064	-2.88066
Tasp1	0.382625	2.39545	2.75811	0.0155671	0.635064	-2.8817
Ormdl1	0.271615	4.53691	2.75747	0.0155865	0.635064	-2.88271
Tmem174	1.4018	-1.29247	2.75642	0.0156186	0.635064	-2.88438
Frmd8	-0.281355	3.85997	-2.75383	0.0156979	0.636885	-2.88848
Eno4	-1.64078	-2.93313	-2.74964	0.015827	0.640436	-2.89511
Ndrg4	-1.44842	-2.97717	-2.74637	0.0159282	0.640436	-2.90028
Dact1	0.658646	1.54786	2.74479	0.0159775	0.640436	-2.90278
Rxra	0.260767	8.74366	2.74277	0.0160405	0.640436	-2.90597
Snrnp200	0.357318	6.2565	2.74253	0.0160482	0.640436	-2.90635
Nrm	-0.452866	-0.0180145	-2.74208	0.0160622	0.640436	-2.90706
Arsg	-0.65311	4.40187	-2.74132	0.0160861	0.640436	-2.90826
Tigd3	1.6886	-2.1303	2.74084	0.0161011	0.640436	-2.90902
Mrap	-0.389981	5.58831	-2.73858	0.0161724	0.640436	-2.91259
Ccdc78	-1.29011	-3.78108	-2.73841	0.0161777	0.640436	-2.91286
Tnfrsf12a	-0.682636	2.12067	-2.73818	0.0161851	0.640436	-2.91323
Ttc38	0.369363	6.22786	2.73765	0.0162017	0.640436	-2.91406
Mad1l1	-0.325606	3.15813	-2.73469	0.0162955	0.642769	-2.91874
Cmc1	0.573901	2.73975	2.73272	0.0163584	0.643474	-2.92186
1700003E24Rik	-0.523887	-4.28885	-2.73187	0.0163854	0.643474	-2.92319
Wdpcp	0.494017	0.997587	2.73068	0.0164235	0.643474	-2.92507
Bend5	1.02999	-2.66893	2.72941	0.0164645	0.643474	-2.92709
Ube2v2	1.10429	2.50718	2.72868	0.0164877	0.643474	-2.92823
Mir1968	0.623549	-3.00784	2.72749	0.0165263	0.643619	-2.93012
Pum1	0.429351	5.29005	2.72367	0.0166499	0.644124	-2.93615
Paxx	-1.32619	3.066	-2.72258	0.0166853	0.644124	-2.93788
Lmntd2	-0.603556	0.818001	-2.7218	0.0167105	0.644124	-2.93909
Actn1	0.490871	4.69387	2.7204	0.0167564	0.644124	-2.94132
Insyn1	-1.81717	-3.68415	-2.72039	0.0167567	0.644124	-2.94133
B3gnt9	-0.665376	-0.633675	-2.71899	0.0168026	0.644124	-2.94354
Zfp651	-0.735593	0.373774	-2.71874	0.0168107	0.644124	-2.94393
Car12	1.109	-1.24964	2.71598	0.0169015	0.644124	-2.94829
Arrdc3	1.09617	7.15201	2.71596	0.016902	0.644124	-2.94832
Enpep	0.439654	5.95342	2.71346	0.0169845	0.644124	-2.95226
Lncpint	-1.16216	-1.8751	-2.70908	0.0171303	0.644124	-2.95918
Spag5	-1.09187	-0.552819	-2.70828	0.0171568	0.644124	-2.96043
Lrp10	-0.387012	5.07363	-2.70632	0.0172226	0.644124	-2.96353
Akr1c21	1.07336	0.129856	2.70627	0.0172241	0.644124	-2.9636
C7	1.8436	-1.15767	2.70581	0.0172396	0.644124	-2.96433
S100g	2.14378	-2.2997	2.70548	0.0172509	0.644124	-2.96485
Cep97	-0.541242	2.05752	-2.70258	0.0173486	0.644124	-2.96943
Nefh	1.30448	-1.97003	2.7023	0.017358	0.644124	-2.96986
Spry4	1.1281	3.19954	2.70226	0.0173594	0.644124	-2.96993
Tnfrsf9	-1.63973	-3.72092	-2.70225	0.0173597	0.644124	-2.96995
Rtl6	0.834858	-1.53099	2.70137	0.0173894	0.644124	-2.97133
Faap20	-0.417064	2.89037	-2.69945	0.0174547	0.644124	-2.97436
Agbl5	0.304238	2.93716	2.69832	0.0174932	0.644124	-2.97614
Aurka	-0.604824	1.35286	-2.69719	0.0175316	0.644124	-2.97792
Neo1	0.425417	3.91608	2.69703	0.0175371	0.644124	-2.97817
Nectin1	-0.644281	5.65131	-2.6969	0.0175415	0.644124	-2.97837
Pdcd4	0.37384	5.50218	2.69632	0.0175615	0.644124	-2.9793
Lrpprc	0.262423	6.63779	2.69627	0.0175631	0.644124	-2.97937
Zfp251	-0.548132	0.742721	-2.69572	0.0175818	0.644124	-2.98023
Vmn2r20	-0.826782	-1.08963	-2.69546	0.017591	0.644124	-2.98066
P3h1	-0.284729	3.73454	-2.6913	0.0177341	0.644124	-2.98721
Borcs6	-0.341895	2.64206	-2.68977	0.0177869	0.644124	-2.98961
Mbnl2	-0.524915	4.09765	-2.68564	0.0179304	0.644124	-2.99612
Micos10	-0.450345	4.82984	-2.68526	0.0179438	0.644124	-2.99672
Lrp4	0.397536	4.41627	2.68457	0.017968	0.644124	-2.99781
Mir1247	0.383918	-4.33551	2.68355	0.0180036	0.644124	-2.99941
Slc22a6	1.98045	-0.516465	2.68333	0.0180112	0.644124	-2.99975
Il2rb	-0.547306	1.69867	-2.68312	0.0180185	0.644124	-3.00008
Pde3b	0.319817	5.94936	2.68292	0.0180257	0.644124	-3.0004
Skap1	-1.50103	-1.6579	-2.68276	0.0180314	0.644124	-3.00066
Dnajc1	0.335915	4.77816	2.67882	0.0181701	0.644124	-3.00686
Kitl	0.646306	0.968699	2.67879	0.0181711	0.644124	-3.0069
Commd7	-0.357162	4.42315	-2.67804	0.0181975	0.644124	-3.00808
Ino80e	-0.481551	3.26593	-2.67738	0.018221	0.644124	-3.00912
Racgap1	-1.35768	-0.0255105	-2.67611	0.0182661	0.644124	-3.01112
Hectd2	-0.485223	0.621016	-2.67522	0.0182977	0.644124	-3.01252
Fxyd2	1.1747	0.668733	2.67493	0.0183079	0.644124	-3.01297
Adh6a	-1.6314	-1.95457	-2.67441	0.0183265	0.644124	-3.01379
Hcn2	-2.25139	-1.73265	-2.67313	0.0183724	0.644124	-3.01581
Guk1	-0.297457	4.84346	-2.67213	0.0184082	0.644124	-3.01739
Tmem271	-0.874011	-4.00234	-2.66847	0.0185396	0.644124	-3.02314
Atp1a1	0.45734	8.01648	2.66791	0.0185597	0.644124	-3.02402
Mycbpap	1.12413	-3.86052	2.66672	0.0186028	0.644124	-3.0259
Arl4a	-0.624488	5.32815	-2.66627	0.0186192	0.644124	-3.02661
Gsk3b	1.0667	4.3861	2.66612	0.0186243	0.644124	-3.02683
Rtp3	-0.41767	6.36569	-2.66601	0.0186286	0.644124	-3.02701
Gpx3	0.883644	4.76881	2.66576	0.0186374	0.644124	-3.0274
Klhl20	0.546094	3.32789	2.66503	0.0186642	0.644124	-3.02856
Zc3h12b	1.47981	-2.61393	2.66468	0.0186766	0.644124	-3.0291
Dusp23	-0.392708	4.0747	-2.66439	0.0186873	0.644124	-3.02956
Cyld	0.541204	3.13582	2.6643	0.0186906	0.644124	-3.0297
Slc16a14	1.00923	-4.04791	2.66334	0.0187255	0.644124	-3.03121
Map3k13	-0.592866	4.72807	-2.66301	0.0187375	0.644124	-3.03173
4930459C07Rik	-1.35599	-2.20068	-2.6602	0.0188401	0.646446	-3.03614
Ttc41	-0.869538	1.62559	-2.65882	0.0188909	0.646865	-3.03832
Psrc1	-1.47781	-1.484	-2.65664	0.0189711	0.646865	-3.04175
Txndc17	-0.218075	5.77714	-2.65629	0.018984	0.646865	-3.0423
Pgap3	0.681637	1.08664	2.65346	0.0190885	0.646865	-3.04674
Nat8f7	-1.52957	-2.13733	-2.6533	0.0190945	0.646865	-3.04699
Chd3	0.341263	7.39179	2.65258	0.0191211	0.646865	-3.04812
Qrich1	0.408486	4.66317	2.65231	0.0191314	0.646865	-3.04855
Dkc1	0.308664	3.68182	2.65227	0.0191326	0.646865	-3.0486
Lrp2	0.780302	1.42229	2.64879	0.0192625	0.650066	-3.05407
Efnb1	-0.285987	4.05907	-2.64668	0.0193415	0.651539	-3.05738
Cyp51	-0.777242	5.67076	-2.64456	0.0194213	0.653037	-3.06071
Hkdc1	-1.28854	-1.14381	-2.64116	0.0195499	0.653894	-3.06604
Bach1	0.406438	4.71528	2.63799	0.0196707	0.653894	-3.07102
Uprt	1.13186	-1.12148	2.63763	0.0196846	0.653894	-3.07159
Usp4	0.400382	6.22372	2.63714	0.0197034	0.653894	-3.07236
Bend4	0.973582	-0.484972	2.63553	0.0197649	0.653894	-3.07488
Ttc30a2	0.792552	-0.850351	2.63514	0.01978	0.653894	-3.0755
Med1	0.314515	4.5609	2.63353	0.0198416	0.653894	-3.07801
Lncbate1	1.59906	-0.917528	2.63344	0.0198453	0.653894	-3.07816
Slc17a4	-0.656054	5.15243	-2.63326	0.019852	0.653894	-3.07844
Psmb9	-0.420639	3.58001	-2.63281	0.0198694	0.653894	-3.07914
S100a6	-0.692768	0.222281	-2.63198	0.0199014	0.653894	-3.08045
Gm7467	-1.57973	-3.09128	-2.63117	0.019933	0.653894	-3.08173
4930405A21Rik	-1.13253	-2.79715	-2.63108	0.0199363	0.653894	-3.08186
Isg20	-0.501593	1.85461	-2.63092	0.0199427	0.653894	-3.08212
Runx2	-1.39515	-1.5674	-2.62803	0.0200546	0.654972	-3.08664
Gm5577	1.09671	-2.38176	2.6262	0.020126	0.654972	-3.08951
Hmbs	-0.471849	5.28376	-2.62571	0.0201451	0.654972	-3.09028
Kdsr	-0.370402	4.52748	-2.62199	0.0202911	0.654972	-3.09612
Rusc1	-0.467138	2.70589	-2.62091	0.0203335	0.654972	-3.0978
Cenpp	-1.90187	-3.04045	-2.62004	0.0203679	0.654972	-3.09917
Camk2b	-1.28863	1.99227	-2.61998	0.0203704	0.654972	-3.09926
Fut9	1.7642	-2.20906	2.61997	0.0203705	0.654972	-3.09927
Cacna1h	-1.49752	-3.46578	-2.61942	0.0203923	0.654972	-3.10013
Cdc20	-1.75482	-0.19574	-2.61692	0.0204914	0.654972	-3.10405
Inmt	0.626466	8.83231	2.61469	0.0205801	0.654972	-3.10754
Tubb3	-1.04451	-3.3409	-2.6144	0.0205919	0.654972	-3.108
Ncaph	-1.28778	-0.475747	-2.61138	0.0207125	0.654972	-3.11272
Tmem209	0.5309	3.2331	2.60858	0.0208253	0.654972	-3.11711
Nrg1	-1.20646	-0.947768	-2.60833	0.0208354	0.654972	-3.1175
Prrg1	1.04883	-0.858606	2.60826	0.0208382	0.654972	-3.11761
Myl6b	-0.502277	0.391148	-2.60783	0.0208555	0.654972	-3.11828
LOC115488214	-0.99276	-2.51214	-2.6073	0.0208771	0.654972	-3.11911
Lima1	0.443291	6.06224	2.60719	0.0208817	0.654972	-3.11929
Pah	0.36968	9.54965	2.60715	0.0208831	0.654972	-3.11934
Med11	-0.284699	3.08361	-2.60704	0.0208875	0.654972	-3.11951
Sgk2	0.341018	6.43013	2.60648	0.0209103	0.654972	-3.12039
Ccnb2	-1.18522	0.12663	-2.60567	0.0209431	0.654972	-3.12166
Phc2	-0.361751	4.94555	-2.60532	0.0209574	0.654972	-3.12221
BC005624	0.204929	4.96068	2.60524	0.0209606	0.654972	-3.12234
Gm31508	-0.911956	-0.477419	-2.60514	0.0209647	0.654972	-3.12249
Gcnt1	0.819536	-0.268641	2.60442	0.0209939	0.654972	-3.12362
Ceacam18	-1.08453	-3.45708	-2.60403	0.02101	0.654972	-3.12424
Nlrc3	0.660262	-0.643902	2.60145	0.021115	0.654972	-3.12826
Tmem97	-0.440584	5.62752	-2.60111	0.0211288	0.654972	-3.12879
Narf	0.538267	5.29742	2.59987	0.0211796	0.654972	-3.13073
Mtrf1	0.41294	2.90747	2.59968	0.0211875	0.654972	-3.13103
Mir8113	-0.807171	-3.90241	-2.59934	0.0212017	0.654972	-3.13157
Ccdc61	-0.351733	1.9815	-2.59902	0.0212145	0.654972	-3.13206
Tsacc	-0.346209	0.841882	-2.59895	0.0212174	0.654972	-3.13217
Pdxk-ps	-0.808729	-4.01712	-2.59805	0.0212546	0.655025	-3.13358
Plcg1	0.369937	5.56255	2.59387	0.0214271	0.659242	-3.14011
Ube2l3	-0.884149	5.46822	-2.59138	0.0215307	0.659446	-3.144
Zc3h3	-0.304883	2.97347	-2.59134	0.0215323	0.659446	-3.14406
5430416N02Rik	-0.417743	2.14495	-2.58983	0.0215956	0.659446	-3.14643
Ly6g	-1.48694	-3.544	-2.58964	0.0216032	0.659446	-3.14672
Dpp7	-0.417284	4.26079	-2.58942	0.0216124	0.659446	-3.14706
Grina	-0.375543	7.39505	-2.58703	0.0217126	0.659666	-3.1508
Donson	0.351777	1.27733	2.5865	0.0217352	0.659666	-3.15163
Loxl4	-0.997439	1.19884	-2.58368	0.021854	0.659666	-3.15603
Slfn10-ps	1.11326	-3.68433	2.58276	0.0218929	0.659666	-3.15747
Bhlhe41	1.99344	-0.0237514	2.58072	0.0219793	0.659666	-3.16065
Pycard	-0.650265	0.467707	-2.5805	0.021989	0.659666	-3.16101
Cops8	0.269022	3.88948	2.57946	0.022033	0.659666	-3.16262
Mal2	-0.320113	5.57687	-2.57816	0.0220886	0.659666	-3.16465
Pim2	-0.617956	1.66427	-2.57801	0.0220948	0.659666	-3.16488
Miox	1.59478	0.490815	2.57765	0.0221104	0.659666	-3.16545
Tmem88b	-0.427296	1.61689	-2.57573	0.0221924	0.659666	-3.16844
Afp	-0.660991	0.649899	-2.57333	0.022296	0.659666	-3.17219
Slc38a6	-0.260832	2.8627	-2.57242	0.022335	0.659666	-3.1736
Bmp8b	-1.66026	-2.45785	-2.57159	0.0223708	0.659666	-3.1749
Pcdhb14	1.12893	-1.51158	2.57124	0.0223861	0.659666	-3.17545
Npnt	-1.02371	0.781202	-2.57001	0.0224394	0.659666	-3.17737
Ccna2	-0.931096	0.921867	-2.56867	0.0224977	0.659666	-3.17946
Serpinb10	1.44242	-3.6477	2.56717	0.022563	0.659666	-3.1818
Gm10804	1.16423	0.775198	2.56483	0.0226653	0.659666	-3.18545
BC029722	-0.418586	3.86607	-2.56352	0.0227226	0.659666	-3.18749
Slc16a9	1.00333	1.25849	2.56267	0.0227601	0.659666	-3.18882
Klb	0.450228	4.86159	2.56254	0.0227655	0.659666	-3.18901
Slc5a10	1.47413	-3.53249	2.56238	0.0227726	0.659666	-3.18926
Glra4	-1.31646	-3.85284	-2.56061	0.0228504	0.659666	-3.19201
Mtmr11	-0.83651	0.86793	-2.56007	0.0228745	0.659666	-3.19286
Kctd7	-0.458967	1.06351	-2.56002	0.0228768	0.659666	-3.19294
Htr2b	-1.0705	-4.03265	-2.55956	0.0228971	0.659666	-3.19366
Pias1	0.299803	4.18113	2.5592	0.0229128	0.659666	-3.19421
Ticrr	-0.90741	-2.58303	-2.55686	0.0230168	0.659666	-3.19786
Tubb5	-0.37976	5.45992	-2.5553	0.023086	0.659666	-3.20029
Nat8f5	-0.961771	2.87384	-2.55437	0.0231275	0.659666	-3.20173
Cyp2d26	0.257412	9.60259	2.55413	0.0231383	0.659666	-3.20211
Ctla4	-1.16632	-3.74822	-2.55251	0.0232108	0.659666	-3.20464
Net1	-0.544088	6.6266	-2.55091	0.0232828	0.659666	-3.20713
2021-03-06	0.293259	6.82865	2.55082	0.0232867	0.659666	-3.20727
Trmt11	0.356142	2.10777	2.55046	0.0233028	0.659666	-3.20782
Svopl	-0.797574	-4.12363	-2.55041	0.0233051	0.659666	-3.2079
1700003E16Rik	0.379068	0.57689	2.54978	0.0233333	0.659666	-3.20888
Rpl38	-0.664388	5.76173	-2.54894	0.0233711	0.659666	-3.21018
Arhgef33	0.794789	-4.13074	2.54816	0.0234063	0.659666	-3.2114
Selenow	-0.418939	6.07807	-2.54805	0.0234115	0.659666	-3.21158
Abca1	0.299335	7.0906	2.54751	0.023436	0.659666	-3.21242
Rcbtb1	0.200867	6.09179	2.54709	0.0234547	0.659666	-3.21306
Eef1akmt1	-0.341721	2.37748	-2.5468	0.0234682	0.659666	-3.21353
Mertk	0.570707	4.5047	2.54561	0.023522	0.659666	-3.21537
Dsg2	0.427422	6.79041	2.54511	0.0235445	0.659666	-3.21615
Copz2	-0.377948	3.97116	-2.54496	0.0235517	0.659666	-3.21639
Atf5	-0.422554	8.52637	-2.54483	0.0235575	0.659666	-3.21659
Lzts3	0.282925	4.98666	2.54407	0.0235918	0.659666	-3.21776
Tmtc4	0.469103	2.03631	2.54398	0.0235959	0.659666	-3.2179
Elovl3	-1.36166	8.2151	-2.54368	0.0236095	0.659666	-3.21837
6030466F02Rik	-0.988502	-3.92807	-2.54311	0.0236357	0.659666	-3.21926
Btnl4	1.01128	-3.86884	2.54227	0.0236739	0.659666	-3.22056
Slc16a12	0.436761	5.34781	2.54213	0.0236803	0.659666	-3.22078
Slc7a13	1.7308	-1.05749	2.54163	0.0237034	0.659666	-3.22157
Mug1	0.431184	12.2423	2.54064	0.0237486	0.659666	-3.2231
Chmp6	0.268525	3.84027	2.54044	0.0237575	0.659666	-3.22341
Rdh11	-0.403902	4.35728	-2.54006	0.0237752	0.659666	-3.22401
Spryd3	-0.23094	4.10421	-2.53949	0.0238013	0.659666	-3.22489
Crtc2	0.237678	5.38232	2.53932	0.0238091	0.659666	-3.22515
Gm26628	1.13248	-1.94967	2.53878	0.023834	0.659666	-3.226
4930525G20Rik	0.775855	-1.52962	2.53856	0.0238442	0.659666	-3.22634
Zbtb22	0.369368	4.01681	2.53758	0.023889	0.659666	-3.22785
Vps25	-0.602525	5.22325	-2.53693	0.0239192	0.659666	-3.22887
E230015B07Rik	-1.25914	-3.18072	-2.53539	0.0239903	0.659666	-3.23127
Cyp2a5	1.22237	8.58243	2.53373	0.0240669	0.659666	-3.23384
Arhgef15	0.542179	2.87838	2.53355	0.0240754	0.659666	-3.23412
LOC115489638	-0.73886	-4.15257	-2.53337	0.024084	0.659666	-3.23441
Nt5c3b	-0.553363	1.04552	-2.53295	0.0241033	0.659666	-3.23505
Daam1	0.289885	5.67488	2.53172	0.0241606	0.659666	-3.23697
Mapkapk3	-0.412049	2.41598	-2.53169	0.0241617	0.659666	-3.23701
Tarsl2	0.344726	3.44066	2.53103	0.0241925	0.659666	-3.23803
Ccl4	-1.79018	-2.48171	-2.52846	0.0243127	0.661171	-3.24203
Msmo1	-0.897155	5.36074	-2.52709	0.0243772	0.661171	-3.24416
Pick1	-0.327726	4.2463	-2.52708	0.0243777	0.661171	-3.24418
Mir6917	-0.55812	-4.06022	-2.52679	0.024391	0.661171	-3.24462
Scarna13	-0.834899	-3.91539	-2.52405	0.0245205	0.661729	-3.24888
4930579G24Rik	-0.782008	-0.260562	-2.52252	0.0245925	0.661729	-3.25125
Nuf2	-1.8897	-1.51333	-2.52203	0.024616	0.661729	-3.25202
Ceacam16	-0.800918	-4.12251	-2.52201	0.0246169	0.661729	-3.25205
Fbxo9	0.269141	5.70134	2.52165	0.0246339	0.661729	-3.2526
Senp2	0.3224	4.62129	2.52056	0.0246854	0.661729	-3.25429
Zfp946	0.551351	3.68115	2.51985	0.0247194	0.661729	-3.25539
Heatr9	-1.29608	-3.68758	-2.51813	0.0248017	0.661729	-3.25807
Tfeb	0.389018	2.47509	2.51769	0.0248222	0.661729	-3.25874
Msmp	1.17193	-2.78058	2.51741	0.0248357	0.661729	-3.25918
Fn1	0.298042	10.2429	2.51697	0.0248569	0.661729	-3.25986
Adora2b	-1.52389	-3.73242	-2.51678	0.0248659	0.661729	-3.26015
Ifitm1	-0.290606	3.05754	-2.51654	0.0248776	0.661729	-3.26053
Def6	-1.45245	-1.54296	-2.5143	0.0249848	0.662723	-3.264
Acadsb	0.591497	5.78292	2.51426	0.0249867	0.662723	-3.26406
Trim59	-0.779125	-0.787224	-2.51348	0.0250244	0.662769	-3.26527
Ampd3	0.65771	0.540829	2.51203	0.0250946	0.663222	-3.26753
Mad2l2	-0.466387	3.99526	-2.51164	0.0251133	0.663222	-3.26813
Slc4a8	1.77333	-1.34912	2.50964	0.0252099	0.663682	-3.27122
4930404N11Rik	-1.17565	-3.10665	-2.50914	0.0252342	0.663682	-3.272
Mab21l3	-1.70337	-0.985868	-2.50905	0.0252386	0.663682	-3.27214
Iqck	-1.07159	-2.63264	-2.50724	0.0253268	0.664008	-3.27495
Mx1	-0.472243	1.48723	-2.50614	0.0253803	0.664008	-3.27665
Sh3bp2	0.234813	4.31329	2.50493	0.0254398	0.664008	-3.27853
Gm19461	0.769722	-0.92646	2.5049	0.0254411	0.664008	-3.27857
Srsf1	0.37087	5.28355	2.50461	0.0254553	0.664008	-3.27902
Aldh1a7	-0.295076	7.7209	-2.50437	0.0254668	0.664008	-3.27939
Zbtb2	0.306301	2.73139	2.50322	0.0255234	0.664068	-3.28117
Hmg20b	-0.286668	4.10135	-2.50267	0.0255502	0.664068	-3.28202
Clic5	1.66166	0.347913	2.50124	0.0256206	0.664068	-3.28424
LOC115485835	-0.715913	-4.07804	-2.50002	0.025681	0.664068	-3.28613
Hbs1l	0.246616	5.50526	2.49994	0.0256848	0.664068	-3.28625
Prep	0.276812	5.2995	2.49911	0.0257261	0.664068	-3.28755
Nipal3	-0.306113	3.49301	-2.49856	0.0257533	0.664068	-3.2884
Ndfip1	0.357071	6.59962	2.49848	0.0257569	0.664068	-3.28851
Sestd1	0.399783	1.60259	2.49767	0.0257974	0.664185	-3.28977
Uox	0.383695	10.5369	2.49415	0.0259721	0.66605	-3.29521
Rbms1	0.324835	5.16935	2.49407	0.0259763	0.66605	-3.29534
Exoc3l2	0.451223	2.28852	2.49333	0.0260134	0.66605	-3.29649
Cby1	-0.384607	2.75393	-2.49306	0.026027	0.66605	-3.29691
Bsnd	1.48275	-3.70724	2.49257	0.0260513	0.66605	-3.29766
Flt3l	-0.373548	2.915	-2.49187	0.0260864	0.66605	-3.29874
Ttll4	0.407375	3.8713	2.4893	0.0262157	0.668427	-3.30272
Mical2	-0.360358	4.98211	-2.48581	0.0263921	0.668787	-3.30812
C1s2	0.51989	2.88461	2.48385	0.0264915	0.668787	-3.31114
Sox6os	-0.741035	0.547056	-2.48342	0.0265133	0.668787	-3.3118
Pebp1	-0.294158	6.86551	-2.48296	0.0265368	0.668787	-3.31252
Tsen54	-0.545051	1.91007	-2.48243	0.0265637	0.668787	-3.31333
Stra6l	-0.299347	7.59765	-2.48172	0.0266001	0.668787	-3.31444
Map7d1	-0.310293	5.17709	-2.48146	0.0266135	0.668787	-3.31484
Alkbh6	-0.648939	2.61871	-2.48039	0.0266681	0.668787	-3.31649
Hoxd9	1.10051	-3.90971	2.48018	0.0266789	0.668787	-3.31682
Rph3al	-0.461993	1.64181	-2.47988	0.0266942	0.668787	-3.31728
Scaper	0.440251	2.25417	2.47939	0.0267193	0.668787	-3.31803
Capn15	-0.309675	4.34892	-2.47918	0.0267299	0.668787	-3.31835
Slc1a5	-0.549376	1.26913	-2.47822	0.0267793	0.668787	-3.31984
Tmem35b	-0.328291	2.71341	-2.47684	0.0268502	0.668787	-3.32197
Spindoc	-0.522526	1.5501	-2.47599	0.0268941	0.668787	-3.32328
Rbpj	0.289772	4.03776	2.47511	0.0269396	0.668787	-3.32464
Pif1	-1.7467	-2.13555	-2.47486	0.0269525	0.668787	-3.32502
Cyp21a1	-1.59821	-1.03802	-2.473	0.0270488	0.668787	-3.32789
Rchy1	-0.5374	4.29829	-2.47282	0.0270585	0.668787	-3.32818
Tmem185a	-0.256423	3.79909	-2.47126	0.0271396	0.668787	-3.33059
Mir3569	-0.249054	-4.38047	-2.47031	0.0271887	0.668787	-3.33204
Eno3	-0.459413	2.35381	-2.4702	0.0271944	0.668787	-3.33221
Trnp1	-1.29427	-3.91007	-2.46885	0.0272653	0.668787	-3.33431
Gm14164	-0.956328	-3.97697	-2.46657	0.0273846	0.668787	-3.33782
Sdhaf3	0.220448	2.54855	2.46605	0.0274122	0.668787	-3.33863
Adprh	-0.340934	2.46868	-2.46521	0.0274564	0.668787	-3.33993
Cfhr1	0.322747	7.01471	2.46428	0.027505	0.668787	-3.34135
Foxd2	0.853098	-4.09694	2.46393	0.0275235	0.668787	-3.34189
Zfp518a	-0.579668	1.86883	-2.46315	0.0275649	0.668787	-3.3431
Timm22	-0.755782	2.26598	-2.46299	0.0275731	0.668787	-3.34334
Srd5a1	-0.57931	6.60895	-2.46285	0.0275806	0.668787	-3.34355
Usp54	0.300924	2.69227	2.46162	0.0276456	0.668787	-3.34545
Rogdi	-0.527	4.32802	-2.46121	0.0276676	0.668787	-3.34609
Cnn3	0.481324	5.8424	2.46111	0.0276728	0.668787	-3.34624
Egf	0.816198	0.711989	2.46009	0.0277268	0.668787	-3.3478
Add3	0.638948	3.52617	2.45993	0.0277358	0.668787	-3.34806
Gm36435	-0.71948	-0.50113	-2.4594	0.0277638	0.668787	-3.34888
Hsd17b1	-1.03561	-2.4376	-2.45863	0.0278045	0.668787	-3.35006
Amigo1	0.8111	2.93099	2.45848	0.0278129	0.668787	-3.3503
Rep15	-1.38443	-2.08786	-2.45826	0.0278244	0.668787	-3.35063
Klhl12	0.226961	3.94426	2.45674	0.0279058	0.668787	-3.35298
Cstf3	-0.410401	3.66495	-2.45669	0.0279082	0.668787	-3.35305
Duxbl1	0.86962	-3.78905	2.45644	0.0279214	0.668787	-3.35343
Ddx6	0.866114	5.75853	2.45487	0.0280058	0.668787	-3.35586
Chtf18	-1.37654	-2.44628	-2.45463	0.0280189	0.668787	-3.35623
Plekha8	-0.280516	4.93844	-2.45381	0.0280626	0.668787	-3.35749
Spaar	0.916066	-1.59298	2.45309	0.0281015	0.668787	-3.3586
Gm36738	-0.478462	1.12351	-2.45231	0.0281434	0.668787	-3.3598
Lrrc55	-1.11593	-3.98497	-2.45204	0.028158	0.668787	-3.36021
Dguok	-0.328993	3.51221	-2.45157	0.0281834	0.668787	-3.36094
Tab2	-0.283406	6.40645	-2.45143	0.0281911	0.668787	-3.36116
Susd1	0.289824	2.89549	2.45107	0.0282104	0.668787	-3.36171
Pyurf	-0.292459	4.27196	-2.45095	0.028217	0.668787	-3.3619
Slc25a48	0.479718	3.49164	2.44921	0.0283108	0.668787	-3.36456
Gm15743	1.10738	-2.35178	2.44895	0.0283249	0.668787	-3.36496
Prdx1	-0.410328	9.35341	-2.44828	0.0283615	0.668787	-3.366
Sco2	-0.649163	3.6954	-2.44826	0.0283625	0.668787	-3.36603
Cdkn2a	1.43435	-3.62071	2.44801	0.028376	0.668787	-3.36641
Ppp1r12a	-0.645243	4.39077	-2.44761	0.0283978	0.668787	-3.36703
Mir24-2	-0.24808	-4.38079	-2.4475	0.0284041	0.668787	-3.36721
Polr3a	0.254522	4.21071	2.44543	0.0285164	0.668787	-3.37038
Stim1	0.444302	4.85538	2.44532	0.0285227	0.668787	-3.37055
Aass	0.36504	8.14403	2.44434	0.0285762	0.668787	-3.37206
Meltf	-0.839482	-4.10085	-2.44322	0.0286377	0.668787	-3.37379
Dgat2	0.278592	8.40577	2.44271	0.0286657	0.668787	-3.37458
Ppia	-0.440972	8.22104	-2.44225	0.0286908	0.668787	-3.37528
Slmap	0.696704	4.95884	2.44163	0.0287246	0.668787	-3.37622
Bcdin3d	-0.652182	1.48695	-2.44149	0.0287326	0.668787	-3.37645
Zc3h7b	0.257679	5.40788	2.44082	0.0287693	0.668787	-3.37747
Aqp8	-0.843062	5.92524	-2.44028	0.028799	0.668787	-3.3783
Pgp	-0.406938	3.81681	-2.4394	0.0288476	0.668787	-3.37966
Smim11	-0.341957	3.68129	-2.43893	0.0288738	0.668787	-3.38038
Alg10b	0.722615	4.84161	2.43891	0.0288745	0.668787	-3.38041
Zfp980	-0.996222	-0.671209	-2.43598	0.0290369	0.671707	-3.38491
Cyp2j11	1.73535	-2.92285	2.43516	0.0290824	0.671816	-3.38617
Slc1a7	0.830216	-4.11275	2.43417	0.0291375	0.671816	-3.38769
Zfp810	-0.490292	2.4882	-2.43358	0.0291709	0.671816	-3.38861
Scpep1	-0.227003	5.01571	-2.43285	0.0292113	0.671816	-3.38972
Pa2g4	0.223259	6.30496	2.43263	0.0292236	0.671816	-3.39006
1700001G17Rik	-0.862858	-3.30913	-2.43075	0.0293292	0.672241	-3.39296
Sec11c	-0.396967	4.20243	-2.43044	0.0293462	0.672241	-3.39342
Clmn	0.364491	7.04595	2.42959	0.0293941	0.672241	-3.39473
Spopl	0.303124	3.53858	2.42916	0.0294181	0.672241	-3.39539
Adcy1	-0.723103	-1.28372	-2.42893	0.0294312	0.672241	-3.39575
Gm15612	-1.24919	-3.50006	-2.42841	0.0294606	0.672241	-3.39655
Shisa5	0.743807	4.83435	2.42748	0.029513	0.672579	-3.39797
Abl2	-0.561647	3.30584	-2.42685	0.0295483	0.672579	-3.39893
AI413582	-0.66164	1.18233	-2.42338	0.0297452	0.676226	-3.40427
Rbl2	0.289377	5.23718	2.42262	0.029788	0.676367	-3.40542
Serpinb6b	-0.654767	2.14509	-2.42192	0.0298278	0.676439	-3.40649
Ubash3b	0.696332	0.686219	2.42054	0.0299066	0.677245	-3.40861
LOC105242405	1.52548	-3.52948	2.41953	0.0299643	0.677245	-3.41016
Fbxl15	-0.591371	1.5552	-2.41845	0.0300264	0.677245	-3.41182
Nrde2	0.28474	3.3429	2.41807	0.0300485	0.677245	-3.41241
Nr2c1	0.512001	3.3185	2.41691	0.0301148	0.677245	-3.41418
1110051M20Rik	-0.557344	3.36944	-2.41664	0.0301306	0.677245	-3.4146
Lcn2	-1.27401	4.03449	-2.41602	0.0301661	0.677245	-3.41555
Col9a3	-1.4775	-3.45896	-2.41535	0.0302048	0.677245	-3.41658
Mien1	-0.375654	5.19821	-2.41521	0.0302126	0.677245	-3.41679
Uck1	-0.426032	5.46819	-2.41482	0.0302353	0.677245	-3.41739
Gm16062	-0.483136	0.211001	-2.41407	0.0302785	0.677245	-3.41853
Gnat1	0.644824	3.33933	2.41334	0.0303208	0.677245	-3.41965
Pdlim3	-1.69859	-2.11691	-2.413	0.0303403	0.677245	-3.42017
Ost4	-0.339542	5.77495	-2.41235	0.0303781	0.677269	-3.42117
2900076A07Rik	-0.457479	1.4707	-2.41169	0.0304166	0.677311	-3.42219
Kctd17	-0.510143	1.83907	-2.41018	0.030504	0.677368	-3.42449
1700102H20Rik	-0.784068	-4.11995	-2.40891	0.0305781	0.677368	-3.42644
Insrr	1.34883	-3.5814	2.40881	0.0305844	0.677368	-3.4266
Tob1	0.428152	6.94202	2.40845	0.0306054	0.677368	-3.42715
Klk1b4	-0.51621	1.43968	-2.40798	0.0306326	0.677368	-3.42786
Cox8a	-0.412737	7.26393	-2.40751	0.0306604	0.677368	-3.42859
Hsf2bp	-1.14819	-1.246	-2.40598	0.03075	0.677368	-3.43093
Hspb1	-0.953269	4.60484	-2.40587	0.0307564	0.677368	-3.4311
Bbs5	0.429178	0.864737	2.40537	0.0307858	0.677368	-3.43187
Pafah1b3	-0.425983	1.20002	-2.40438	0.0308439	0.677368	-3.43338
Gm16731	-1.52881	0.0657113	-2.40338	0.0309028	0.677368	-3.43491
2210406O10Rik	-0.776059	-0.686903	-2.40332	0.0309061	0.677368	-3.435
Gcsam	-1.48745	-3.15236	-2.40287	0.0309328	0.677368	-3.43569
4930556N13Rik	-0.76211	-2.75735	-2.40287	0.0309329	0.677368	-3.43569
5430427O19Rik	-1.15479	-1.61707	-2.39992	0.0311074	0.678226	-3.44021
St3gal1	-0.377133	6.86173	-2.39989	0.031109	0.678226	-3.44025
Map3k15	0.48696	1.05958	2.39957	0.0311282	0.678226	-3.44074
Pbk	-1.81579	-1.78502	-2.39911	0.0311555	0.678226	-3.44144
Rabep2	-0.408844	3.22655	-2.39864	0.031183	0.678226	-3.44215
Dio3os	1.35649	-0.639955	2.39848	0.0311925	0.678226	-3.4424
Ppara	0.605783	6.43544	2.39718	0.0312699	0.678394	-3.44439
Tcta	-0.320923	4.42147	-2.39709	0.0312756	0.678394	-3.44453
Fam187b	-0.750776	1.65196	-2.3965	0.0313105	0.678394	-3.44543
Kif18b	-1.46943	-2.28603	-2.39586	0.0313487	0.678426	-3.4464
Ccdc134	-0.757757	2.53807	-2.3939	0.0314664	0.679451	-3.44941
Acot10	-0.853398	-3.73643	-2.3938	0.0314721	0.679451	-3.44955
Sh3bgrl	-0.206885	6.0926	-2.39323	0.0315065	0.679451	-3.45043
Crlf2	-0.507006	1.75938	-2.39261	0.0315439	0.679463	-3.45138
Nrip3	1.02459	-3.95118	2.38905	0.0317585	0.682696	-3.45682
Psmg4	-0.395585	2.23888	-2.38758	0.0318472	0.682696	-3.45906
Rac1	-1.05824	6.33879	-2.38718	0.0318715	0.682696	-3.45967
Stam2	0.268998	3.95497	2.38642	0.031918	0.682696	-3.46084
Serpina1f	1.74337	-2.81131	2.38581	0.0319548	0.682696	-3.46176
Nmnat1	-0.288922	4.12705	-2.38556	0.0319704	0.682696	-3.46215
Thap4	-0.623696	3.31533	-2.3855	0.0319736	0.682696	-3.46223
Dnah8	-0.478318	-0.339178	-2.38524	0.0319898	0.682696	-3.46264
Mir1198	0.873854	-3.68188	2.38406	0.0320614	0.683434	-3.46443
Mir3069	-0.235471	-4.24599	-2.38327	0.0321101	0.683683	-3.46565
H2afx	-0.616191	3.18021	-2.38159	0.0322126	0.684432	-3.4682
Serinc2	-0.59056	4.27628	-2.38148	0.0322195	0.684432	-3.46837
Tmem80	-0.592172	2.73273	-2.37892	0.0323768	0.684444	-3.47228
A930011G23Rik	0.697656	3.52817	2.37881	0.0323837	0.684444	-3.47245
Cep55	-1.36949	-2.26243	-2.37871	0.0323898	0.684444	-3.4726
Taldo1	-0.261376	6.37801	-2.37811	0.032427	0.684444	-3.47352
4930471M09Rik	-0.709274	-4.14425	-2.37751	0.0324636	0.684444	-3.47442
Snph	-1.0567	-3.98542	-2.37742	0.0324696	0.684444	-3.47457
D130040H23Rik	-1.21595	-3.11675	-2.37641	0.0325319	0.684444	-3.47611
Commd10	-0.57903	2.32988	-2.37639	0.0325328	0.684444	-3.47613
Kcnj2	-0.831975	-0.10415	-2.37492	0.0326242	0.684444	-3.47838
Tns2	0.52534	6.4939	2.37453	0.0326481	0.684444	-3.47896
Mkrn2os	-0.311184	4.25412	-2.37426	0.0326651	0.684444	-3.47938
Dynlrb1	-0.281668	6.47027	-2.37365	0.0327029	0.684444	-3.48031
Cd33	0.641693	0.783168	2.37287	0.0327514	0.684444	-3.48149
Igsf1	1.12556	-3.04044	2.3712	0.0328558	0.684444	-3.48404
Zfp935	0.39216	1.96409	2.3698	0.0329431	0.684444	-3.48617
Map2k6	1.05222	1.27218	2.36974	0.0329468	0.684444	-3.48626
Fbxl19	-0.408312	2.69478	-2.36928	0.0329758	0.684444	-3.48697
Ldhal6b	-1.4742	-3.34343	-2.36866	0.0330146	0.684444	-3.48791
Bhlhe40	0.588609	6.36028	2.36775	0.0330721	0.684444	-3.4893
Tuba8	-1.18018	0.906585	-2.36763	0.0330794	0.684444	-3.48948
Serpind1	0.239557	9.20862	2.36755	0.0330845	0.684444	-3.4896
Tspan31	-0.374094	7.89022	-2.36673	0.0331359	0.684444	-3.49085
Gsdme	-0.484344	3.37432	-2.36603	0.0331804	0.684444	-3.49192
Ccnk	0.243365	4.22694	2.36597	0.033184	0.684444	-3.49201
Brip1	0.588363	0.73049	2.36522	0.0332316	0.684444	-3.49315
Rmdn2	0.401543	5.37745	2.36399	0.0333091	0.684444	-3.49502
Gm10681	1.34619	-1.4309	2.36398	0.0333097	0.684444	-3.49504
Nlk	-0.280791	3.22188	-2.36216	0.0334254	0.684444	-3.49781
Zfp354b	0.347552	1.36079	2.36188	0.0334428	0.684444	-3.49823
Asb13	-0.234585	5.54796	-2.36182	0.0334466	0.684444	-3.49832
Dgcr8	0.341284	3.27819	2.36121	0.0334858	0.684444	-3.49926
Ndufaf2	-0.259613	3.20938	-2.36116	0.0334887	0.684444	-3.49933
Klf13	0.551368	4.91279	2.36061	0.0335241	0.684444	-3.50017
Alg14	-0.179595	3.9003	-2.36012	0.0335552	0.684444	-3.50092
Rps19bp1	-0.423369	3.3565	-2.35983	0.0335735	0.684444	-3.50135
Pef1	-0.251445	5.1703	-2.35977	0.0335771	0.684444	-3.50144
Adar	0.219066	4.7146	2.35871	0.0336452	0.684444	-3.50306
Pls3	0.354972	6.20699	2.357	0.0337546	0.684444	-3.50566
Sec22b	-0.265906	5.06666	-2.35698	0.0337557	0.684444	-3.50569
Trabd2b	0.507358	-0.785856	2.35694	0.0337585	0.684444	-3.50575
Xpr1	0.393516	4.92816	2.35683	0.0337657	0.684444	-3.50592
Upp1	0.591199	1.42745	2.35664	0.0337773	0.684444	-3.5062
Bst2	-0.38953	7.00053	-2.3556	0.0338447	0.684956	-3.50779
LOC115490273	1.02097	-3.74851	2.3551	0.0338767	0.684956	-3.50855
Lrp1	0.264783	9.71197	2.3542	0.0339344	0.685371	-3.50991
D930048N14Rik	-0.456006	3.4415	-2.35255	0.034041	0.686193	-3.51242
Cst6	1.13598	-3.63285	2.35242	0.0340495	0.686193	-3.51262
St8sia1	1.7193	-2.70435	2.35141	0.0341143	0.686751	-3.51415
Tor2a	-0.55126	4.55477	-2.35007	0.0342012	0.68725	-3.51618
Fign	0.51443	2.35264	2.34988	0.0342136	0.68725	-3.51647
Mypop	-0.731354	1.10058	-2.34787	0.0343444	0.689127	-3.51953
Prkca	0.570012	3.45122	2.34695	0.0344044	0.689582	-3.52092
Dph3	0.270959	3.49561	2.34591	0.0344723	0.689925	-3.5225
Pnkp	-0.391671	4.39432	-2.34555	0.0344962	0.689925	-3.52306
Vrk1	0.22927	2.24692	2.3438	0.0346107	0.690773	-3.52571
Lrrn3	0.694615	-0.136305	2.34314	0.0346541	0.690773	-3.52671
Smco4	-0.633981	2.59675	-2.34251	0.0346954	0.690773	-3.52766
Zfp87	0.287166	2.22115	2.34242	0.0347012	0.690773	-3.5278
Idi1	-0.780045	4.92381	-2.34205	0.0347258	0.690773	-3.52836
Fbxo21	0.330622	7.15869	2.34077	0.0348103	0.6911	-3.53031
Uap1l1	-0.773159	2.87605	-2.34045	0.0348315	0.6911	-3.5308
Crcp	0.312547	3.3058	2.3401	0.0348545	0.6911	-3.53133
Mir7578	0.563374	-3.70441	2.33737	0.0350354	0.69142	-3.53547
Tspan12	0.246094	6.79031	2.33666	0.0350825	0.69142	-3.53654
Lysmd3	-0.633622	3.60809	-2.33507	0.0351885	0.69142	-3.53896
2210039B01Rik	-0.572733	1.24451	-2.33486	0.0352026	0.69142	-3.53927
Sh3bgrl3	-0.357518	3.13545	-2.33396	0.0352626	0.69142	-3.54064
Arhgef7	-0.265197	4.94775	-2.33383	0.0352709	0.69142	-3.54082
Rhog	-0.328504	4.43819	-2.33353	0.0352908	0.69142	-3.54128
Tk1	0.586555	4.00956	2.33298	0.0353277	0.69142	-3.54211
Slc6a18	1.69307	-1.30413	2.33258	0.0353545	0.69142	-3.54272
Gtf3c4	0.313635	4.46347	2.33091	0.0354669	0.69142	-3.54526
Fgf21	-1.35607	3.40751	-2.33029	0.0355085	0.69142	-3.5462
4931440F15Rik	1.08998	-2.73431	2.32914	0.0355859	0.69142	-3.54794
Megf6	-0.80103	-0.841875	-2.32883	0.0356071	0.69142	-3.54841
Zfp641	-0.955248	-0.769298	-2.32796	0.0356655	0.69142	-3.54972
Gm31333	-0.588121	1.43584	-2.32726	0.0357131	0.69142	-3.55079
Ptgr1	-0.53975	1.2895	-2.3263	0.035778	0.69142	-3.55224
Ddx18	0.206064	4.09224	2.32589	0.0358053	0.69142	-3.55285
Ptprg	0.311506	4.54234	2.32581	0.0358112	0.69142	-3.55298
Chrna4	-1.67608	-0.484256	-2.32496	0.0358689	0.69142	-3.55427
Ssmem1	-1.23146	-3.74174	-2.32472	0.0358848	0.69142	-3.55463
Stx3	-0.223668	3.07191	-2.32462	0.0358918	0.69142	-3.55478
F2	0.191762	10.7766	2.32444	0.0359037	0.69142	-3.55504
F13b	0.40065	7.52551	2.32385	0.0359441	0.69142	-3.55594
Dpy19l1	-0.323933	5.3907	-2.32363	0.0359591	0.69142	-3.55628
Slc22a22	1.42626	-3.47024	2.3223	0.0360495	0.69142	-3.55828
Pdpr	0.515417	3.75145	2.32225	0.0360529	0.69142	-3.55836
ATP6	0.706335	12.5739	2.32224	0.0360536	0.69142	-3.55838
H1f6	-0.904742	-3.83122	-2.32072	0.0361575	0.69142	-3.56068
Cdh15	-1.10176	-2.21849	-2.32035	0.0361833	0.69142	-3.56125
Ism2	1.42904	-3.20395	2.31998	0.0362081	0.69142	-3.56179
Car8	0.321463	6.12948	2.31941	0.0362472	0.69142	-3.56266
Tspyl2	-0.566677	3.39792	-2.31812	0.0363361	0.69142	-3.56462
Spc25	-0.438734	2.51211	-2.31804	0.0363417	0.69142	-3.56474
Aqp6	1.12894	-3.58333	2.31696	0.0364159	0.69142	-3.56637
Comtd1	-0.584784	1.35876	-2.31609	0.0364757	0.69142	-3.56768
Zfp862-ps	0.632996	2.41009	2.31601	0.0364815	0.69142	-3.56781
Mtmr7	-0.517817	1.11501	-2.31582	0.0364942	0.69142	-3.56808
Trappc2	-0.290065	2.22924	-2.31465	0.0365752	0.69142	-3.56986
Amy1	0.347755	7.58557	2.31356	0.0366509	0.69142	-3.57151
2021-09-09	-0.370261	5.78311	-2.31344	0.0366587	0.69142	-3.57168
Ttc39b	0.335658	4.7545	2.31329	0.0366697	0.69142	-3.57192
Ces1b	0.34286	6.41981	2.31151	0.036793	0.69142	-3.5746
Rab3a	-0.335495	2.12597	-2.31143	0.0367986	0.69142	-3.57472
Sh3bp1	0.879691	0.809318	2.31087	0.0368377	0.69142	-3.57557
Ncl	0.218717	7.31845	2.31002	0.0368965	0.69142	-3.57684
Gabarapl2	-0.251277	5.63411	-2.3095	0.0369327	0.69142	-3.57763
Pqbp1	-0.328538	4.92858	-2.30926	0.0369497	0.69142	-3.578
Gm17634	-0.519803	1.24377	-2.30914	0.0369581	0.69142	-3.57818
Pnpla8	0.255115	6.34812	2.30873	0.0369869	0.69142	-3.5788
Kl	1.1417	-1.18844	2.30865	0.0369922	0.69142	-3.57891
Gm30505	0.565761	1.79364	2.30777	0.0370538	0.69142	-3.58024
Rad54l	-0.540919	0.87856	-2.3077	0.0370589	0.69142	-3.58035
Rab29	-0.320319	3.10631	-2.30739	0.0370807	0.69142	-3.58082
Abca2	-0.419036	5.90278	-2.30716	0.0370964	0.69142	-3.58116
Caml	-0.248495	3.99529	-2.30698	0.0371094	0.69142	-3.58144
Lef1	1.14688	-2.46277	2.30681	0.0371214	0.69142	-3.5817
Atrnl1	0.261258	4.66159	2.30636	0.0371529	0.69142	-3.58237
Prkd1	-1.23856	-3.47322	-2.30597	0.0371802	0.69142	-3.58296
Eif5a2	1.21552	-1.65261	2.30586	0.0371877	0.69142	-3.58312
Ticam1	-0.428818	4.2916	-2.30495	0.0372518	0.69142	-3.5845
Cadps2	0.322844	3.73471	2.30482	0.0372613	0.69142	-3.5847
Mpp6	-0.226461	5.76558	-2.30481	0.0372615	0.69142	-3.58471
Ptgds	-1.67256	0.751835	-2.30457	0.0372786	0.69142	-3.58507
Cyp4f15	0.255636	7.58569	2.30425	0.0373015	0.69142	-3.58556
Leprotl1	-0.34094	4.08483	-2.30419	0.0373052	0.69142	-3.58564
Serpina1d	0.222126	11.8597	2.30266	0.0374136	0.69218	-3.58796
Alas2	-0.341951	6.7838	-2.30255	0.0374212	0.69218	-3.58812
Pcsk9	-0.966764	3.40263	-2.30097	0.0375333	0.692675	-3.59051
Cntnap1	-1.06776	1.74544	-2.30053	0.0375645	0.692675	-3.59117
Pnpla1	-1.27343	-3.77701	-2.30049	0.0375669	0.692675	-3.59122
Zfp472	-0.560316	1.10878	-2.29962	0.0376288	0.692675	-3.59254
Gm4131	-1.19826	-3.75056	-2.29952	0.0376356	0.692675	-3.59268
Lpar1	-0.613252	0.342388	-2.29855	0.0377046	0.69288	-3.59415
Akr1c6	0.276289	9.66573	2.29831	0.0377218	0.69288	-3.59451
Pim3	0.53361	5.91034	2.29503	0.0379562	0.696493	-3.59946
Hacd2	-0.217765	5.92385	-2.29363	0.0380563	0.697636	-3.60156
Pcnt	0.29209	3.65106	2.29299	0.0381024	0.697788	-3.60253
Cramp1l	-0.461817	4.00041	-2.29204	0.0381706	0.698058	-3.60395
Tmem167b	0.201533	4.8738	2.29174	0.0381928	0.698058	-3.60442
P2ry1	0.586748	3.19734	2.28949	0.038355	0.70033	-3.6078
Trim15	-0.964887	-2.3134	-2.28778	0.0384792	0.700906	-3.61038
Rtl8a	-0.443972	2.36983	-2.28736	0.0385097	0.700906	-3.61101
Dtx3	-0.388168	2.08057	-2.28727	0.0385157	0.700906	-3.61113
Asap2	-0.656765	3.69648	-2.28696	0.0385384	0.700906	-3.61161
Ftl1	-0.271243	10.78	-2.28584	0.0386199	0.701697	-3.61329
Baiap2	-0.555578	5.39063	-2.28478	0.0386968	0.701917	-3.61488
Ptbp1	0.434288	6.12528	2.28463	0.0387081	0.701917	-3.61511
Zfp184	-1.61962	-3.1599	-2.28332	0.0388038	0.702962	-3.61708
Mir1948	0.429323	-3.6813	2.28235	0.0388752	0.703072	-3.61855
Fam76a	0.300381	3.61987	2.2819	0.0389077	0.703072	-3.61922
2021-03-07	0.774426	3.2287	2.28138	0.038946	0.703072	-3.62
Ctbs	0.321323	3.21327	2.28088	0.0389827	0.703072	-3.62075
Scrn3	0.246177	5.60238	2.28064	0.0390003	0.703072	-3.62111
Nup205	0.288906	3.43792	2.2793	0.0390987	0.704158	-3.62312
Gm2808	2.25192	-0.396231	2.27752	0.0392301	0.704529	-3.6258
2900026A02Rik	0.304903	6.62401	2.2772	0.0392538	0.704529	-3.62628
Fam129b	-0.511747	3.02734	-2.27696	0.0392717	0.704529	-3.62664
Rnf26	-0.212359	3.5474	-2.27696	0.039272	0.704529	-3.62665
Pex2	-0.232422	4.94497	-2.27633	0.0393185	0.704678	-3.62759
Zfp13	0.578121	-0.363438	2.27361	0.0395204	0.704678	-3.63168
Mlst8	-0.272873	3.41264	-2.27335	0.0395392	0.704678	-3.63206
Slc22a23	0.327439	6.74239	2.27334	0.0395401	0.704678	-3.63207
2500004C02Rik	-0.517955	0.566575	-2.27302	0.0395638	0.704678	-3.63255
Cyp2c50	0.474475	9.91088	2.27291	0.0395725	0.704678	-3.63273
Coprs	-0.349662	0.96497	-2.27252	0.0396014	0.704678	-3.63331
Pigz	-1.0839	-2.29468	-2.2719	0.0396479	0.704678	-3.63425
H2bc9	-0.715825	-1.04719	-2.2716	0.0396701	0.704678	-3.63469
LOC115487640	-1.55482	-2.62526	-2.27122	0.0396984	0.704678	-3.63526
Ccdc160	0.952293	-2.1085	2.27067	0.0397397	0.704678	-3.63609
Sh3rf2	1.28088	-3.4613	2.27064	0.039742	0.704678	-3.63614
Actc1	-1.33454	-3.65051	-2.26879	0.0398806	0.704678	-3.63891
Als2cl	-0.291729	5.94438	-2.26817	0.0399268	0.704678	-3.63983
Slc51b	-0.984431	-0.139921	-2.26774	0.0399594	0.704678	-3.64048
Lsr	-0.306198	6.70063	-2.26746	0.0399804	0.704678	-3.6409
Sppl2b	-0.46477	3.05275	-2.26599	0.0400911	0.704678	-3.64311
Zfp882	0.642419	0.448082	2.26595	0.0400937	0.704678	-3.64316
Eif4ebp1	-0.387056	5.11328	-2.26578	0.0401069	0.704678	-3.64342
Ccl27a	-0.419792	2.50063	-2.26573	0.0401109	0.704678	-3.6435
Zfp457	-1.16818	-2.19944	-2.26545	0.0401319	0.704678	-3.64392
Pgd	-0.325864	4.9774	-2.26534	0.0401399	0.704678	-3.64408
Dip2c	0.520426	3.82555	2.26507	0.0401604	0.704678	-3.64448
C430042M11Rik	-1.29567	-1.5438	-2.2636	0.040272	0.704678	-3.64669
C1d	-0.524401	4.89644	-2.26212	0.0403838	0.704678	-3.6489
Rtl8b	-0.381826	2.1279	-2.26206	0.0403883	0.704678	-3.64899
Pth1r	0.30068	3.19383	2.2612	0.0404542	0.704678	-3.65029
Fam214b	-0.230735	4.32589	-2.26062	0.0404978	0.704678	-3.65115
Sass6	0.952658	0.121391	2.25922	0.040605	0.704678	-3.65326
Slc22a19	1.04085	-3.29422	2.25918	0.0406078	0.704678	-3.65331
Ifnlr1	-1.21187	-1.90733	-2.25897	0.0406239	0.704678	-3.65363
Ddx19b	0.252979	4.59476	2.25881	0.0406356	0.704678	-3.65386
Pkp2	-0.245424	5.10245	-2.25862	0.0406505	0.704678	-3.65415
Peg10	-1.04224	0.387337	-2.25843	0.0406648	0.704678	-3.65443
Nr5a2	0.238283	5.60123	2.25822	0.0406811	0.704678	-3.65475
Smdt1	-0.37682	5.33032	-2.25668	0.0407991	0.704678	-3.65706
Nr3c2	0.426642	3.47605	2.25639	0.040821	0.704678	-3.65748
Cenpb	-1.39528	6.07058	-2.25624	0.0408325	0.704678	-3.65771
Cdkl5	0.643046	1.89509	2.25585	0.0408626	0.704678	-3.6583
Ly6c1	0.952784	-1.10766	2.25542	0.0408959	0.704678	-3.65894
Gm13872	0.999694	-3.95768	2.25526	0.0409081	0.704678	-3.65918
Zfp119b	0.36497	1.45229	2.25495	0.040932	0.704678	-3.65965
Prc1	-1.17344	0.442017	-2.25461	0.0409577	0.704678	-3.66015
Vac14	-0.326903	4.64619	-2.25459	0.0409599	0.704678	-3.66019
Zfp367	0.31337	3.70113	2.25373	0.0410261	0.70516	-3.66148
Mapk15	-0.441126	4.33349	-2.25168	0.0411839	0.705628	-3.66453
Tfap2b	1.04778	-3.90217	2.25112	0.0412275	0.705628	-3.66537
Mrpl20	-0.348385	5.02945	-2.25045	0.0412797	0.705628	-3.66638
Pot1a	0.418752	1.95574	2.24989	0.0413225	0.705628	-3.66721
Fech	0.285412	7.03573	2.24891	0.0413986	0.705628	-3.66867
Cdh1	-0.895112	4.72152	-2.24843	0.0414361	0.705628	-3.6694
Nid2	-0.626447	2.96338	-2.24831	0.0414459	0.705628	-3.66958
Nasp	0.26102	3.84356	2.24795	0.0414734	0.705628	-3.67011
Ldlrad4	0.266677	2.69072	2.24726	0.0415274	0.705628	-3.67115
Atp5mpl	-0.274654	5.39224	-2.24722	0.0415304	0.705628	-3.6712
Adra2a	-1.0264	-3.23249	-2.24697	0.0415498	0.705628	-3.67158
Rn7sk	-1.13628	-0.593086	-2.24656	0.0415822	0.705628	-3.6722
Dcdc2b	-0.592669	0.388899	-2.24651	0.041586	0.705628	-3.67227
Hsd17b11	0.274576	7.87823	2.24645	0.0415906	0.705628	-3.67236
Tox	0.736328	2.21259	2.24599	0.0416267	0.705628	-3.67305
Spata33	-0.839248	-1.39457	-2.24379	0.041799	0.705977	-3.67634
Bag2	0.486772	0.957001	2.24373	0.0418031	0.705977	-3.67642
Dancr	-0.797565	0.595934	-2.24341	0.0418282	0.705977	-3.67689
Msto1	-0.348068	3.23231	-2.24339	0.0418303	0.705977	-3.67693
Fam160b1	0.272381	5.80446	2.24328	0.0418385	0.705977	-3.67709
Slc3a2	0.224337	5.18947	2.24232	0.0419141	0.706215	-3.67853
Zfp62	1.66698	3.32608	2.24211	0.0419305	0.706215	-3.67884
Chil1	-1.10305	-1.13983	-2.24164	0.0419674	0.706215	-3.67954
LOC115488237	0.645871	-4.16338	2.24093	0.0420238	0.706521	-3.68061
1700008J07Rik	-0.433216	1.22975	-2.23952	0.0421345	0.706904	-3.6827
Trir	-0.409313	5.45254	-2.23903	0.0421732	0.706904	-3.68343
Brk1	-0.265856	5.54359	-2.2388	0.0421919	0.706904	-3.68378
Pgap1	0.327708	3.64996	2.23826	0.0422347	0.706904	-3.68459
Arsa	0.497205	5.83158	2.23821	0.0422381	0.706904	-3.68465
Bmp2	0.738895	3.29887	2.2367	0.0423581	0.70827	-3.68691
H2afj	-0.43883	4.45319	-2.23555	0.04245	0.709165	-3.68864
Rhobtb2	0.295966	3.248	2.23499	0.0424945	0.709266	-3.68947
Tmem50b	-0.331915	2.88263	-2.23401	0.0425726	0.709336	-3.69093
Snord1c	0.481255	-4.06581	2.23397	0.0425755	0.709336	-3.69099
Gfod2	-0.566919	3.2224	-2.23257	0.0426876	0.710303	-3.69308
Tppp3	-1.4821	-2.1726	-2.23225	0.0427128	0.710303	-3.69355
Ppargc1b	0.828257	1.64775	2.23167	0.0427595	0.710303	-3.69442
Acvr1c	1.12185	-3.9446	2.23096	0.0428163	0.710303	-3.69547
F7	0.291335	6.34778	2.2303	0.0428691	0.710303	-3.69645
Reep3	0.22759	6.47996	2.23014	0.0428823	0.710303	-3.6967
Ccdc162	-0.667666	2.91101	-2.22941	0.0429411	0.710303	-3.69779
Slc5a12	1.10646	-1.79121	2.2294	0.0429414	0.710303	-3.69779
AI506816	-0.766643	1.89704	-2.22881	0.042989	0.710453	-3.69867
Tesk1	-0.275575	4.46734	-2.22756	0.0430898	0.711038	-3.70054
Lad1	-0.532823	3.06075	-2.22672	0.0431577	0.711038	-3.70179
Vcan	-1.59201	-2.81131	-2.22614	0.0432051	0.711038	-3.70266
Snora24	-1.12988	-2.02793	-2.22607	0.0432104	0.711038	-3.70276
Shc2	-1.74184	-2.47748	-2.22599	0.0432169	0.711038	-3.70288
Supv3l1	0.292924	3.97045	2.22527	0.0432755	0.711041	-3.70396
Mia2	0.320656	8.15925	2.22504	0.0432941	0.711041	-3.7043
Mbnl1	-1.26371	4.94515	-2.2243	0.0433538	0.711083	-3.70539
Cdh16	1.5349	-0.464309	2.22406	0.0433737	0.711083	-3.70576
Rbmx2	0.449314	0.00238631	2.22319	0.0434444	0.711115	-3.70705
Cmpk2	-0.410863	3.26619	-2.22287	0.04347	0.711115	-3.70752
4833417C18Rik	-1.53445	-2.67249	-2.22261	0.0434912	0.711115	-3.70791
Zmym6	0.38262	2.84703	2.22193	0.0435465	0.711387	-3.70892
Atp8a1	0.543283	1.85146	2.22132	0.0435968	0.71158	-3.70984
Actl6a	0.242853	3.95721	2.22055	0.0436597	0.711602	-3.71098
Dlst	0.522519	6.53893	2.22036	0.0436753	0.711602	-3.71127
Hnrnpk	0.235585	6.88423	2.21827	0.0438459	0.713531	-3.71437
B3gat3	-0.446645	5.38074	-2.21755	0.0439055	0.713531	-3.71545
Zcchc17	-0.409744	3.70883	-2.21657	0.043986	0.713531	-3.7169
Pik3c3	0.243711	4.3022	2.2155	0.0440736	0.713531	-3.71848
Kif13a	0.381739	4.0791	2.21544	0.0440784	0.713531	-3.71857
Tnk2	-0.569695	4.20797	-2.21509	0.0441079	0.713531	-3.7191
Matr3	0.344078	5.17095	2.21486	0.0441264	0.713531	-3.71943
Lzts2	-0.278228	3.23941	-2.21457	0.0441506	0.713531	-3.71987
Pccb	0.251842	7.51431	2.21403	0.0441953	0.713531	-3.72067
Gng10	-0.393761	1.99373	-2.21378	0.044216	0.713531	-3.72105
Dnase1	0.464484	1.31797	2.21374	0.0442188	0.713531	-3.7211
Fam83d	-1.49404	-2.24853	-2.21309	0.0442732	0.71372	-3.72207
Urm1	-0.286212	3.05879	-2.21267	0.0443079	0.71372	-3.7227
Vmo1	-0.670537	1.42056	-2.21018	0.0445145	0.716423	-3.72639
Gatd1	-0.568123	3.36556	-2.20948	0.0445728	0.716719	-3.72743
Mreg	-0.329074	5.04291	-2.20903	0.0446105	0.716719	-3.7281
Pnpla6	-0.284776	5.21799	-2.20704	0.0447761	0.718213	-3.73105
Ipo5	0.199404	5.47219	2.20698	0.0447813	0.718213	-3.73114
Elob	-0.445008	5.18587	-2.20385	0.045044	0.721143	-3.73578
Nmb	-1.02828	-0.990793	-2.20258	0.045151	0.721143	-3.73767
Tatdn1	-0.310584	2.77199	-2.20242	0.0451641	0.721143	-3.7379
Styk1	-1.12649	-2.96445	-2.20207	0.0451937	0.721143	-3.73842
Acox2	0.269996	8.04607	2.20163	0.0452309	0.721143	-3.73907
Cd4	-0.730136	1.10928	-2.20141	0.0452501	0.721143	-3.73941
Hdgfl3	0.44108	0.783506	2.20135	0.0452552	0.721143	-3.7395
Yy2	-2.10814	-1.312	-2.20097	0.0452869	0.721143	-3.74006
Mef2a	0.22982	4.79626	2.20063	0.0453156	0.721143	-3.74056
Pcdh12	0.875285	2.43129	2.19956	0.0454068	0.721847	-3.74215
Brms1l	-0.28832	2.34022	-2.19895	0.0454585	0.721847	-3.74306
Gm9920	-0.936164	-1.59909	-2.19844	0.0455013	0.721847	-3.74381
Pptc7	0.275304	4.16631	2.198	0.045539	0.721847	-3.74446
Olfr543	1.0057	-3.89325	2.19781	0.0455554	0.721847	-3.74475
Clip2	-0.549515	2.04613	-2.19639	0.0456761	0.722778	-3.74685
Fam25c	-0.792005	3.70395	-2.1962	0.0456924	0.722778	-3.74713
Psmd7	-0.168692	6.20232	-2.19428	0.0458563	0.724749	-3.74997
C3	0.370139	12.8736	2.19333	0.0459378	0.725386	-3.75138
Zfp493	0.337292	0.552226	2.19289	0.0459752	0.725386	-3.75203
Sipa1l2	0.66126	2.45314	2.19211	0.046042	0.72582	-3.75318
Samd1	-0.409081	3.6034	-2.19126	0.0461155	0.726358	-3.75445
Cyyr1	0.637936	1.76719	2.1904	0.0461894	0.726806	-3.75572
Tpx2	-1.22795	-0.102979	-2.19001	0.0462226	0.726806	-3.75629
Traf2	-0.260305	3.71184	-2.18796	0.0464002	0.728021	-3.75933
Lama5	0.365256	2.09108	2.18734	0.0464536	0.728021	-3.76024
Rnf135	-0.348258	3.44206	-2.18652	0.0465246	0.728021	-3.76146
Ildr2	1.24286	4.89348	2.18632	0.0465417	0.728021	-3.76175
Khdrbs3	0.274304	4.42089	2.18608	0.0465624	0.728021	-3.7621
Il4i1	0.880417	-1.45667	2.18563	0.0466018	0.728021	-3.76277
Cnbd2	-0.734665	1.89516	-2.18529	0.0466315	0.728021	-3.76328
Gatm	0.667613	2.9108	2.18482	0.0466725	0.728021	-3.76397
S100a11	-0.84591	3.0788	-2.18479	0.0466746	0.728021	-3.76401
Gna12	0.261845	7.38288	2.18432	0.0467155	0.728021	-3.7647
Wrn	0.247446	3.08716	2.1833	0.0468046	0.728021	-3.76621
Ngef	0.459652	4.65773	2.18296	0.0468345	0.728021	-3.76672
Adora3	0.851199	-3.10537	2.18262	0.0468638	0.728021	-3.76722
1700123O20Rik	-0.501008	4.07028	-2.18251	0.0468736	0.728021	-3.76738
Mettl1	-0.441245	3.0128	-2.18147	0.0469643	0.728021	-3.76892
Slc25a2	0.984611	-2.72175	2.18075	0.0470273	0.728021	-3.76998
Slc26a2	0.478781	1.96828	2.17945	0.0471416	0.728021	-3.7719
Naip1	0.879857	-0.699523	2.17923	0.0471605	0.728021	-3.77222
Amd2	0.504195	0.200184	2.17904	0.0471769	0.728021	-3.7725
Wdhd1	0.499285	0.536532	2.17811	0.0472588	0.728021	-3.77387
Lrrc8d	-1.50755	3.27925	-2.17809	0.0472611	0.728021	-3.77391
Glcci1	-1.03448	2.18223	-2.17797	0.0472719	0.728021	-3.77409
Brip1os	0.2358	4.38663	2.17764	0.0473008	0.728021	-3.77458
Phospho1	-0.954252	3.42484	-2.17695	0.0473616	0.728021	-3.77559
Srsf10	-0.210451	4.32171	-2.176	0.047445	0.728021	-3.77699
Kif22	-0.846478	-0.262845	-2.1751	0.0475244	0.728021	-3.77832
Hgf	0.899067	2.07169	2.17484	0.0475476	0.728021	-3.7787
Gns	0.204146	7.13664	2.17449	0.0475783	0.728021	-3.77921
Dhrs3	-0.41259	6.85728	-2.17436	0.0475903	0.728021	-3.77941
A3galt2	-1.2061	-3.91101	-2.1736	0.0476572	0.728021	-3.78053
Eif4b	0.250546	8.17611	2.17317	0.0476955	0.728021	-3.78116
Gprin3	0.507317	3.56429	2.17272	0.0477353	0.728021	-3.78183
Aen	-0.334448	4.08572	-2.17216	0.0477855	0.728021	-3.78266
Mrm1	-0.280779	1.88074	-2.17216	0.0477858	0.728021	-3.78266
Chsy3	0.478814	1.94442	2.1716	0.0478354	0.728021	-3.78349
Rundc3a	-0.429334	2.8439	-2.17158	0.0478371	0.728021	-3.78351
Dnaja3	0.233281	6.43112	2.17111	0.047879	0.728021	-3.78421
Zfp229	0.254187	2.21388	2.17013	0.0479665	0.728021	-3.78566
Cxcl14	-1.13311	0.41601	-2.16997	0.0479803	0.728021	-3.78588
Nebl	-1.27764	-1.7695	-2.16937	0.0480343	0.728021	-3.78677
Fam118b	-0.391047	2.39595	-2.16896	0.0480707	0.728021	-3.78737
Gdpd3	-0.87172	-1.40846	-2.16864	0.0480992	0.728021	-3.78784
Gspt2	-0.920078	-1.34987	-2.16834	0.0481264	0.728021	-3.78829
Mup20	-0.791192	11.6586	-2.16542	0.0483879	0.728021	-3.79258
Mcm10	0.57883	5.97311	2.16531	0.0483977	0.728021	-3.79274
Cyp3a13	0.29029	7.28781	2.1651	0.0484169	0.728021	-3.79306
Pcna	0.283821	4.45906	2.16495	0.0484305	0.728021	-3.79328
Tnnc1	-1.29515	-0.71526	-2.16446	0.0484747	0.728021	-3.79401
Timm21	0.21733	3.70635	2.16361	0.048551	0.728021	-3.79525
Acy1	0.307906	4.72976	2.16268	0.0486355	0.728021	-3.79663
Rpl21	-0.370243	5.2018	-2.16259	0.0486436	0.728021	-3.79676
Knstrn	-1.07803	-0.0991748	-2.1614	0.0487509	0.728021	-3.79851
Abca13	1.10111	-3.15008	2.16073	0.0488114	0.728021	-3.79949
Slc31a1	0.175787	7.66143	2.16071	0.0488138	0.728021	-3.79953
Banp	-0.921203	3.1503	-2.16068	0.0488162	0.728021	-3.79956
Chst1	-1.61459	-3.05262	-2.16029	0.0488516	0.728021	-3.80014
Grrp1	-1.31596	-3.40094	-2.15961	0.0489132	0.728021	-3.80114
Phldb3	-0.438501	2.98494	-2.15913	0.0489573	0.728021	-3.80185
BC037704	-0.671535	-1.45271	-2.15878	0.0489891	0.728021	-3.80237
Atp8b5	-0.776209	-0.56638	-2.15789	0.0490696	0.728021	-3.80367
Zbtb10	0.507077	1.92047	2.15669	0.0491794	0.728021	-3.80544
Fam171b	1.05263	0.304136	2.15599	0.0492431	0.728021	-3.80646
LOC115487557	-0.853529	-3.34982	-2.15575	0.0492654	0.728021	-3.80682
Ptpn18	-0.419867	0.0840255	-2.15569	0.0492706	0.728021	-3.8069
Psen2	-0.340788	7.26933	-2.15524	0.0493118	0.728021	-3.80756
St3gal3	-0.317405	5.94456	-2.15507	0.0493278	0.728021	-3.80782
Paqr9	-0.469165	8.38008	-2.15474	0.0493576	0.728021	-3.8083
Ctsh	0.342776	7.67778	2.15432	0.0493964	0.728021	-3.80892
Cryab	-0.367035	1.19518	-2.15401	0.049425	0.728021	-3.80938
Plpp3	0.389284	7.4218	2.15352	0.0494702	0.728021	-3.8101
Prr16	0.244843	5.06141	2.15265	0.0495496	0.728021	-3.81137
Elovl1	-0.352801	5.11593	-2.15238	0.0495744	0.728021	-3.81177
Col11a2	-0.781267	-0.310675	-2.15237	0.0495755	0.728021	-3.81178
Zfp784	1.1245	-3.51516	2.15137	0.0496677	0.728021	-3.81326
Hspbp1	-0.31562	3.76853	-2.1512	0.0496832	0.728021	-3.8135
Mir6943	0.375137	-4.19302	2.15053	0.0497452	0.728021	-3.81449
Gm128	0.745341	-4.07926	2.14868	0.0499162	0.728021	-3.81721
1500004A13Rik	-0.378708	2.56062	-2.14837	0.049945	0.728021	-3.81766
Cstb	-0.264585	4.67497	-2.1476	0.0500163	0.728021	-3.81879
Mmp17	-0.867363	-1.02436	-2.14756	0.0500203	0.728021	-3.81885
Phf20	0.281023	2.85231	2.14753	0.0500231	0.728021	-3.8189
Rab1b	-0.183708	6.53425	-2.14697	0.0500743	0.728021	-3.81971
Retreg1	0.53769	5.41259	2.14696	0.0500757	0.728021	-3.81973
Fancd2	-1.14778	-2.03532	-2.14688	0.050083	0.728021	-3.81985
Hnrnpll	0.215682	4.31055	2.14665	0.050104	0.728021	-3.82018
Micu3	0.957359	-0.181271	2.14636	0.0501311	0.728021	-3.8206
Nr2c2	0.854614	3.27299	2.14623	0.0501432	0.728021	-3.8208
Tprgl	-0.235751	5.6072	-2.14605	0.0501599	0.728021	-3.82106
Cdca5	-1.55479	-2.22833	-2.1455	0.0502114	0.728021	-3.82187
Gpr155	0.384187	4.41797	2.14542	0.0502187	0.728021	-3.82199
Lrrc58	-0.19169	5.73824	-2.14484	0.0502733	0.728021	-3.82284
Olfm2	-0.930108	-1.14613	-2.1447	0.0502858	0.728021	-3.82304
Ube2c	-1.24621	-0.428131	-2.1441	0.0503421	0.728021	-3.82393
Mir7002	-0.24808	-4.35633	-2.14331	0.0504161	0.728021	-3.82509
Parp16	-0.312101	4.17543	-2.14315	0.050431	0.728021	-3.82532
Dot1l	-0.324379	5.08211	-2.14294	0.0504504	0.728021	-3.82563
Cmtm6	-0.249703	6.26706	-2.14283	0.0504605	0.728021	-3.82579
Crybb3	-1.53906	-1.70661	-2.14077	0.0506534	0.728021	-3.8288
Acat3	-0.274975	8.27561	-2.13912	0.0508085	0.728021	-3.83122
Slc35f2	-0.799249	0.543397	-2.13891	0.0508281	0.728021	-3.83153
Soat2	0.22584	5.68974	2.13796	0.0509182	0.728021	-3.83293
Map1s	-0.301981	2.13939	-2.13759	0.0509529	0.728021	-3.83347
Vcpkmt	-0.474227	0.785298	-2.13686	0.0510217	0.728021	-3.83453
Hdac5	-0.319829	5.58453	-2.13685	0.0510233	0.728021	-3.83456
2210418O10Rik	-1.09634	2.0422	-2.13684	0.0510238	0.728021	-3.83456
Slc13a1	1.22577	-0.778256	2.13618	0.0510858	0.728021	-3.83552
Mllt1	-0.186405	4.39807	-2.13576	0.0511262	0.728021	-3.83615
Sap25	-0.503194	-0.0415363	-2.13565	0.0511368	0.728021	-3.83631
LOC115486069	-0.824584	-2.28061	-2.13533	0.051167	0.728021	-3.83678
Wdr54	-0.42408	1.98828	-2.13505	0.0511932	0.728021	-3.83718
Atat1	-0.387076	4.63491	-2.1348	0.0512169	0.728021	-3.83755
Bet1l	-0.372623	4.40199	-2.13337	0.0513525	0.728021	-3.83964
1700030C10Rik	-1.0124	-0.159148	-2.13265	0.051421	0.728021	-3.84069
A630001G21Rik	-0.540658	-0.0659335	-2.13245	0.0514405	0.728021	-3.84099
Dhx32	-0.291166	4.88268	-2.13154	0.0515272	0.728021	-3.84232
Hbb-b1	-0.332587	7.27395	-2.13151	0.0515294	0.728021	-3.84236
Fam217b	0.648951	-0.54851	2.13115	0.0515643	0.728021	-3.84289
B3galnt2	0.676908	3.59056	2.12979	0.0516945	0.728021	-3.84489
Mtss1	0.634605	7.00452	2.1295	0.051722	0.728021	-3.84531
Serpina6	0.61909	7.59631	2.12742	0.0519218	0.728021	-3.84835
Ubr1	0.275413	3.9852	2.12714	0.0519483	0.728021	-3.84876
Itk	-0.728344	-0.394905	-2.12689	0.0519727	0.728021	-3.84913
Fyttd1	0.620006	3.59491	2.12677	0.051984	0.728021	-3.8493
9430037G07Rik	-0.98663	1.02029	-2.1257	0.0520872	0.728021	-3.85087
Slc4a5	1.15661	-2.88619	2.12551	0.0521053	0.728021	-3.85114
Nfia	-0.798096	4.52985	-2.12491	0.0521634	0.728021	-3.85202
Fam228b	-0.80619	-0.642748	-2.12462	0.0521911	0.728021	-3.85244
Mfap4	-1.0495	-0.058053	-2.12461	0.0521921	0.728021	-3.85246
Kcng2	1.24766	-3.63216	2.12416	0.0522352	0.728021	-3.85311
Prps1	0.196716	4.38431	2.12368	0.052282	0.728021	-3.85382
Hdac2	0.169404	4.27718	2.12313	0.0523347	0.728021	-3.85461
H4c1	-0.503111	-3.72729	-2.12254	0.052392	0.728021	-3.85548
Grb14	-0.286765	5.77033	-2.12237	0.0524085	0.728021	-3.85572
Rpusd1	-0.252233	1.19996	-2.1222	0.0524255	0.728021	-3.85598
Pcbd1	-0.281956	7.63562	-2.12198	0.0524465	0.728021	-3.8563
Polg	0.200759	5.31085	2.12186	0.0524582	0.728021	-3.85647
Tspan10	-0.942662	-3.89229	-2.12167	0.0524763	0.728021	-3.85675
Pla2g12a	0.644796	3.99164	2.12017	0.0526224	0.728021	-3.85894
AA792892	-0.926042	-4.1548	-2.11953	0.0526846	0.728021	-3.85987
Hsd11b1	0.43012	8.87715	2.11909	0.0527271	0.728021	-3.86051
Jpt1	-0.4119	3.19554	-2.11892	0.0527439	0.728021	-3.86076
Hoxa7	0.937573	-4.15096	2.11817	0.0528171	0.728021	-3.86186
Gm30906	-1.02138	-0.758824	-2.11809	0.0528243	0.728021	-3.86196
Klhl2	0.228154	4.81532	2.11781	0.0528525	0.728021	-3.86239
Efcab9	-0.907324	-3.99534	-2.11749	0.0528837	0.728021	-3.86285
Nudt4	-0.185592	7.28243	-2.11705	0.0529263	0.728021	-3.86349
Ids	0.302244	3.75146	2.1161	0.0530196	0.728021	-3.86488
Pitpnc1	0.453023	4.19258	2.11608	0.0530208	0.728021	-3.8649
H2-K2	-0.573682	3.09032	-2.1153	0.0530975	0.728021	-3.86604
Cdc45	-0.48118	0.529153	-2.11514	0.0531137	0.728021	-3.86628
Commd6	-0.43495	4.09715	-2.11416	0.0532096	0.728021	-3.8677
Rnase2a	-1.0787	-4.10392	-2.11373	0.0532515	0.728021	-3.86832
Il21r	-0.80337	-0.539852	-2.11329	0.0532951	0.728021	-3.86897
Cyp4f40	1.02201	-3.05581	2.11308	0.0533157	0.728021	-3.86927
Cd96	-1.01174	-2.65956	-2.11281	0.0533426	0.728021	-3.86967
Alg6	0.622334	1.9395	2.11235	0.0533876	0.728021	-3.87034
Gart	0.206528	4.80102	2.11185	0.0534375	0.728021	-3.87108
H4c3	-1.0783	-1.36959	-2.11153	0.0534684	0.728021	-3.87153
Pih1d2	-1.19677	-1.76231	-2.11093	0.0535275	0.728021	-3.87241
Cacng1	-1.43786	-3.58496	-2.11059	0.0535618	0.728021	-3.87291
Ripk2	0.284219	2.81136	2.11006	0.0536137	0.728021	-3.87367
Gm15706	-0.737298	-0.699263	-2.11005	0.0536147	0.728021	-3.87369
Aptx	0.300285	3.52228	2.10986	0.0536333	0.728021	-3.87396
Lta	-1.1826	-3.34189	-2.1097	0.0536499	0.728021	-3.87421
Ugcg	0.291651	4.32342	2.10958	0.0536609	0.728021	-3.87437
1700120C14Rik	-1.26989	-2.4207	-2.10928	0.0536916	0.728021	-3.87482
Mapk8ip2	-0.774161	-4.20543	-2.10897	0.0537218	0.728021	-3.87526
Slc36a3os	0.751129	-4.21311	2.10879	0.0537392	0.728021	-3.87552
Ibsp	-0.744511	-4.21531	-2.10825	0.0537931	0.728021	-3.87631
Dhtkd1	0.451289	5.7224	2.10775	0.0538431	0.728021	-3.87704
Hipk2	0.506005	4.70565	2.1076	0.0538574	0.728021	-3.87725
Sec14l5	-1.04942	-4.11368	-2.10746	0.0538714	0.728021	-3.87746
Calu	0.329448	6.22566	2.10742	0.0538761	0.728021	-3.87753
Ddx19a	0.254672	4.51383	2.10709	0.0539089	0.728021	-3.87801
BC024139	0.326141	3.17383	2.10702	0.0539159	0.728021	-3.87811
Tnfrsf4	-0.603442	-1.36804	-2.10666	0.0539511	0.728021	-3.87862
Gm20743	-0.887756	-4.16757	-2.10626	0.0539914	0.728021	-3.87921
Elane	-0.916883	-0.923881	-2.10566	0.0540505	0.728021	-3.88008
Atox1	-0.371694	6.20624	-2.10474	0.0541426	0.728021	-3.88142
Gm19522	-0.454334	0.757989	-2.10473	0.0541435	0.728021	-3.88143
Gramd4	-0.297911	2.83477	-2.10461	0.0541561	0.728021	-3.88162
Crisp2	0.725975	-4.22149	2.1046	0.0541564	0.728021	-3.88162
Slc5a8	1.47088	-1.77558	2.10453	0.0541635	0.728021	-3.88172
Rem2	-1.03753	-3.78868	-2.10391	0.054226	0.728021	-3.88263
Dock5	0.195436	4.62369	2.1036	0.0542572	0.728021	-3.88309
Bend7	0.371581	3.33434	2.10272	0.0543446	0.728021	-3.88436
Grin2c	-0.709891	-4.22685	-2.1015	0.0544668	0.728021	-3.88613
Smg8	0.225699	3.50588	2.10075	0.0545429	0.728021	-3.88723
Nup155	0.213147	4.06948	2.10064	0.0545534	0.728021	-3.88738
Mki67	-0.788748	1.94392	-2.10057	0.0545608	0.728021	-3.88749
Prr22	-0.801033	-1.05013	-2.10041	0.0545772	0.728021	-3.88773
Txnrd3	0.305917	2.79517	2.10034	0.0545834	0.728021	-3.88781
4932438H23Rik	0.728864	-4.22053	2.09979	0.054639	0.728021	-3.88862
Col13a1	0.856461	1.75123	2.09954	0.0546646	0.728021	-3.88899
Mir7081	0.321719	-4.24355	2.09927	0.0546915	0.728021	-3.88937
Sox13	-0.32794	2.99032	-2.09894	0.0547247	0.728021	-3.88985
Fgf15	1.09612	-3.84484	2.09891	0.0547278	0.728021	-3.8899
Tfpi2	-0.238637	5.36648	-2.09877	0.0547418	0.728021	-3.8901
Nup210	0.363699	3.9275	2.09871	0.0547481	0.728021	-3.89019
Clptm1	0.391028	6.25333	2.09863	0.0547565	0.728021	-3.89031
Tox2	-1.13504	-1.64168	-2.09822	0.0547972	0.728021	-3.8909
Mir7022	-0.673666	-3.92741	-2.09819	0.0548007	0.728021	-3.89095
Ifitm7	0.848497	-4.18065	2.09804	0.0548154	0.728021	-3.89116
Saysd1	-0.392602	3.12398	-2.09751	0.0548697	0.728021	-3.89194
Il11	0.85264	-4.17927	2.09675	0.0549457	0.728021	-3.89303
Gadl1	-0.659352	-4.2437	-2.09584	0.0550386	0.728021	-3.89436
Gm6583	0.878586	-3.81036	2.09538	0.0550854	0.728021	-3.89503
Rttn	0.435599	0.271787	2.09498	0.0551252	0.728021	-3.8956
Palld	-0.350133	6.18601	-2.09361	0.0552653	0.728021	-3.8976
Cfhr2	0.294664	8.00295	2.09121	0.0555101	0.728021	-3.90109
Depdc5	0.246081	3.68652	2.09109	0.0555221	0.728021	-3.90126
Gdpd1	-0.394484	-0.103084	-2.08959	0.0556752	0.728021	-3.90343
Eif1b	-0.287583	3.7732	-2.08901	0.0557345	0.728021	-3.90427
Spata24	-0.670544	0.407329	-2.08859	0.0557781	0.728021	-3.90488
Pcolce2	0.742227	0.534953	2.08835	0.0558031	0.728021	-3.90523
Pip5k1a	0.38584	3.43264	2.08738	0.0559017	0.728021	-3.90663
G630016G05Rik	0.581642	-4.2696	2.08594	0.0560505	0.728021	-3.90872
Man2b1	0.213734	6.53202	2.08588	0.0560564	0.728021	-3.9088
Mapkap1	0.381993	5.07404	2.08586	0.0560585	0.728021	-3.90883
Tnfsf9	-1.30914	-3.86006	-2.08544	0.056102	0.728021	-3.90944
Gm11532	0.884476	-4.16866	2.08536	0.0561102	0.728021	-3.90956
Tmem95	-0.675502	-4.23832	-2.08507	0.0561408	0.728021	-3.90999
Bicdl1	-0.410027	1.31962	-2.08418	0.056232	0.728021	-3.91126
Rab3b	1.33841	-1.81892	2.08281	0.0563745	0.728021	-3.91326
Tmsb10	-0.376414	3.94515	-2.08275	0.05638	0.728021	-3.91334
Ttk	-1.97703	-2.90923	-2.08259	0.0563974	0.728021	-3.91358
Pik3cb	0.791143	3.49671	2.08255	0.0564014	0.728021	-3.91363
Nhs	-0.708778	-4.22722	-2.08222	0.0564351	0.728021	-3.9141
Xaf1	-0.300486	3.10671	-2.08216	0.0564416	0.728021	-3.91419
Nudt9	-0.180323	5.5289	-2.08205	0.0564528	0.728021	-3.91435
Dand5	-0.435676	1.93961	-2.08183	0.0564754	0.728021	-3.91467
Nup160	0.246827	2.59854	2.08182	0.0564767	0.728021	-3.91468
Mir6986	-0.622018	-3.25727	-2.0818	0.0564785	0.728021	-3.91471
Acot5	-0.630827	-4.25321	-2.08174	0.0564854	0.728021	-3.91481
Chrne	-1.31962	-3.51082	-2.08172	0.0564877	0.728021	-3.91484
Ccpg1os	-0.219901	2.71322	-2.08159	0.0565005	0.728021	-3.91502
Tbc1d9b	0.209229	6.00202	2.08148	0.0565118	0.728021	-3.91517
Nepro	0.265029	2.50569	2.08131	0.05653	0.728021	-3.91543
Hmox2	-0.335341	5.13684	-2.08119	0.0565422	0.728021	-3.9156
Impg2	0.399866	1.79979	2.08116	0.0565454	0.728021	-3.91564
Snd1	0.245378	6.47161	2.08095	0.0565672	0.728021	-3.91595
Ap4e1	0.345734	2.32437	2.08001	0.0566649	0.728021	-3.9173
9330104G04Rik	-0.845789	-1.26474	-2.07977	0.0566901	0.728021	-3.91766
Akt1s1	-0.431304	5.12489	-2.07971	0.0566965	0.728021	-3.91774
Zfp637	-0.321693	3.40982	-2.07822	0.0568519	0.728021	-3.9199
Efnb3	1.51499	-2.93023	2.07756	0.0569205	0.728021	-3.92085
Cfap53	-0.549118	-4.28044	-2.07722	0.0569559	0.728021	-3.92134
Cyp8b1	-0.648245	8.6247	-2.07638	0.0570447	0.728021	-3.92256
E330032C10Rik	0.829338	-4.18704	2.07551	0.0571352	0.728021	-3.92381
Ampd2	-0.279465	4.6367	-2.07506	0.0571831	0.728021	-3.92447
Csmd2	-0.634684	-4.25192	-2.075	0.0571894	0.728021	-3.92456
Car14	0.523017	5.76389	2.07404	0.0572903	0.728021	-3.92594
Lclat1	0.334912	5.77422	2.07403	0.0572912	0.728021	-3.92596
Mdh2	-0.190095	7.68219	-2.07387	0.0573083	0.728021	-3.92619
Bax	-0.532087	3.58521	-2.0738	0.0573148	0.728021	-3.92628
Btg1	-0.346665	5.74841	-2.07373	0.0573225	0.728021	-3.92639
Ube2e1	0.353289	4.55489	2.07339	0.0573585	0.728021	-3.92688
Erf	0.380167	4.58397	2.0733	0.0573681	0.728021	-3.92701
Notch4	0.734951	1.12754	2.0733	0.0573681	0.728021	-3.92701
Trim43a	-1.1534	-2.29573	-2.07309	0.0573904	0.728021	-3.92732
Pmepa1	-0.94183	1.28933	-2.07278	0.0574223	0.728021	-3.92776
Mir6910	-0.588955	-3.61653	-2.07174	0.0575329	0.728021	-3.92927
Glmn	0.353462	1.31038	2.07147	0.0575609	0.728021	-3.92965
Acot12	0.270729	7.33734	2.07088	0.0576233	0.728021	-3.93051
Folr1	1.20383	-1.28373	2.07015	0.0577012	0.728021	-3.93157
Ccdc6	-0.20833	4.70726	-2.06941	0.0577791	0.728021	-3.93263
Vwa2	-0.513236	-4.29241	-2.0689	0.0578329	0.728021	-3.93336
Ido1	-0.513236	-4.29241	-2.0689	0.0578329	0.728021	-3.93336
Tcfl5	-0.513236	-4.29241	-2.0689	0.0578329	0.728021	-3.93336
Pou5f2	-0.513236	-4.29241	-2.0689	0.0578329	0.728021	-3.93336
Gm32921	-0.513236	-4.29241	-2.0689	0.0578329	0.728021	-3.93336
Pax1	0.513729	-4.29224	2.0689	0.0578334	0.728021	-3.93337
Gm26839	0.513729	-4.29224	2.0689	0.0578334	0.728021	-3.93337
Tmem79	-0.432639	0.713942	-2.06857	0.057868	0.728021	-3.93384
Fcrls	0.503264	-4.29573	2.0674	0.0579922	0.728021	-3.93552
Nog	0.503264	-4.29573	2.0674	0.0579922	0.728021	-3.93552
Hoxd4	0.503264	-4.29573	2.0674	0.0579922	0.728021	-3.93552
Dlgap2	0.502089	-4.29612	2.06696	0.0580392	0.728021	-3.93616
E230016K23Rik	0.502089	-4.29612	2.06696	0.0580392	0.728021	-3.93616
Sh3rf1	0.610726	1.81366	2.06661	0.0580771	0.728021	-3.93668
Gp1bb	-0.648773	-2.93473	-2.06652	0.0580868	0.728021	-3.93681
Ky	-0.508292	-4.29405	-2.06638	0.0581013	0.728021	-3.937
Fbxo27	-0.508292	-4.29405	-2.06638	0.0581013	0.728021	-3.937
Gstz1	0.243821	8.45135	2.06525	0.0582223	0.728021	-3.93864
Lix1	-0.876806	-4.04923	-2.06521	0.0582262	0.728021	-3.93869
Cdh23	-0.496415	-4.29801	-2.06511	0.0582372	0.728021	-3.93884
Prss35	-0.505673	-4.29493	-2.06489	0.0582604	0.728021	-3.93915
Exph5	0.405102	3.34675	2.06442	0.0583101	0.728021	-3.93982
Srebf2	-0.402797	5.2052	-2.06428	0.0583256	0.728021	-3.94003
0610031O16Rik	0.301709	5.1879	2.06388	0.0583682	0.728021	-3.94061
Fam89b	0.837298	1.85932	2.06372	0.0583857	0.728021	-3.94084
Cog8	-0.300124	4.44606	-2.06362	0.0583957	0.728021	-3.94098
Gstt2	0.479	6.2245	2.06336	0.0584243	0.728021	-3.94136
Gm13572	-0.523274	-4.28906	-2.06324	0.0584368	0.728021	-3.94153
Dlg1	0.359186	4.95785	2.06276	0.058488	0.728021	-3.94222
Riok2	0.249264	4.36014	2.06215	0.0585541	0.728021	-3.94311
1700123J17Rik	-0.484816	-4.30188	-2.06198	0.0585715	0.728021	-3.94334
Smagp	-0.732	4.27307	-2.06139	0.0586357	0.728021	-3.9442
Rnf24	-0.587016	3.10655	-2.06067	0.058713	0.728021	-3.94524
Arrdc1	-0.263326	1.66688	-2.06066	0.0587144	0.728021	-3.94526
Plk1	-1.09649	-0.858007	-2.06064	0.0587157	0.728021	-3.94527
Cdk1	-0.759213	0.609317	-2.06057	0.0587238	0.728021	-3.94538
Dctn5	-0.216148	4.84719	-2.0603	0.058753	0.728021	-3.94577
Slc38a4	0.41924	9.56186	2.06029	0.0587541	0.728021	-3.94579
Gm7694	-0.340642	2.72717	-2.05991	0.0587946	0.728021	-3.94633
LOC105246506	-0.725088	-0.523833	-2.05975	0.0588124	0.728021	-3.94657
Irgq	-0.298223	4.4092	-2.05958	0.0588299	0.728021	-3.9468
2021-09-01	-0.355991	1.24069	-2.05937	0.0588527	0.728021	-3.94711
1700030J22Rik	0.689468	-0.875774	2.05923	0.0588681	0.728021	-3.94731
Pm20d2	0.392501	0.543156	2.05829	0.0589692	0.728021	-3.94866
Mrpl21	-0.326857	3.95019	-2.05773	0.0590301	0.728021	-3.94947
Nat8	-0.639714	4.32783	-2.05754	0.059051	0.728021	-3.94975
Fam71f2	-1.30212	-3.316	-2.05752	0.0590533	0.728021	-3.94978
Cfap47	-0.73013	-4.10478	-2.05728	0.0590783	0.728021	-3.95011
Xdh	0.332803	7.38697	2.05598	0.0592198	0.728021	-3.952
Lbh	-0.348565	3.39665	-2.0554	0.0592831	0.728021	-3.95283
Slc43a1	0.560638	1.64822	2.05501	0.0593254	0.728021	-3.95339
Trp63	0.474208	-4.30541	2.05485	0.0593421	0.728021	-3.95362
Ccdc85a	0.474208	-4.30541	2.05485	0.0593421	0.728021	-3.95362
Rad23a	0.242453	5.04652	2.05483	0.0593444	0.728021	-3.95365
Dusp15	0.480374	-4.30336	2.05481	0.0593464	0.728021	-3.95367
Hmx2	0.473034	-4.30581	2.0548	0.0593475	0.728021	-3.95369
Pcdhgb7	1.83489	-2.93089	2.05441	0.0593899	0.728021	-3.95425
Tmem238	-0.364709	2.33359	-2.05417	0.0594158	0.728021	-3.95459
Lage3	-0.231879	3.74209	-2.05387	0.0594487	0.728021	-3.95503
Trp53i13	-0.462758	1.05166	-2.05373	0.0594643	0.728021	-3.95523
Rfwd3	0.319857	4.17416	2.0535	0.0594897	0.728021	-3.95557
Pknox2	0.529112	1.17996	2.05149	0.0597086	0.728021	-3.95845
4930523C07Rik	0.351974	3.72307	2.05135	0.0597241	0.728021	-3.95866
Car5a	0.411982	5.74493	2.05102	0.0597605	0.728021	-3.95914
Adgrg5	-0.967006	-1.79201	-2.05064	0.0598011	0.728021	-3.95967
Fpgs	-0.36576	7.49915	-2.0503	0.059839	0.728021	-3.96017
Tsix	-0.635159	-4.25176	-2.05029	0.0598393	0.728021	-3.96017
Hsd17b12	-0.384072	7.22082	-2.05026	0.0598429	0.728021	-3.96022
4930502E09Rik	-0.850563	-3.78136	-2.05023	0.0598463	0.728021	-3.96026
Gad2	0.605436	-4.26167	2.05005	0.0598658	0.728021	-3.96052
Hmces	-0.41858	2.95223	-2.04958	0.0599181	0.728021	-3.9612
Ak9	-0.587967	-4.26749	-2.04925	0.0599533	0.728021	-3.96167
Ivl	-0.851356	-4.1797	-2.04923	0.0599561	0.728021	-3.9617
H19	-1.60199	-2.12429	-2.04906	0.0599744	0.728021	-3.96194
Rag1	-0.460613	-4.30995	-2.0484	0.0600471	0.728021	-3.96289
Rfx6	-0.457993	-4.31082	-2.04836	0.0600511	0.728021	-3.96295
Lhb	-0.457993	-4.31082	-2.04836	0.0600511	0.728021	-3.96295
1700084J12Rik	-0.465556	-4.3083	-2.04821	0.0600678	0.728021	-3.96316
LOC115490051	-0.591909	-4.26618	-2.04719	0.0601805	0.728021	-3.96464
Smim40	-0.86632	-4.17471	-2.04709	0.0601911	0.728021	-3.96478
Dnmt3b	-0.774103	1.53394	-2.04582	0.0603313	0.728021	-3.9666
Tesc	-1.42229	-3.18331	-2.04572	0.0603425	0.728021	-3.96675
Gpx6	0.765473	-0.610043	2.04571	0.0603434	0.728021	-3.96676
Pjvk	-0.481469	-4.30299	-2.04556	0.0603595	0.728021	-3.96697
Wdr59	0.400945	3.62398	2.04483	0.0604403	0.728021	-3.96802
Med24	-0.260822	4.05813	-2.04458	0.0604688	0.728021	-3.96839
Il1rap	0.248005	7.28247	2.04417	0.0605135	0.728021	-3.96897
Olfr1366	-0.862379	-4.17602	-2.04327	0.0606128	0.728021	-3.97026
Rel	0.393679	2.74574	2.04277	0.0606689	0.728021	-3.97098
H2-D1	-0.226409	9.44073	-2.04271	0.0606749	0.728021	-3.97106
Pla2r1	0.864616	1.85598	2.0427	0.0606768	0.728021	-3.97109
Rad51	-0.895865	-0.882147	-2.04258	0.0606902	0.728021	-3.97126
Cdyl	0.376253	2.04024	2.04253	0.0606956	0.728021	-3.97133
Cdh2	0.360499	6.63699	2.04238	0.0607124	0.728021	-3.97155
Card14	1.05403	-3.73743	2.04225	0.0607269	0.728021	-3.97173
Grap	0.389285	1.85828	2.04199	0.060755	0.728021	-3.9721
Foxk1	0.345883	4.86892	2.0414	0.0608208	0.728021	-3.97295
Nrip1	-0.329461	3.50532	-2.04137	0.0608237	0.728021	-3.97298
Dchs2	0.65304	-4.2458	2.04115	0.0608489	0.728021	-3.97331
Srms	-0.984903	-0.65463	-2.04112	0.0608525	0.728021	-3.97335
Syngap1	-0.504513	0.846152	-2.04105	0.0608594	0.728021	-3.97344
Tubb4b	-0.381876	6.7341	-2.04104	0.0608611	0.728021	-3.97347
Cdkn2c	-0.473069	1.94435	-2.04071	0.0608975	0.728021	-3.97393
Sacm1l	0.488907	4.981	2.03964	0.0610172	0.728021	-3.97548
Usp50	-2.54127	-1.09024	-2.03958	0.061023	0.728021	-3.97555
Phtf1os	-1.89903	-1.26543	-2.03829	0.0611679	0.728021	-3.97741
Atxn7l2	0.429628	1.15267	2.03827	0.0611698	0.728021	-3.97744
Prkce	0.258622	3.73567	2.03823	0.0611748	0.728021	-3.9775
Syne4	-0.817204	-0.201521	-2.03807	0.0611926	0.728021	-3.97773
Uba2	0.210446	4.57463	2.03797	0.061203	0.728021	-3.97786
Pmm1	-0.364003	2.10009	-2.03783	0.0612193	0.728021	-3.97807
C2cd6	0.608432	-4.26067	2.03763	0.0612413	0.728021	-3.97835
Adrb1	1.33446	-1.34422	2.03669	0.0613469	0.728021	-3.9797
Hnrnpd	0.327284	5.06649	2.03645	0.0613737	0.728021	-3.98005
Mir684-2	-0.494621	-4.20904	-2.0361	0.0614133	0.728021	-3.98055
Ptges3l	0.860843	-1.35	2.03591	0.0614341	0.728021	-3.98082
Jade3	0.349983	1.67476	2.03572	0.0614553	0.728021	-3.98109
LOC115486996	0.421758	-4.3229	2.03567	0.0614613	0.728021	-3.98117
Gm40617	0.451085	-4.31312	2.03403	0.0616457	0.728021	-3.98352
Lysmd2	-1.16436	-1.84371	-2.03377	0.0616744	0.728021	-3.98388
9830107B12Rik	0.458279	-4.31072	2.03358	0.061696	0.728021	-3.98416
LOC115490527	-0.25583	-4.21591	-2.03316	0.0617437	0.728021	-3.98476
Cdk15	0.634779	-4.25189	2.03307	0.061754	0.728021	-3.98489
Cwf19l2	0.295761	3.29991	2.03287	0.061776	0.728021	-3.98517
Stx11	0.666911	-0.285988	2.03203	0.0618707	0.728021	-3.98637
Tmem216	-0.558231	1.72232	-2.0316	0.0619199	0.728021	-3.987
Dppa3	-0.833917	-4.18551	-2.03151	0.0619295	0.728021	-3.98712
Uchl5	-0.188233	3.60585	-2.03147	0.0619346	0.728021	-3.98718
Mccc1	0.308814	5.56177	2.03123	0.0619607	0.728021	-3.98751
Ier5	-0.414576	2.15146	-2.03118	0.0619665	0.728021	-3.98759
Stmn2	-1.11253	-3.81664	-2.03066	0.0620255	0.728021	-3.98833
Fkbp3	-0.171022	3.94036	-2.03056	0.0620372	0.728021	-3.98848
Map10	1.40559	-1.95415	2.03039	0.062056	0.728021	-3.98872
Gm16523	-0.447996	-4.31415	-2.03023	0.062075	0.728021	-3.98896
Zfp296	-1.07727	-0.693474	-2.02824	0.0623007	0.729536	-3.99181
Nmi	0.259531	3.65599	2.02779	0.0623514	0.729536	-3.99244
Enpp2	0.348597	6.11308	2.02761	0.0623725	0.729536	-3.99271
9130023H24Rik	-0.395769	1.85788	-2.02759	0.062374	0.729536	-3.99273
Caln1	-0.460099	2.16669	-2.02735	0.0624018	0.729536	-3.99308
Capn1	-0.210355	4.51406	-2.02686	0.0624571	0.72972	-3.99377
Nostrin	0.2895	3.81108	2.025	0.0626692	0.730796	-3.99643
Acap3	0.452757	1.64466	2.02494	0.0626762	0.730796	-3.99652
Tmem100	0.509376	-1.30375	2.02448	0.0627287	0.730796	-3.99717
Anks4b	0.237369	6.17988	2.02439	0.0627395	0.730796	-3.99731
Btnl2	0.927556	-2.22951	2.02357	0.0628326	0.730796	-3.99847
Tafa1	0.627439	-4.25434	2.02339	0.0628539	0.730796	-3.99874
Zcchc3	0.637686	-0.846431	2.02275	0.0629268	0.730796	-3.99964
Ces1a	-1.17434	-2.77596	-2.02268	0.0629348	0.730796	-3.99974
Dnttip2	0.24811	4.40528	2.02156	0.0630635	0.730796	-4.00134
Usp10	-0.260435	5.88112	-2.02153	0.0630676	0.730796	-4.00139
Trip6	-0.264476	3.95425	-2.02146	0.0630754	0.730796	-4.00149
Plekha7	0.294593	3.08194	2.0213	0.0630941	0.730796	-4.00172
Ankrd23	-0.809136	1.49784	-2.02085	0.0631458	0.730796	-4.00237
Dhrs13	-0.274502	1.75699	-2.02057	0.0631771	0.730796	-4.00275
Epb41l4b	0.220496	6.73464	2.01998	0.063246	0.730796	-4.00361
Lrrc8e	-0.978269	-1.68715	-2.01967	0.0632808	0.730796	-4.00404
Ndufs5	-0.370886	5.35882	-2.01967	0.0632816	0.730796	-4.00405
Vps33b	-0.206348	2.92603	-2.01877	0.0633848	0.730796	-4.00533
Gm35147	-0.615024	-4.25848	-2.01874	0.0633892	0.730796	-4.00538
Rbm33	-0.689329	5.49309	-2.01828	0.0634414	0.730796	-4.00603
Ptpn23	-0.211243	4.5144	-2.01818	0.0634531	0.730796	-4.00617
Ndufab1	-0.276744	5.3391	-2.01811	0.0634613	0.730796	-4.00627
Hlf	0.426325	5.17558	2.01809	0.0634634	0.730796	-4.0063
Cilp	-1.29336	-1.91129	-2.01739	0.0635447	0.730796	-4.0073
Fbxo5	-0.614771	-0.0921686	-2.01731	0.0635541	0.730796	-4.00742
Zfp646	0.36169	4.51013	2.0171	0.0635784	0.730796	-4.00772
Ankrd27	-0.180397	4.91699	-2.01645	0.0636531	0.731154	-4.00863
Eya4	0.83131	-1.51036	2.01615	0.0636888	0.731154	-4.00907
Taf5	0.305531	1.87909	2.01536	0.0637797	0.731481	-4.01019
Sprn	0.530442	0.382865	2.01522	0.0637965	0.731481	-4.0104
Gpm6b	0.525354	-0.951544	2.01293	0.0640632	0.732491	-4.01366
Cideb	-0.333436	8.28183	-2.01265	0.0640958	0.732491	-4.01406
Fam124a	-0.444557	3.64211	-2.0122	0.0641476	0.732491	-4.01469
Abat	0.375202	8.77363	2.01139	0.0642428	0.732491	-4.01586
3930402G23Rik	-1.63779	-0.373675	-2.01118	0.0642667	0.732491	-4.01615
Fndc10	-0.642432	-0.825991	-2.01049	0.0643476	0.732491	-4.01713
Chrm4	-0.855394	-4.04219	-2.01033	0.0643668	0.732491	-4.01737
Ccr1	-1.43499	-1.48566	-2.01018	0.0643844	0.732491	-4.01758
Rbp2	-1.25356	0.729847	-2.01008	0.064396	0.732491	-4.01772
Dars	0.301426	5.9978	2.00965	0.0644467	0.732491	-4.01834
Pfkl	-0.262349	5.06329	-2.00933	0.0644842	0.732491	-4.01879
Crtac1	0.430976	-4.31983	2.00876	0.0645514	0.732491	-4.01961
1110017D15Rik	-0.484624	-4.30194	-2.00866	0.0645622	0.732491	-4.01974
Apoc3	-0.329281	10.3895	-2.00827	0.0646083	0.732491	-4.0203
Kcnb2	0.43215	-4.31943	2.00823	0.0646126	0.732491	-4.02035
Itih2	0.344265	10.1579	2.00817	0.0646199	0.732491	-4.02044
Palb2	-0.553447	-0.642031	-2.00802	0.0646382	0.732491	-4.02066
Atp13a3	0.217722	6.52519	2.00744	0.0647064	0.732491	-4.02148
Etfa	0.190956	8.23569	2.0073	0.0647226	0.732491	-4.02168
Ptprf	0.330195	7.3312	2.00714	0.0647417	0.732491	-4.02191
Tmem72	1.27225	-3.10901	2.00685	0.0647752	0.732491	-4.02232
St3gal6	0.439522	1.61833	2.00672	0.0647903	0.732491	-4.0225
Gm3336	-0.355543	0.61199	-2.00662	0.0648025	0.732491	-4.02265
Smim13	0.243697	4.75512	2.00607	0.064868	0.732491	-4.02344
Hsd3b3	0.294172	7.72014	2.00578	0.0649011	0.732491	-4.02384
Scube1	-1.05124	-1.12545	-2.00566	0.0649164	0.732491	-4.02402
Dclre1c	0.448938	2.8511	2.00522	0.0649681	0.732528	-4.02464
Srr	0.279622	6.25716	2.00344	0.0651778	0.732528	-4.02716
Spa17	-0.876553	-1.23064	-2.00305	0.065225	0.732528	-4.02773
Tmem63a	0.292639	3.55503	2.00237	0.0653047	0.732528	-4.02869
Bcl7c	-0.545574	4.13891	-2.00218	0.0653274	0.732528	-4.02896
Hace1	-0.402674	1.7099	-2.00208	0.0653397	0.732528	-4.02911
Gm6614	-1.00195	-1.9155	-2.00203	0.0653456	0.732528	-4.02918
Ccdc116	1.21036	-3.30982	2.00193	0.065357	0.732528	-4.02931
Kidins220	0.905819	5.23122	2.00163	0.0653931	0.732528	-4.02974
Gnas	-0.224889	8.4681	-2.00159	0.065398	0.732528	-4.0298
Polr2m	0.256002	5.82304	2.00155	0.0654024	0.732528	-4.02986
Apoh	0.161241	10.7617	2.0013	0.0654322	0.732528	-4.03021
Actl7b	-0.641334	-4.24971	-2.00037	0.0655425	0.732528	-4.03153
1700040D17Rik	-0.641334	-4.24971	-2.00037	0.0655425	0.732528	-4.03153
Isyna1	-0.462193	2.37295	-2.00017	0.0655667	0.732528	-4.03182
Zfyve19	-0.193626	4.11585	-2.00002	0.0655848	0.732528	-4.03203
Reg4	-1.21974	-3.37332	-1.99957	0.0656386	0.732528	-4.03268
Cenpm	-1.06109	0.724409	-1.99882	0.0657279	0.732528	-4.03374
Tcf20	0.190473	4.80659	1.99848	0.0657688	0.732528	-4.03423
Slc25a16	0.23519	5.95259	1.99814	0.0658091	0.732528	-4.03471
Rasgrp3	0.616147	2.85191	1.99754	0.0658802	0.732528	-4.03555
Atm	0.471094	2.14533	1.99731	0.0659082	0.732528	-4.03588
Stau2	0.315697	2.27006	1.99701	0.0659436	0.732528	-4.0363
Spg21	-0.29326	4.42923	-1.99673	0.0659783	0.732528	-4.03671
Armh4	-1.25197	-3.26094	-1.99595	0.0660712	0.732528	-4.03781
Snupn	0.221322	2.33427	1.99591	0.0660763	0.732528	-4.03787
Hectd2os	-0.367917	5.82933	-1.99537	0.0661404	0.732528	-4.03863
Gab1	0.264357	3.63225	1.99479	0.0662107	0.732528	-4.03946
Ar	0.390835	2.82747	1.99444	0.0662529	0.732528	-4.03996
Psca	0.692395	-4.23269	1.99418	0.0662836	0.732528	-4.04032
Gcdh	0.232739	8.81512	1.99404	0.0663011	0.732528	-4.04053
Mib2	-0.218386	4.43336	-1.99395	0.0663112	0.732528	-4.04065
Phlpp2	0.354446	2.15271	1.99368	0.0663446	0.732528	-4.04104
Oxld1	-0.351117	3.22782	-1.99306	0.0664184	0.732528	-4.04191
H2-K1	-0.521771	9.05925	-1.99277	0.0664541	0.732528	-4.04233
Dido1	0.234319	5.67885	1.99273	0.0664584	0.732528	-4.04238
Tor1aip2	0.45559	5.05748	1.99265	0.0664679	0.732528	-4.04249
Dtna	-0.966992	-2.48914	-1.99178	0.0665726	0.732528	-4.04372
Hbegf	0.729469	-0.428149	1.99168	0.0665848	0.732528	-4.04387
Ppp6r3	0.173938	5.93863	1.99139	0.06662	0.732528	-4.04428
Exd2	0.409517	2.96417	1.99135	0.0666251	0.732528	-4.04434
Prkaca	-0.255137	5.87938	-1.99115	0.0666493	0.732528	-4.04462
Psph	-0.287506	1.79447	-1.991	0.0666671	0.732528	-4.04483
Lamtor1	-0.22815	5.71164	-1.99092	0.0666776	0.732528	-4.04495
1700109H08Rik	0.524355	0.115093	1.99055	0.0667224	0.732528	-4.04548
Haghl	-0.412293	1.94272	-1.99036	0.066745	0.732528	-4.04574
Clasp1	-0.311618	3.81642	-1.98963	0.0668331	0.733059	-4.04677
1810013L24Rik	0.241913	4.92756	1.98894	0.0669176	0.733117	-4.04776
Trappc12	0.227446	4.46503	1.98883	0.0669305	0.733117	-4.04791
Oas1g	-0.424075	1.2873	-1.98847	0.0669746	0.733117	-4.04843
Adra2c	0.733612	-4.21895	1.98801	0.0670299	0.733117	-4.04907
Cyp27b1	-1.086	-3.91642	-1.98771	0.0670662	0.733117	-4.0495
Sfxn3	-0.481256	0.833664	-1.98719	0.0671295	0.733117	-4.05023
Tmem101	-0.333945	2.56661	-1.98714	0.0671353	0.733117	-4.0503
Abcb4	-0.248459	8.70343	-1.98588	0.0672895	0.733117	-4.05209
Lnx2	-0.311743	4.61151	-1.98561	0.0673225	0.733117	-4.05247
Dap	-0.238165	7.68778	-1.98558	0.0673265	0.733117	-4.05252
Armc1	0.174509	4.91206	1.98525	0.0673661	0.733117	-4.05298
Zyg11b	0.283319	5.31645	1.98436	0.0674748	0.733117	-4.05424
Hif1a	0.366286	4.74113	1.98402	0.0675169	0.733117	-4.05473
Rab12	0.740316	4.22367	1.98382	0.0675412	0.733117	-4.05501
Sin3a	0.187247	4.90023	1.98361	0.0675663	0.733117	-4.0553
Rgl1	0.547531	3.8455	1.98316	0.0676217	0.733117	-4.05594
Kcng4	0.685055	-4.23513	1.98298	0.0676435	0.733117	-4.05619
Rnf212	-0.58748	-4.26766	-1.98287	0.0676572	0.733117	-4.05635
Lonp2	0.194347	8.80083	1.98264	0.0676861	0.733117	-4.05668
H4c14	-1.00355	-1.74203	-1.98237	0.0677181	0.733117	-4.05705
Tmem69	0.332604	3.40416	1.98209	0.0677531	0.733117	-4.05745
Cutc	0.233969	3.53741	1.98182	0.0677859	0.733117	-4.05783
Lst1	-0.59288	0.798316	-1.98176	0.0677937	0.733117	-4.05792
LOC115489816	-0.337618	-4.35094	-1.98159	0.067814	0.733117	-4.05816
Amz1	-0.616015	-0.210348	-1.98145	0.0678312	0.733117	-4.05835
Snrpc	-0.209911	3.75762	-1.98089	0.0679006	0.733437	-4.05915
4933432I09Rik	-0.59082	-4.26654	-1.9803	0.0679735	0.733796	-4.05999
Dsc2	0.285785	5.36092	1.97816	0.0682376	0.736216	-4.06302
H3c10	-0.244768	-4.35023	-1.9759	0.0685161	0.73821	-4.0662
Shoc2	0.227357	4.8596	1.9758	0.0685288	0.73821	-4.06634
Wdr11	0.224329	4.90508	1.97569	0.0685423	0.73821	-4.0665
Lbhd1	-0.284816	2.93816	-1.97523	0.0685997	0.738396	-4.06715
Riok1	-0.265238	2.42006	-1.97485	0.0686466	0.738471	-4.06768
Sdhaf1	-0.402647	3.56077	-1.97441	0.0687017	0.738634	-4.06831
Myl6	-0.197888	7.1485	-1.97396	0.0687576	0.738804	-4.06894
Fbxo38	0.33793	4.73463	1.97362	0.0688002	0.738832	-4.06943
Odf2	0.269911	3.63137	1.97262	0.0689247	0.739316	-4.07084
1700057G04Rik	0.629454	-4.25367	1.97256	0.0689323	0.739316	-4.07092
Snora69	-0.783125	-3.72954	-1.97197	0.0690055	0.739316	-4.07175
Fkrp	-0.221858	3.71378	-1.97159	0.0690532	0.739316	-4.07229
Slx4	-0.398455	2.3728	-1.9714	0.0690765	0.739316	-4.07255
4930455J16Rik	-1.0894	-4.02119	-1.97133	0.0690856	0.739316	-4.07266
Abca6	0.313963	6.79611	1.9709	0.0691397	0.739466	-4.07327
LOC115487534	-0.814556	-1.68558	-1.96966	0.0692948	0.739469	-4.07501
Nxnl2	-0.739431	-3.30662	-1.96961	0.0693011	0.739469	-4.07509
Eipr1	-0.280832	3.3702	-1.9694	0.0693276	0.739469	-4.07538
Maml3	0.434362	1.32072	1.96926	0.0693446	0.739469	-4.07557
Tgfbr3	0.403557	2.79006	1.96905	0.0693705	0.739469	-4.07587
E130018N17Rik	-1.29841	-3.08662	-1.96871	0.0694131	0.739469	-4.07634
Ankrd17	0.341962	5.70434	1.96859	0.0694286	0.739469	-4.07652
Wdr45b	0.283445	5.11038	1.96834	0.0694605	0.739469	-4.07688
Enox2	0.239127	3.50279	1.96719	0.0696045	0.739934	-4.07849
Amer1	0.333024	2.55917	1.96665	0.0696726	0.739934	-4.07925
Zfp354a	0.433258	2.06441	1.96649	0.0696928	0.739934	-4.07948
Mad2l1	-0.512888	1.58626	-1.96607	0.0697455	0.739934	-4.08007
Rassf1	-0.334413	2.57929	-1.96598	0.0697567	0.739934	-4.0802
Dnajc15	-0.329948	4.36675	-1.96592	0.069765	0.739934	-4.08029
Mir8119	-0.234671	-4.08143	-1.96576	0.0697847	0.739934	-4.08051
Ttyh2	-0.222598	5.75278	-1.96486	0.069898	0.740399	-4.08177
Dbt	0.263223	6.04247	1.96393	0.0700152	0.740399	-4.08308
Plxnc1	0.555719	3.86906	1.96392	0.0700165	0.740399	-4.08309
Slc2a9	0.270925	5.22283	1.96388	0.0700223	0.740399	-4.08316
H4c2	-1.12765	-2.29905	-1.96382	0.0700291	0.740399	-4.08323
Slc45a3	-0.380401	5.48016	-1.9632	0.0701082	0.740811	-4.08411
Tmem108	0.893793	-0.961916	1.96286	0.0701515	0.740811	-4.08459
Ywhah	-0.254131	5.67356	-1.96231	0.0702211	0.740811	-4.08537
2810403D21Rik	0.442399	-0.190743	1.96225	0.0702286	0.740811	-4.08545
Ccnb1	-1.47647	-0.996102	-1.96158	0.0703137	0.740883	-4.0864
LOC115489584	0.3584	-4.34402	1.96155	0.0703179	0.740883	-4.08644
Slc5a4b	-1.22245	-3.38185	-1.96091	0.0703987	0.740883	-4.08734
Klhdc8a	-0.777677	1.68249	-1.96073	0.0704213	0.740883	-4.08759
1810062G17Rik	-0.740903	-0.833532	-1.96062	0.070436	0.740883	-4.08775
Camta2	-0.321956	5.60014	-1.96019	0.0704901	0.74103	-4.08835
Paxbp1	-0.303473	4.31864	-1.95946	0.0705826	0.741549	-4.08937
Gt(ROSA)26Sor	-0.415584	2.53343	-1.95917	0.0706199	0.741549	-4.08978
Arap3	0.374019	3.67327	1.95845	0.0707117	0.742051	-4.09079
Stox1	1.25765	-3.24605	1.95677	0.0709271	0.742051	-4.09316
Zfx	1.81846	2.98593	1.95662	0.070946	0.742051	-4.09337
Angel2	0.17514	4.09985	1.95632	0.0709837	0.742051	-4.09378
Pgam1	-0.176195	6.65385	-1.95611	0.0710108	0.742051	-4.09408
Fam161b	-0.481134	-0.406979	-1.95601	0.0710242	0.742051	-4.09423
Rgs17	1.19257	-3.40912	1.95577	0.0710542	0.742051	-4.09456
A330041J22Rik	-1.12464	-2.77684	-1.95563	0.0710726	0.742051	-4.09476
Snora16a	-0.653457	-3.56768	-1.95451	0.0712159	0.742051	-4.09633
Siglech	-1.15259	-1.73631	-1.95445	0.0712245	0.742051	-4.09642
Sgo1	-1.03675	-1.85439	-1.95422	0.0712535	0.742051	-4.09674
LOC115490470	-0.348695	-4.34725	-1.95378	0.0713104	0.742051	-4.09736
Hspa14	0.41467	-0.129402	1.95366	0.0713257	0.742051	-4.09753
Ltk	-1.39495	-2.64791	-1.95336	0.0713648	0.742051	-4.09795
0610010F05Rik	0.225012	3.39805	1.95333	0.0713687	0.742051	-4.098
1700030C14Rik	-0.713943	-4.2255	-1.95322	0.0713817	0.742051	-4.09814
Tmem121b	-0.713943	-4.2255	-1.95322	0.0713817	0.742051	-4.09814
Cyp4b1	0.634121	4.09082	1.9531	0.071398	0.742051	-4.09832
Bcap31	-0.165726	6.73916	-1.95264	0.0714565	0.742051	-4.09896
Pcgf2	-0.476325	3.08516	-1.95251	0.0714735	0.742051	-4.09914
Gbp7	0.317853	3.57424	1.95114	0.0716509	0.742051	-4.10107
Ahsg	0.26562	12.1807	1.95072	0.0717044	0.742051	-4.10165
Ephb4	0.305036	4.48727	1.95055	0.0717262	0.742051	-4.10189
Rab37	0.707376	-1.51422	1.95053	0.0717292	0.742051	-4.10192
Slc12a1	1.65548	-0.723227	1.95014	0.0717799	0.742051	-4.10247
4932438A13Rik	-0.204233	5.65713	-1.9493	0.0718879	0.742051	-4.10364
1700011L22Rik	-0.711324	-4.22638	-1.94883	0.0719498	0.742051	-4.10431
Cntd1	0.632115	-2.05454	1.94878	0.071956	0.742051	-4.10438
Dynll1	-0.63005	3.20999	-1.94834	0.0720125	0.742051	-4.10499
Gask1b	-0.81528	-1.40346	-1.9481	0.0720444	0.742051	-4.10533
Cd28	-0.975379	-1.63338	-1.9462	0.0722915	0.742051	-4.108
Zfp219	-0.29873	4.33842	-1.9461	0.0723044	0.742051	-4.10814
LOC115490020	0.449881	-4.20495	1.94481	0.0724718	0.742051	-4.10994
Abhd8	-0.335639	1.84938	-1.9445	0.0725129	0.742051	-4.11038
Nlrp1c-ps	1.40123	-3.49188	1.94444	0.0725202	0.742051	-4.11046
Ppat	0.42197	3.74031	1.94426	0.0725441	0.742051	-4.11071
Gm34653	-1.12296	-3.69884	-1.94392	0.0725885	0.742051	-4.11119
Klhdc1	1.18958	-2.77114	1.94383	0.0725998	0.742051	-4.11131
Nup62cl	1.13435	-1.09685	1.94279	0.0727365	0.742051	-4.11277
Ankrd24	-0.303997	1.948	-1.94235	0.0727941	0.742051	-4.11339
H2bc21	-0.401871	1.04253	-1.94217	0.0728182	0.742051	-4.11365
Kdr	0.844725	5.02435	1.94164	0.0728865	0.742051	-4.11438
Oaz3	-0.577329	-1.03647	-1.94132	0.0729296	0.742051	-4.11484
Rps14	-0.313029	7.48339	-1.94126	0.0729376	0.742051	-4.11492
Mir6937	-0.53355	-3.30375	-1.94042	0.0730477	0.742051	-4.1161
Calm3	-0.258273	5.45596	-1.94012	0.0730863	0.742051	-4.11651
Zfp26	-0.259739	3.03038	-1.93911	0.0732194	0.742051	-4.11792
Nudt1	-0.233605	3.55381	-1.93875	0.0732678	0.742051	-4.11844
Rnf113a1	-0.29759	0.135993	-1.93837	0.0733179	0.742051	-4.11897
Rapgef4	0.417606	7.25647	1.93816	0.0733447	0.742051	-4.11925
A230028O05Rik	-0.645607	-4.24828	-1.9372	0.0734716	0.742051	-4.1206
Lrit1	0.29653	3.91975	1.9372	0.0734717	0.742051	-4.1206
Proca1	-0.347172	2.35861	-1.93703	0.0734948	0.742051	-4.12084
Plxnb2	0.183395	7.58829	1.93673	0.0735335	0.742051	-4.12125
Ubc	-0.541167	9.62994	-1.93654	0.0735596	0.742051	-4.12153
Cldn19	0.676289	-4.23805	1.93645	0.073571	0.742051	-4.12165
Maf	0.428109	4.93627	1.9362	0.0736034	0.742051	-4.12199
Ntm	0.718977	0.591945	1.93612	0.0736146	0.742051	-4.12211
Zfr2	-0.897553	-1.32815	-1.93602	0.0736284	0.742051	-4.12225
Prxl2b	-0.348684	3.39513	-1.936	0.0736304	0.742051	-4.12227
H2ac4	-0.703873	-3.89203	-1.93576	0.0736628	0.742051	-4.12262
Prkra	0.199859	3.61737	1.93475	0.0737966	0.742051	-4.12403
Gm36028	-0.404738	1.93899	-1.93384	0.0739172	0.742051	-4.1253
Epb41l3	0.655889	1.40561	1.93373	0.0739311	0.742051	-4.12544
Wdr48	0.200132	4.85424	1.93364	0.0739434	0.742051	-4.12557
Fxyd4	0.404138	-4.32877	1.93323	0.0739983	0.742051	-4.12615
Mtrex	0.227628	4.38595	1.93304	0.0740235	0.742051	-4.12641
Uqcc3	-0.295833	4.31928	-1.93213	0.074145	0.742051	-4.12769
Rbak	0.467927	2.21674	1.93211	0.0741474	0.742051	-4.12771
Lysmd4	0.454522	2.88124	1.93186	0.0741801	0.742051	-4.12806
Snhg20	-0.415568	1.95187	-1.93171	0.0742005	0.742051	-4.12827
Cdh19	-0.885976	-4.09416	-1.93171	0.0742009	0.742051	-4.12827
LOC115490084	-0.395522	-4.33164	-1.93131	0.0742539	0.742051	-4.12883
4930594C11Rik	-0.395522	-4.33164	-1.93131	0.0742539	0.742051	-4.12883
Fzd4	0.392731	4.91484	1.93124	0.0742631	0.742051	-4.12893
Ier3ip1	-0.312487	3.5637	-1.93118	0.0742709	0.742051	-4.12901
H2ac10	-0.421438	-4.14211	-1.93116	0.0742739	0.742051	-4.12904
Ash2l	0.2899	3.8406	1.93041	0.0743745	0.742051	-4.13009
Bscl2	-0.287235	5.58014	-1.92997	0.0744325	0.742051	-4.1307
Cox6c	-0.411017	6.77176	-1.92997	0.0744326	0.742051	-4.1307
Mpzl2	0.299926	4.95616	1.92944	0.0745031	0.742051	-4.13143
Spats2	-0.373691	2.63269	-1.9294	0.0745093	0.742051	-4.1315
Pon1	0.210363	9.45029	1.92913	0.0745454	0.742051	-4.13187
Hnf4g	0.776894	-1.39837	1.92906	0.0745548	0.742051	-4.13197
Akr1c14	0.358977	7.96022	1.92906	0.074555	0.742051	-4.13197
Parn	0.165052	4.274	1.92862	0.074614	0.742051	-4.13259
9530052E02Rik	-0.764544	-4.20864	-1.92855	0.0746223	0.742051	-4.13267
Gm14432	0.456655	0.762085	1.92845	0.0746362	0.742051	-4.13282
Setmar	0.242402	1.88567	1.92844	0.0746373	0.742051	-4.13283
Mir7042	0.310826	-4.2031	1.92825	0.0746629	0.742051	-4.1331
Klhl29	-1.43563	-3.13142	-1.92685	0.0748511	0.742051	-4.13505
Pgm2	0.159059	7.86381	1.92664	0.0748799	0.742051	-4.13535
Sdc4	0.297554	8.16603	1.92655	0.0748911	0.742051	-4.13547
Cldn15	-0.541316	-0.0695122	-1.92654	0.0748933	0.742051	-4.13549
Cyp4f17	-0.3942	4.28864	-1.92651	0.0748968	0.742051	-4.13553
Cela2a	-1.31312	-2.71719	-1.9262	0.0749388	0.742051	-4.13596
Tmprss4	0.833835	-1.15508	1.9259	0.0749783	0.742051	-4.13637
Gm14322	-0.787939	-0.0277454	-1.9257	0.0750059	0.742051	-4.13666
Ints5	-0.315109	3.4345	-1.92561	0.0750181	0.742051	-4.13678
Atp2b2	-0.931232	0.712559	-1.92516	0.0750785	0.742051	-4.13741
Bmp8a	0.414603	-4.32528	1.92469	0.0751423	0.742051	-4.13807
Cr1l	0.28102	5.18172	1.92424	0.0752023	0.742051	-4.13869
9330151L19Rik	-0.414273	2.52732	-1.92331	0.0753279	0.742051	-4.13998
Saa2	-1.65528	5.30571	-1.92329	0.0753303	0.742051	-4.14001
Igf2r	0.270736	5.60364	1.92323	0.0753388	0.742051	-4.1401
LOC115485611	-0.681807	-3.21894	-1.92318	0.0753461	0.742051	-4.14017
Spata13	0.273854	4.68391	1.92297	0.0753734	0.742051	-4.14045
Enkd1	-0.708055	-1.0176	-1.92081	0.0756667	0.742051	-4.14347
Etv5	0.423818	1.63525	1.92031	0.075734	0.742051	-4.14416
Slc13a3	-0.4472	4.43752	-1.92023	0.0757461	0.742051	-4.14428
Hhat	-0.503786	-0.1692	-1.92018	0.0757522	0.742051	-4.14434
Shisa4	1.10615	-3.4846	1.91998	0.0757801	0.742051	-4.14463
Rab40c	-0.235097	3.62124	-1.91941	0.0758566	0.742051	-4.14541
Aurkb	-0.821819	-0.939527	-1.91896	0.0759184	0.742051	-4.14605
Ciz1	-0.179781	4.6113	-1.91894	0.0759202	0.742051	-4.14606
Atp5d	-0.337268	7.30785	-1.91886	0.0759321	0.742051	-4.14619
Tmem218	-0.469505	0.99853	-1.91842	0.0759922	0.742051	-4.1468
9030025P20Rik	0.229349	2.6757	1.9183	0.0760081	0.742051	-4.14696
Cap1	0.664458	6.00178	1.91809	0.0760371	0.742051	-4.14726
Tomm34	-0.196172	3.61069	-1.9176	0.076103	0.742051	-4.14793
C230035I16Rik	-1.07682	-3.31237	-1.91744	0.0761259	0.742051	-4.14816
1700010I14Rik	-1.29677	-1.37972	-1.91723	0.0761541	0.742051	-4.14845
Cep44	-0.283568	2.77867	-1.91711	0.0761698	0.742051	-4.14861
Fxn	-0.384647	3.79521	-1.91667	0.0762304	0.742051	-4.14923
Gm36278	0.871544	-4.09381	1.91654	0.0762482	0.742051	-4.14941
Gskip	-0.237957	2.71895	-1.91633	0.0762776	0.742051	-4.14971
Gm13427	0.627235	-4.1093	1.91624	0.0762887	0.742051	-4.14982
E330009J07Rik	0.281057	3.45412	1.91607	0.076312	0.742051	-4.15006
Tmppe	0.512501	0.886158	1.91578	0.0763525	0.742051	-4.15047
Hba-a1	-0.33211	6.51449	-1.91572	0.07636	0.742051	-4.15055
Cyp4a14	0.784725	11.1864	1.9153	0.0764175	0.742051	-4.15113
Dclk3	0.716698	2.30205	1.91403	0.0765921	0.742051	-4.1529
3110040M04Rik	0.414547	-4.27525	1.91373	0.0766327	0.742051	-4.15331
Garnl3	-0.727881	-1.80838	-1.91358	0.076654	0.742051	-4.15353
Wdr77	0.515626	3.98989	1.91331	0.0766913	0.742051	-4.1539
Rrp15	-0.266955	3.19534	-1.91304	0.0767281	0.742051	-4.15428
Ing1	0.298639	3.51519	1.91301	0.0767322	0.742051	-4.15432
Sdk1	0.893839	-3.7039	1.91282	0.0767578	0.742051	-4.15458
Dhcr24	-0.396823	8.77765	-1.91255	0.0767953	0.742051	-4.15496
Pced1b	-0.675876	0.462981	-1.91254	0.0767973	0.742051	-4.15498
Mir1964	-0.436825	-4.17836	-1.91231	0.0768286	0.742051	-4.15529
Rreb1	0.398083	4.74898	1.91226	0.0768355	0.742051	-4.15536
Casp7	0.269068	4.13704	1.9115	0.0769402	0.742051	-4.15642
1700067K01Rik	-0.873707	-1.62113	-1.91137	0.0769572	0.742051	-4.15659
S100a4	-0.682742	0.00445696	-1.9112	0.0769813	0.742051	-4.15683
Snrnp48	-0.202811	4.18981	-1.91108	0.0769971	0.742051	-4.15699
Pimreg	-1.51584	-2.28639	-1.91102	0.0770057	0.742051	-4.15708
Glt8d1	-0.251711	3.15325	-1.91079	0.077038	0.742051	-4.1574
Ccl19	-1.06328	-1.71507	-1.91039	0.0770931	0.742051	-4.15796
BC061195	-0.275226	-4.37174	-1.91009	0.0771339	0.742051	-4.15837
Spib	-0.671874	-0.246915	-1.90971	0.0771868	0.742051	-4.1589
Clca3b	1.46235	-2.69387	1.9095	0.0772164	0.742051	-4.1592
Lyrm1	0.2631	1.02327	1.90942	0.0772265	0.742051	-4.1593
Clcn6	0.43915	1.83783	1.90863	0.0773358	0.742051	-4.1604
Hpgd	0.585685	6.62404	1.9085	0.0773547	0.742051	-4.16058
Slc10a1	0.295323	9.29338	1.90832	0.0773796	0.742051	-4.16083
Gstm2	-0.618555	5.55921	-1.90831	0.077381	0.742051	-4.16085
Cyp2c37	0.489823	8.8363	1.90829	0.077384	0.742051	-4.16088
Cnot10	0.145923	4.37459	1.90809	0.0774113	0.742051	-4.16115
Rhoc	-0.513942	3.63509	-1.90672	0.0776015	0.742051	-4.16305
H3c3	-0.849846	-3.67141	-1.90668	0.0776066	0.742051	-4.16311
Nlrp3	0.77063	0.184381	1.90643	0.0776418	0.742051	-4.16346
Slamf7	-0.800642	-0.16279	-1.90621	0.0776712	0.742051	-4.16375
Lmbrd1	0.208762	5.89359	1.9059	0.0777155	0.742051	-4.16419
Rwdd2b	0.245401	2.89728	1.90584	0.0777227	0.742051	-4.16426
Lrp12	0.515213	1.78191	1.90573	0.0777387	0.742051	-4.16442
Rnase13	-0.621247	0.0588954	-1.90544	0.0777793	0.742051	-4.16483
Pla2g3	-0.880963	-3.86914	-1.9051	0.077826	0.742051	-4.16529
Tmtc1	0.485852	0.61726	1.90508	0.0778285	0.742051	-4.16532
Mettl23	-0.323528	3.4986	-1.90444	0.0779188	0.742051	-4.16622
Tubg1	-0.257562	4.92644	-1.90347	0.0780536	0.742051	-4.16756
Ndufs6	-0.256041	6.34899	-1.9033	0.0780768	0.742051	-4.16779
Olfr1444	0.583116	-4.12452	1.90304	0.0781131	0.742051	-4.16815
Asxl2	0.338577	3.76228	1.90295	0.0781259	0.742051	-4.16827
Ric8a	0.16566	4.48239	1.90236	0.0782086	0.742051	-4.16909
Tmem265	-1.15774	-0.39141	-1.90232	0.0782135	0.742051	-4.16914
Foxc1	0.920795	-2.48979	1.90215	0.0782375	0.742051	-4.16938
Bloc1s3	-0.239552	2.26806	-1.902	0.0782586	0.742051	-4.16959
N4bp3	-0.402819	1.64207	-1.90155	0.078322	0.742051	-4.17022
Crocc	-0.264744	1.07374	-1.9015	0.0783292	0.742051	-4.17029
4933438K21Rik	-0.68195	-4.07125	-1.9012	0.0783714	0.742051	-4.1707
Pxn	0.295613	5.37148	1.901	0.0783991	0.742051	-4.17098
Slc49a4	-0.300189	5.29164	-1.90094	0.078408	0.742051	-4.17107
Eif4g1	0.252067	8.57781	1.90064	0.07845	0.742051	-4.17148
Cyp1a2	0.453943	8.83658	1.90063	0.078451	0.742051	-4.17149
Ywhaz	-0.266912	6.10102	-1.90053	0.0784649	0.742051	-4.17163
Deptor	0.217641	7.31942	1.90048	0.0784718	0.742051	-4.1717
Eprs	0.180587	6.69893	1.90045	0.0784756	0.742051	-4.17173
Acnat1	-0.447501	3.81519	-1.9004	0.0784832	0.742051	-4.17181
Baz2b	0.275218	3.7635	1.90032	0.0784938	0.742051	-4.17191
4930415O20Rik	1.0599	-3.44812	1.90015	0.0785177	0.742051	-4.17215
Fcrlb	-0.798948	-4.12317	-1.90008	0.0785282	0.742051	-4.17225
Trat1	-1.48393	-3.04022	-1.8993	0.0786382	0.742051	-4.17334
Fhit	-0.45867	1.29263	-1.89881	0.0787067	0.742051	-4.17401
Rpp25l	-0.35888	3.34303	-1.89862	0.0787327	0.742051	-4.17427
Rims2	-1.17706	-2.95413	-1.89861	0.0787351	0.742051	-4.17429
Dusp7	0.445238	1.45532	1.89848	0.0787524	0.742051	-4.17446
Me3	0.97735	-2.38148	1.89823	0.0787882	0.742051	-4.17481
Rdh5	-0.428352	3.68691	-1.89754	0.0788852	0.742051	-4.17577
Atrn	0.186366	6.38404	1.89752	0.0788887	0.742051	-4.1758
Npcd	1.10988	-3.90544	1.89687	0.0789794	0.742051	-4.17669
Nphs2	1.02404	-3.05843	1.89636	0.0790521	0.742051	-4.1774
Tpgs1	-0.401511	3.22211	-1.8963	0.0790599	0.742051	-4.17748
Tmem139	-1.24981	-1.76273	-1.89623	0.0790694	0.742051	-4.17757
Shcbp1	-1.04747	-2.08259	-1.89575	0.0791383	0.742051	-4.17825
B2m	-0.211126	10.7064	-1.89552	0.07917	0.742051	-4.17856
Erh	-0.287644	3.91263	-1.89511	0.0792279	0.742051	-4.17912
Vps13c	0.267288	4.76523	1.89477	0.0792769	0.742051	-4.1796
Cend1	-1.41477	-2.83731	-1.8945	0.0793149	0.742051	-4.17997
Fth1	-0.209296	10.3129	-1.89413	0.0793678	0.742051	-4.18049
Bbox1	0.20655	7.3812	1.89411	0.0793693	0.742051	-4.1805
Lrmda	1.12041	-2.07685	1.89385	0.0794061	0.742051	-4.18086
Fam83a	-2.15508	-0.592116	-1.89381	0.0794129	0.742051	-4.18093
Mir7032	-0.35206	-4.26329	-1.89346	0.0794627	0.742051	-4.18141
Rtn1	0.54409	-0.0731824	1.89299	0.0795283	0.742051	-4.18205
Derl1	-0.176214	6.51958	-1.89295	0.0795344	0.742051	-4.18211
Gpr21	-1.11514	-3.35456	-1.89282	0.0795525	0.742051	-4.18229
Atp11c	0.22082	7.15494	1.8928	0.0795561	0.742051	-4.18232
Morf4l1	0.360461	6.59369	1.89276	0.0795612	0.742051	-4.18237
Lmnb1	0.368694	1.78837	1.89251	0.0795969	0.742051	-4.18272
Fam207a	-0.297632	4.74095	-1.89241	0.0796115	0.742051	-4.18286
Plpp2	-0.28949	4.40997	-1.8923	0.0796275	0.742051	-4.18302
Cand2	-0.722007	-1.4953	-1.89184	0.0796921	0.742051	-4.18364
Spx	-1.05229	-3.67704	-1.89174	0.0797068	0.742051	-4.18379
Adam8	-0.627417	-0.0874719	-1.89156	0.079732	0.742051	-4.18403
4933431G14Rik	1.95793	-0.356216	1.89142	0.0797524	0.742051	-4.18423
Gm7457	-0.643953	-4.19922	-1.89017	0.0799297	0.742426	-4.18595
Fam91a1	0.222294	6.04118	1.88956	0.0800174	0.742426	-4.1868
Fam57b	-0.626537	-1.76512	-1.88888	0.0801149	0.742426	-4.18774
Inf2	0.263894	5.58219	1.88884	0.0801202	0.742426	-4.18779
Syngr4	-0.861483	-4.03476	-1.88865	0.0801466	0.742426	-4.18805
Plpp1	0.782523	3.0618	1.88834	0.0801913	0.742426	-4.18848
Gcc2	0.255107	4.13461	1.8883	0.0801967	0.742426	-4.18853
Urad	0.393917	4.11022	1.88806	0.0802317	0.742426	-4.18887
Mpzl3	0.223422	2.88238	1.88799	0.0802421	0.742426	-4.18897
Pigr	0.286727	10.8008	1.88798	0.0802435	0.742426	-4.18898
Pdcd6ip	0.285116	6.41325	1.88753	0.0803075	0.742426	-4.1896
Slc5a4a	-0.713275	-4.22573	-1.88749	0.0803124	0.742426	-4.18964
Akap10	0.559205	3.34573	1.8871	0.0803691	0.742426	-4.19019
Syn3	0.508265	-0.66105	1.88673	0.0804221	0.742426	-4.1907
Zfp444	-0.389679	3.81458	-1.88657	0.0804451	0.742426	-4.19092
[truncated: 16,461 more rows]
